# Supplementary material for: Limiting the Growth of Water-Soluble, Monolayer-Protected Quantum Dots
Source: Int J Anal Chem. 2018 Jul 2;2018:3164347. doi: 10.1155/2018/3164347 (PMC6051105; doi:10.1155/2018/3164347)
Supplement: Supplementary Materials — The supplementary material contains the datasets, as a spreadsheet file, to reproduce the results presented in this manuscript. Size-exclusion chromatography results and fluorescent spectra of QDs are also provided. Figure S1: fluorescence emission and electronic absorption (inset) properties of mercaptosuccinic acid-modified CdSe QDs separated using SEC. Figure S2: fluorescent spectra of glutathione-modified CdSe QDs synthesized in methanol at –35°C. [file 3164347.f1.zip]

Archive with 2 entries (2 files):
- 3164347.f1.docx
- 3164347.f2.xls
