# Supplementary material for: Limiting the Growth of Water-Soluble, Monolayer-Protected Quantum Dots
Source: Int J Anal Chem. 2018 Jul 2;2018:3164347. doi: 10.1155/2018/3164347 (PMC6051105; doi:10.1155/2018/3164347)
Supplement: Supplementary Materials — The supplementary material contains the datasets, as a spreadsheet file, to reproduce the results presented in this manuscript. Size-exclusion chromatography results and fluorescent spectra of QDs are also provided. Figure S1: fluorescence emission and electronic absorption (inset) properties of mercaptosuccinic acid-modified CdSe QDs separated using SEC. Figure S2: fluorescent spectra of glutathione-modified CdSe QDs synthesized in methanol at –35°C. [file 3164347.f1.zip › 3164347.f2.xls]

## Sheet: Fig 1
SCF/VG	Cd acetate	310000	Cd chloride	360000	Cd nitrate	380000	Cd sulfate	1570130
Wavelength (nm)	Intensity (CPS)	Normalized	Intensity (CPS)	Normalized	Intensity (CPS)	Normalized	Intensity (CPS)	Normalized
407	4340	0.014	310	0.000861111	2540	0.00668421	48480	0.0308764
408	3280	0.0105806	240	0.000666667	1680	0.00442105	31850	0.0202849
409	2630	0.00848387	180	0.0005	1560	0.00410526	26570	0.0169222
410	3050	0.00983871	260	0.000722222	1430	0.00376316	25140	0.0160114
411	3240	0.0104516	300	0.000833333	1410	0.00371053	23970	0.0152663
412	3050	0.00983871	220	0.000611111	1320	0.00347368	23500	0.0149669
413	3300	0.0106452	130	0.000361111	1620	0.00426316	23060	0.0146867
414	3190	0.0102903	340	0.000944444	1530	0.00402632	22570	0.0143746
415	3460	0.0111613	290	0.000805556	1580	0.00415789	22040	0.0140371
416	3970	0.0128065	270	0.00075	1640	0.00431579	22110	0.0140816
417	4180	0.0134839	280	0.000777778	1610	0.00423684	22490	0.0143237
418	3680	0.011871	190	0.000527778	1640	0.00431579	23390	0.0148969
419	4520	0.0145806	140	0.000388889	1600	0.00421053	23880	0.0152089
420	4060	0.0130968	310	0.000861111	1560	0.00410526	23930	0.0152408
421	5090	0.0164194	160	0.000444444	1710	0.0045	24710	0.0157376
422	4630	0.0149355	210	0.000583333	2130	0.00560526	26180	0.0166738
423	4530	0.0146129	210	0.000583333	1520	0.004	26430	0.016833
424	5000	0.016129	380	0.00105556	1770	0.00465789	27490	0.0175081
425	4500	0.0145161	220	0.000611111	1880	0.00494737	27440	0.0174763
426	5060	0.0163226	290	0.000805556	1910	0.00502632	29090	0.0185271
427	4930	0.0159032	260	0.000722222	2170	0.00571053	29870	0.0190239
428	4740	0.0152903	260	0.000722222	1910	0.00502632	30900	0.0196799
429	5030	0.0162258	200	0.000555556	2060	0.00542105	32220	0.0205206
430	4790	0.0154516	200	0.000555556	1990	0.00523684	32310	0.0205779
431	5090	0.0164194	230	0.000638889	2080	0.00547368	34730	0.0221192
432	4900	0.0158065	290	0.000805556	2110	0.00555263	36590	0.0233038
433	4840	0.0156129	270	0.00075	1810	0.00476316	37270	0.0237369
434	5120	0.0165161	150	0.000416667	2220	0.00584211	42730	0.0272143
435	4960	0.016	150	0.000416667	1840	0.00484211	43740	0.0278576
436	5410	0.0174516	150	0.000416667	2430	0.00639474	50030	0.0318636
437	5140	0.0165806	210	0.000583333	2160	0.00568421	54610	0.0347806
438	4730	0.0152581	250	0.000694444	1820	0.00478947	60790	0.0387165
439	4800	0.0154839	320	0.000888889	2510	0.00660526	67590	0.0430474
440	4970	0.0160323	220	0.000611111	2410	0.00634211	75470	0.0480661
441	5260	0.0169677	270	0.00075	2520	0.00663158	84150	0.0535943
442	5090	0.0164194	250	0.000694444	2490	0.00655263	88990	0.0566768
443	5400	0.0174194	290	0.000805556	2500	0.00657895	92070	0.0586385
444	5200	0.0167742	380	0.00105556	2390	0.00628947	98830	0.0629438
445	5260	0.0169677	240	0.000666667	2770	0.00728947	101360	0.0645552
446	5230	0.016871	180	0.0005	2690	0.00707895	100680	0.0641221
447	5330	0.0171935	320	0.000888889	2630	0.00692105	98110	0.0624853
448	5290	0.0170645	230	0.000638889	2780	0.00731579	97380	0.0620203
449	5070	0.0163548	130	0.000361111	2500	0.00657895	94820	0.0603899
450	5320	0.0171613	200	0.000555556	2530	0.00665789	91750	0.0584347
451	5050	0.0162903	210	0.000583333	2850	0.0075	90680	0.0577532
452	5070	0.0163548	200	0.000555556	2900	0.00763158	90470	0.0576194
453	5770	0.0186129	250	0.000694444	3210	0.00844737	89030	0.0567023
454	5380	0.0173548	200	0.000555556	3480	0.00915789	91770	0.0584474
455	5910	0.0190645	290	0.000805556	3450	0.00907895	94110	0.0599377
456	6340	0.0204516	340	0.000944444	3690	0.00971053	98680	0.0628483
457	5750	0.0185484	270	0.00075	4040	0.0106316	102080	0.0650137
458	6640	0.0214194	300	0.000833333	4130	0.0108684	106500	0.0678288
459	6300	0.0203226	270	0.00075	4370	0.0115	110440	0.0703381
460	6510	0.021	200	0.000555556	4470	0.0117632	117070	0.0745607
461	6680	0.0215484	210	0.000583333	5130	0.0135	119670	0.0762166
462	5980	0.0192903	230	0.000638889	5280	0.0138947	126180	0.0803628
463	6870	0.0221613	210	0.000583333	5770	0.0151842	136350	0.0868399
464	6790	0.0219032	320	0.000888889	6310	0.0166053	137880	0.0878144
465	7310	0.0235806	170	0.000472222	6100	0.0160526	147870	0.0941769
466	7300	0.0235484	260	0.000722222	6580	0.0173158	153280	0.0976225
467	7090	0.022871	260	0.000722222	6880	0.0181053	161210	0.102673
468	8000	0.0258065	240	0.000666667	7620	0.0200526	167680	0.106794
469	7260	0.0234194	250	0.000694444	7450	0.0196053	177750	0.113207
470	8000	0.0258065	240	0.000666667	8170	0.0215	182580	0.116283
471	7270	0.0234516	300	0.000833333	9130	0.0240263	192840	0.122818
472	7600	0.0245161	280	0.000777778	8930	0.0235	200500	0.127696
473	7900	0.0254839	280	0.000777778	9090	0.0239211	210010	0.133753
474	7850	0.0253226	280	0.000777778	9580	0.0252105	217230	0.138352
475	8510	0.0274516	300	0.000833333	9760	0.0256842	220880	0.140676
476	8540	0.0275484	270	0.00075	10810	0.0284474	232600	0.148141
477	8260	0.0266452	210	0.000583333	11370	0.0299211	244880	0.155962
478	8020	0.025871	190	0.000527778	11800	0.0310526	249390	0.158834
479	8430	0.0271935	170	0.000472222	11330	0.0298158	255830	0.162936
480	8580	0.0276774	270	0.00075	12370	0.0325526	265910	0.169355
481	8780	0.0283226	210	0.000583333	12130	0.0319211	274360	0.174737
482	9310	0.0300323	220	0.000611111	12360	0.0325263	283090	0.180297
483	9120	0.0294194	170	0.000472222	13360	0.0351579	291970	0.185953
484	9760	0.0314839	230	0.000638889	13810	0.0363421	301540	0.192048
485	9440	0.0304516	190	0.000527778	13910	0.0366053	309930	0.197391
486	9780	0.0315484	180	0.0005	14290	0.0376053	323640	0.206123
487	9340	0.030129	260	0.000722222	14610	0.0384474	330500	0.210492
488	9830	0.0317097	190	0.000527778	14470	0.0380789	340270	0.216715
489	9780	0.0315484	250	0.000694444	14820	0.039	349960	0.222886
490	10330	0.0333226	250	0.000694444	15200	0.04	362350	0.230777
491	10690	0.0344839	230	0.000638889	16300	0.0428947	372530	0.237261
492	10360	0.0334194	300	0.000833333	16910	0.0445	378560	0.241101
493	11090	0.0357742	280	0.000777778	16530	0.0435	392260	0.249826
494	11410	0.0368065	320	0.000888889	17890	0.0470789	406400	0.258832
495	12100	0.0390323	160	0.000444444	18270	0.0480789	414350	0.263895
496	12250	0.0395161	240	0.000666667	18720	0.0492632	426230	0.271462
497	11980	0.0386452	230	0.000638889	19550	0.0514474	438870	0.279512
498	11650	0.0375806	250	0.000694444	18560	0.0488421	454880	0.289708
499	13200	0.0425806	290	0.000805556	19460	0.0512105	462520	0.294574
500	13150	0.0424194	180	0.0005	19830	0.0521842	476740	0.303631
501	13140	0.0423871	250	0.000694444	21260	0.0559474	488270	0.310974
502	14100	0.0454839	240	0.000666667	21110	0.0555526	501260	0.319247
503	13820	0.0445806	250	0.000694444	22270	0.0586053	510850	0.325355
504	13890	0.0448065	320	0.000888889	22960	0.0604211	525970	0.334985
505	15100	0.0487097	260	0.000722222	24010	0.0631842	535510	0.341061
506	15230	0.049129	180	0.0005	24050	0.0632895	550870	0.350844
507	15910	0.0513226	340	0.000944444	24790	0.0652368	564190	0.359327
508	16490	0.0531935	280	0.000777778	26020	0.0684737	576070	0.366893
509	16840	0.0543226	340	0.000944444	27440	0.0722105	595800	0.379459
510	18220	0.0587742	330	0.000916667	28340	0.0745789	606020	0.385968
511	18900	0.0609677	400	0.00111111	28570	0.0751842	617870	0.393515
512	20150	0.065	290	0.000805556	30380	0.0799474	634280	0.403967
513	20560	0.0663226	400	0.00111111	31810	0.0837105	649530	0.413679
514	22600	0.0729032	370	0.00102778	32710	0.0860789	663880	0.422818
515	22100	0.0712903	230	0.000638889	33100	0.0871053	678990	0.432442
516	22750	0.0733871	380	0.00105556	33630	0.0885	686710	0.437359
517	23550	0.0759677	380	0.00105556	34590	0.0910263	701720	0.446918
518	22220	0.0716774	440	0.00122222	35460	0.0933158	709340	0.451772
519	24650	0.0795161	390	0.00108333	35870	0.0943947	723690	0.460911
520	22880	0.0738065	380	0.00105556	37590	0.0989211	740450	0.471585
521	23710	0.0764839	580	0.00161111	38220	0.100579	746660	0.47554
522	24710	0.0797097	620	0.00172222	38880	0.102316	768770	0.489622
523	24470	0.0789355	590	0.00163889	41130	0.108237	775300	0.493781
524	26210	0.0845484	640	0.00177778	41740	0.109842	787960	0.501844
525	28130	0.0907419	700	0.00194444	42700	0.112368	805910	0.513276
526	28980	0.0934839	960	0.00266667	44990	0.118395	821770	0.523377
527	30910	0.0997097	950	0.00263889	47020	0.123737	834930	0.531759
528	31290	0.100935	960	0.00266667	49060	0.129105	851310	0.542191
529	33190	0.107065	1230	0.00341667	51710	0.136079	866920	0.552133
530	32540	0.104968	1370	0.00380556	53040	0.139579	878000	0.559189
531	34880	0.112516	1350	0.00375	53550	0.140921	891560	0.567826
532	36310	0.117129	1500	0.00416667	56020	0.147421	907190	0.57778
533	38240	0.123355	1700	0.00472222	57320	0.150842	919560	0.585659
534	38720	0.124903	1980	0.0055	60680	0.159684	930270	0.59248
535	43750	0.141129	2180	0.00605556	64340	0.169316	949040	0.604434
536	44400	0.143226	2590	0.00719444	64780	0.170474	962400	0.612943
537	47870	0.154419	2890	0.00802778	67630	0.177974	981440	0.625069
538	49550	0.159839	3270	0.00908333	72680	0.191263	990830	0.63105
539	50820	0.163935	4010	0.0111389	73790	0.194184	1014660	0.646227
540	53420	0.172323	4140	0.0115	76740	0.201947	1024260	0.652341
541	56650	0.182742	4650	0.0129167	80320	0.211368	1040420	0.662633
542	59330	0.191387	5320	0.0147778	82890	0.218132	1057340	0.673409
543	61620	0.198774	5650	0.0156944	84190	0.221553	1071410	0.68237
544	64120	0.206839	6240	0.0173333	90100	0.237105	1082610	0.689503
545	66200	0.213548	7680	0.0213333	95640	0.251684	1100070	0.700624
546	69640	0.224645	8240	0.0228889	96780	0.254684	1109510	0.706636
547	73980	0.238645	9230	0.0256389	100880	0.265474	1121480	0.714259
548	77820	0.251032	10500	0.0291667	103390	0.272079	1139980	0.726042
549	80290	0.259	12520	0.0347778	110400	0.290526	1155050	0.73564
550	86560	0.279226	13310	0.0369722	115380	0.303632	1169140	0.744614
551	89760	0.289548	15070	0.0418611	118800	0.312632	1185860	0.755262
552	96050	0.309839	16040	0.0445556	123100	0.323947	1195770	0.761574
553	97540	0.314645	19000	0.0527778	127560	0.335684	1211080	0.771325
554	104790	0.338032	20760	0.0576667	132760	0.349368	1222390	0.778528
555	110950	0.357903	24220	0.0672778	138100	0.363421	1225080	0.780241
556	114260	0.368581	25980	0.0721667	143110	0.376605	1244150	0.792387
557	121150	0.390806	28720	0.0797778	146380	0.385211	1262590	0.804131
558	126190	0.407065	31630	0.0878611	152810	0.402132	1269100	0.808277
559	131160	0.423097	34890	0.0969167	159560	0.419895	1283970	0.817748
560	138100	0.445484	37500	0.104167	162490	0.427605	1293460	0.823792
561	146280	0.471871	42830	0.118972	171960	0.452526	1308150	0.833148
562	148070	0.477645	46610	0.129472	177000	0.465789	1321400	0.841586
563	154870	0.499581	50890	0.141361	182060	0.479105	1319000	0.840058
564	158700	0.511935	56600	0.157222	187100	0.492368	1341880	0.85463
565	165350	0.533387	58620	0.162833	192810	0.507395	1351100	0.860502
566	173870	0.560871	64130	0.178139	198340	0.521947	1359080	0.865584
567	177930	0.573968	70430	0.195639	204640	0.538526	1369060	0.871941
568	185500	0.598387	75520	0.209778	211210	0.555816	1376010	0.876367
569	192410	0.620677	82770	0.229917	216030	0.5685	1388750	0.884481
570	195340	0.630129	88530	0.245917	223520	0.588211	1390150	0.885373
571	203440	0.656258	95400	0.265	228090	0.600237	1407170	0.896212
572	208030	0.671065	99370	0.276028	235320	0.619263	1411860	0.899199
573	216820	0.699419	106690	0.296361	238510	0.627658	1425050	0.9076
574	219130	0.706871	115730	0.321472	244990	0.644711	1427940	0.909441
575	225550	0.727581	122220	0.3395	251250	0.661184	1435630	0.914338
576	231890	0.748032	131070	0.364083	254910	0.670816	1449350	0.923076
577	236990	0.764484	136660	0.379611	259410	0.682658	1452510	0.925089
578	242680	0.782839	144720	0.402	264500	0.696053	1463340	0.931987
579	245500	0.791935	151800	0.421667	269490	0.709184	1468670	0.935381
580	250260	0.80729	160690	0.446361	275080	0.723895	1474550	0.939126
581	255620	0.824581	166640	0.462889	282510	0.743447	1477630	0.941088
582	260500	0.840323	175570	0.487694	286230	0.753237	1485600	0.946164
583	263220	0.849097	182940	0.508167	291110	0.766079	1490120	0.949042
584	268930	0.867516	190970	0.530472	296350	0.779868	1499490	0.95501
585	272450	0.878871	200300	0.556389	299950	0.789342	1506480	0.959462
586	276350	0.891452	205420	0.570611	305310	0.803447	1513640	0.964022
587	279400	0.90129	214910	0.596972	309510	0.8145	1517320	0.966366
588	284160	0.916645	221950	0.616528	310610	0.817395	1520790	0.968576
589	286220	0.92329	231270	0.642417	314880	0.828632	1528940	0.973767
590	288640	0.931097	237850	0.660694	318680	0.838632	1532630	0.976117
591	293520	0.946839	244620	0.6795	322040	0.847474	1534780	0.977486
592	295660	0.953742	251660	0.699056	328100	0.863421	1537870	0.979454
593	294590	0.95029	257630	0.715639	327230	0.861132	1552400	0.988708
594	295170	0.952161	266340	0.739833	334250	0.879605	1550620	0.987574
595	296000	0.954839	272100	0.755833	337620	0.888474	1548750	0.986383
596	298510	0.962935	276280	0.767444	335320	0.882421	1548420	0.986173
597	298510	0.962935	282970	0.786028	336730	0.886132	1550830	0.987708
598	298790	0.963839	289020	0.802833	344940	0.907737	1551750	0.988294
599	303570	0.979258	291850	0.810694	348660	0.917526	1557230	0.991784
600	299180	0.965097	300000	0.833333	352770	0.928342	1553910	0.98967
601	302870	0.977	305280	0.848	348030	0.915868	1570130	1
602	299780	0.967032	308890	0.858028	353010	0.928974	1562650	0.995236
603	302050	0.974355	310840	0.863444	355620	0.935842	1561480	0.994491
604	302480	0.975742	315330	0.875917	355930	0.936658	1565990	0.997363
605	303000	0.977419	318420	0.8845	359730	0.946658	1563850	0.996
606	298250	0.962097	321140	0.892056	358670	0.943868	1566690	0.997809
607	299970	0.967645	325620	0.9045	359270	0.945447	1566410	0.997631
608	299680	0.96671	327280	0.909111	361610	0.951605	1561820	0.994707
609	297390	0.959323	327350	0.909306	363220	0.955842	1562530	0.99516
610	297300	0.959032	327670	0.910194	362060	0.952789	1556830	0.991529
611	296260	0.955677	332490	0.923583	361120	0.950316	1557830	0.992166
612	291460	0.940194	331930	0.922028	365450	0.961711	1563830	0.995988
613	290000	0.935484	330920	0.919222	368230	0.969026	1557110	0.991708
614	292910	0.944871	329540	0.915389	359250	0.945395	1560280	0.993727
615	287470	0.927323	333190	0.925528	363170	0.955711	1563280	0.995637
616	286690	0.924806	331150	0.919861	362290	0.953395	1548750	0.986383
617	286880	0.925419	332150	0.922639	364370	0.958868	1547960	0.98588
618	284350	0.917258	331740	0.9215	363230	0.955868	1536820	0.978785
619	281180	0.907032	333500	0.926389	363190	0.955763	1536680	0.978696
620	280460	0.90471	336410	0.934472	361840	0.952211	1537180	0.979014
621	275380	0.888323	330240	0.917333	364930	0.960342	1539310	0.980371
622	275320	0.888129	331110	0.91975	360660	0.949105	1528950	0.973773
623	271450	0.875645	328040	0.911222	361650	0.951711	1532370	0.975951
624	273000	0.880645	325810	0.905028	363940	0.957737	1523120	0.97006
625	274790	0.886419	324430	0.901194	359190	0.945237	1522440	0.969627
626	268050	0.864677	321680	0.893556	359570	0.946237	1520450	0.968359
627	264100	0.851935	319440	0.887333	360250	0.948026	1510090	0.961761
628	263390	0.849645	319070	0.886306	357040	0.939579	1505360	0.958749
629	263850	0.851129	319400	0.887222	356370	0.937816	1492490	0.950552
630	259180	0.836065	318120	0.883667	359550	0.946184	1500370	0.955571
631	257470	0.830548	316290	0.878583	357300	0.940263	1492560	0.950596
632	256220	0.826516	312540	0.868167	354040	0.931684	1490440	0.949246
633	254890	0.822226	311410	0.865028	351170	0.924132	1487670	0.947482
634	252780	0.815419	307200	0.853333	347370	0.914132	1470370	0.936464
635	251040	0.809806	307190	0.853306	348810	0.917921	1472100	0.937566
636	246990	0.796742	306920	0.852556	351900	0.926053	1463900	0.932343
637	244370	0.78829	301900	0.838611	344600	0.906842	1451840	0.924662
638	242220	0.781355	296520	0.823667	345260	0.908579	1449100	0.922917
639	241610	0.779387	295540	0.820944	345700	0.909737	1438610	0.916236
640	236990	0.764484	296050	0.822361	343050	0.902763	1439330	0.916695
641	233720	0.753935	290300	0.806389	342850	0.902237	1428600	0.909861
642	234760	0.75729	284990	0.791639	339440	0.893263	1425430	0.907842
643	227840	0.734968	283890	0.788583	336340	0.885105	1423940	0.906893
644	229490	0.74029	282440	0.784556	337540	0.888263	1405740	0.895302
645	224430	0.723968	276230	0.767306	335540	0.883	1403520	0.893888
646	221470	0.714419	272450	0.756806	334160	0.879368	1388760	0.884487
647	223100	0.719677	270540	0.7515	332580	0.875211	1383400	0.881074
648	219160	0.706968	269380	0.748278	328970	0.865711	1371740	0.873647
649	213180	0.687677	265700	0.738056	324310	0.853447	1364450	0.869004
650	214000	0.690323	263080	0.730778	321420	0.845842	1351540	0.860782
651	211870	0.683452	260530	0.723694	321460	0.845947	1345540	0.856961
652	209350	0.675323	259950	0.722083	318250	0.8375	1322670	0.842395
653	206760	0.666968	255010	0.708361	314590	0.827868	1321740	0.841803
654	204950	0.661129	250650	0.69625	317060	0.834368	1307780	0.832912
655	200300	0.646129	247390	0.687194	311630	0.820079	1294270	0.824308
656	200310	0.646161	246130	0.683694	308220	0.811105	1284800	0.818276
657	193540	0.624323	240260	0.667389	304030	0.800079	1270190	0.808971
658	194540	0.627548	237710	0.660306	306220	0.805842	1260830	0.80301
659	195500	0.630645	233910	0.64975	298870	0.7865	1252430	0.79766
660	189820	0.612323	227310	0.631417	296570	0.780447	1235810	0.787075
661	185420	0.598129	228090	0.633583	294980	0.776263	1225600	0.780572
662	184330	0.594613	224950	0.624861	290340	0.764053	1206060	0.768127
663	182550	0.588871	222270	0.617417	287440	0.756421	1203440	0.766459
664	177420	0.572323	216940	0.602611	286850	0.754868	1191600	0.758918
665	178420	0.575548	215130	0.597583	283810	0.746868	1171420	0.746066
666	174220	0.562	214320	0.595333	277610	0.730553	1159620	0.73855
667	169090	0.545452	208980	0.5805	276750	0.728289	1141130	0.726774
668	167740	0.541097	202500	0.5625	273750	0.720395	1132680	0.721392
669	165320	0.53329	201250	0.559028	267900	0.705	1122470	0.71489
670	162310	0.523581	195630	0.543417	265160	0.697789	1102570	0.702216
671	160360	0.51729	194930	0.541472	263660	0.693842	1089540	0.693917
672	157570	0.50829	191840	0.532889	261940	0.689316	1078300	0.686758
673	153480	0.495097	187320	0.520333	258420	0.680053	1065680	0.678721
674	151020	0.487161	183030	0.508417	255510	0.672395	1048600	0.667843
675	150040	0.484	180450	0.50125	248540	0.654053	1033330	0.658117
676	147910	0.477129	176370	0.489917	245000	0.644737	1022330	0.651112
677	144190	0.465129	173510	0.481972	238220	0.626895	999580	0.636622
678	141370	0.456032	171300	0.475833	236640	0.622737	983980	0.626687
679	138200	0.445806	165970	0.461028	233150	0.613553	973050	0.619726
680	136680	0.440903	163690	0.454694	232200	0.611053	961510	0.612376
681	132910	0.428742	160150	0.444861	226910	0.597132	945320	0.602065
682	132150	0.42629	161490	0.448583	221390	0.582605	941270	0.599485
683	130130	0.419774	156130	0.433694	223800	0.588947	919880	0.585862
684	128430	0.41429	155780	0.432722	219750	0.578289	919740	0.585773
685	126730	0.408806	151450	0.420694	218480	0.574947	906520	0.577353
686	125280	0.404129	148320	0.412	214000	0.563158	903880	0.575672

## Sheet: Fig 2
NDB	tHEAT	λMAX	perchlorate (black)
2013-02-07	0	506
	8	523
	18	508
	25	536
	29	570
	33	593
	45	593
	50	584
	tHEAT	λMAX	sulfate (red)
2013-02-14	0	434
	12	453
	18	526
	22	542
	26	557
	30	562
	41	563
	52	568
	60	568
	tHEAT	λMAX	chloride (blue)
2013-02-21	4	468
	22	464
	33	520
	36	537
	42	549
	53	552
	57	560

## Sheet: Fig 3
				MeOH (-5 deg C)	t=0		t=30		t=60		t=240		t=300		t=520		t=590		t=1650		t=1890		MeOH (-6 deg C)	t=0		t=170		t=190		t=235		t=340		t=400		t=1240		MeOH (0 deg C)	t=0		t=30		t=160		t=400		t=990		t=1280
time (min)	l MAX (nm)	FWHM (nm)	FEA (10/27/14)		Wavelength (nm)	CPS	Wavelength (nm)	CPS	Wavelength (nm)	CPS	Wavelength (nm)	CPS	Wavelength (nm)	CPS	Wavelength (nm)	CPS	Wavelength (nm)	CPS	Wavelength (nm)	CPS	Wavelength (nm)	CPS		Wavelength (nm)	CPS	Wavelength (nm)	CPS	Wavelength (nm)	CPS	Wavelength (nm)	CPS	Wavelength (nm)	CPS	Wavelength (nm)	CPS	Wavelength (nm)	CPS		Wavelength (nm)	CPS	Wavelength (nm)	CPS	Wavelength (nm)	CPS	Wavelength (nm)	CPS	Wavelength (nm)	CPS	Wavelength (nm)
0	565	92	red		400	859550	400	1415170	400	2404180	400	17109600	400	188150	400	75480	400	109370	400	109370	400	38600		400	173910	400	749590	400	2334900	400	662970	400	1080330	400	119390	400	65110		400	19333800	400	19712800	400	18930400	400	16444500	400	16950800	400
170	569	93	<--- (-6 C)		401	660900	401	1087530	401	1876900	401	18689500	401	142070	401	56010	401	81860	401	81860	401	28760		401	138100	401	589090	401	1842980	401	512590	401	840630	401	89720	401	50400		401	19609300	401	19224400	401	19549100	401	18489500	401	18763800	401
190	567	95			402	456790	402	755430	402	1310350	402	19568500	402	96120	402	39200	402	56570	402	56570	402	22300		402	97920	402	419460	402	1299800	402	366120	402	590350	402	64770	402	34930		402	18883300	402	17853800	402	19111700	402	19548600	402	19495500	402
235	570	91			403	281620	403	474160	403	826130	403	18592400	403	58730	403	26120	403	35060	403	35060	403	15080		403	62460	403	264770	403	824530	403	225890	403	369620	403	40450	403	22620		403	16768700	403	15178300	403	17184200	403	18503700	403	18283200	403
340	570	93			404	149550	404	250480	404	439060	404	15662800	404	32510	404	13760	404	19210	404	19210	404	9650		404	34120	404	143280	404	446280	404	123870	404	198270	404	22900	404	13190		404	12725900	404	10784600	404	13326800	404	15287200	404	14988200	404
400	578	94			405	69670	405	116900	405	205570	405	10864300	405	15820	405	7540	405	10490	405	10490	405	6620		405	16970	405	69530	405	215140	405	60400	405	94690	405	11870	405	7510		405	7644880	405	6064940	405	8173750	405	10199800	405	9873750	405
1240	589	97			406	27410	406	44800	406	79850	406	5331270	406	7680	406	4410	406	5420	406	5420	406	4770		406	7730	406	28960	406	87360	406	24530	406	38650	406	6520	406	5100		406	3317740	406	2542640	406	3611630	406	4800430	406	4615550	406
					407	9230	407	15790	407	26050	407	1915810	407	3840	407	2770	407	3580	407	3580	407	4210		407	3270	407	10990	407	32370	407	9370	407	14680	407	3610	407	3570		407	1152840	407	874410	407	1255640	407	1712070	407	1635400	407
			FEA (11/10/14)		408	5370	408	8860	408	14260	408	1042800	408	2730	408	2580	408	2890	408	2890	408	3810		408	2550	408	6790	408	20280	408	6250	408	9030	408	3340	408	3540		408	644450	408	502220	408	703260	408	954810	408	910730	408
0	565	90	green		409	4630	409	7600	409	12800	409	861740	409	2800	409	2280	409	2690	409	2690	409	3720		409	2520	409	6170	409	18570	409	5750	409	8050	409	2980	409	3340		409	534030	409	421660	409	579210	409	775950	409	740510	409
30	566	93	<--- (-5 C)		410	4370	410	7720	410	11630	410	779230	410	2270	410	2130	410	2630	410	2630	410	4020		410	2120	410	5750	410	16730	410	5650	410	7400	410	2890	410	3170		410	475880	410	381710	410	518850	410	685380	410	651430	410
60	567	95			411	4250	411	6460	411	11190	411	713960	411	2450	411	2040	411	2800	411	2800	411	3750		411	2200	411	5840	411	17620	411	5040	411	8020	411	2830	411	2640		411	439120	411	356220	411	477330	411	631030	411	598750	411
240	580	94			412	3890	412	6190	412	10490	412	668440	412	2420	412	2120	412	2430	412	2430	412	3840		412	1890	412	5770	412	16950	412	5260	412	7540	412	2780	412	2740		412	408870	412	329630	412	438230	412	576930	412	553100	412
300	580	95			413	3750	413	6310	413	9970	413	633200	413	2630	413	2250	413	2810	413	2810	413	3920		413	2030	413	5300	413	16980	413	5140	413	7360	413	2480	413	3220		413	383990	413	316000	413	413880	413	538790	413	510990	413
520	585	94			414	3600	414	5890	414	10160	414	608870	414	2220	414	2330	414	2690	414	2690	414	4220		414	2450	414	5650	414	16200	414	4910	414	7270	414	2970	414	2780		414	365390	414	305160	414	384690	414	504280	414	479450	414
590	583	93			415	4060	415	5690	415	9760	415	580210	415	2410	415	1950	415	2760	415	2760	415	3790		415	1970	415	5710	415	15740	415	5150	415	6690	415	2730	415	3080		415	344690	415	286280	415	373000	415	476590	415	451190	415
1650	591	98			416	3960	416	5660	416	9890	416	564530	416	2260	416	2480	416	2450	416	2450	416	4020		416	2240	416	5450	416	17570	416	5130	416	6970	416	2580	416	2530		416	325280	416	275340	416	351200	416	449180	416	434370	416
1890	597	101			417	3430	417	5950	417	9350	417	548240	417	2610	417	2190	417	2430	417	2430	417	3790		417	1880	417	5440	417	16450	417	4840	417	7110	417	2720	417	2800		417	309350	417	258810	417	329550	417	428810	417	404840	417
					418	3830	418	5920	418	9950	418	527620	418	2620	418	2250	418	2440	418	2440	418	4050		418	2270	418	5480	418	17160	418	4720	418	7570	418	2470	418	2930		418	291820	418	244960	418	314900	418	404210	418	387200	418
					419	3920	419	6290	419	9900	419	517680	419	2530	419	1920	419	2580	419	2580	419	4290		419	2150	419	6060	419	16380	419	5550	419	7660	419	2800	419	2820		419	277680	419	231510	419	296280	419	385090	419	369260	419
0	553		EAS (10/12/15)		420	3880	420	6180	420	9920	420	512110	420	2260	420	2160	420	2550	420	2550	420	3730		420	2000	420	5920	420	16550	420	5130	420	7880	420	2920	420	2670		420	264930	420	214900	420	284730	420	365070	420	354080	420
30	552		MeOH: 0 C		421	3430	421	6370	421	10390	421	502580	421	2510	421	1990	421	2220	421	2220	421	3850		421	2310	421	5680	421	16580	421	4830	421	7330	421	2900	421	2820		421	252800	421	205730	421	273240	421	349600	421	337210	421
160	562		blue		422	3510	422	6170	422	10420	422	497820	422	2150	422	2060	422	2430	422	2430	422	3710		422	2070	422	5780	422	17590	422	5250	422	7430	422	2630	422	3230		422	240180	422	196060	422	257920	422	335190	422	320700	422
400	553				423	3700	423	5830	423	10040	423	493270	423	2330	423	2150	423	2590	423	2590	423	3580		423	2420	423	5800	423	17040	423	5390	423	7720	423	2510	423	2920		423	235690	423	185890	423	252260	423	330050	423	313960	423
990	552				424	3670	424	6000	424	10130	424	488020	424	2230	424	2140	424	2540	424	2540	424	3880		424	2630	424	5940	424	17480	424	5210	424	7970	424	2910	424	2550		424	231920	424	185910	424	246650	424	315440	424	308030	424
1280	550				425	3690	425	6610	425	10370	425	484520	425	2270	425	2050	425	2510	425	2510	425	3570		425	1820	425	5760	425	18020	425	5460	425	7700	425	3050	425	3050		425	230820	425	182500	425	244150	425	313220	425	305960	425
1700	547				426	3880	426	6560	426	11060	426	487500	426	2480	426	2030	426	2570	426	2570	426	4140		426	2200	426	6050	426	17760	426	5090	426	7580	426	2710	426	2900		426	231780	426	185850	426	243800	426	308530	426	299430	426
					427	3790	427	6840	427	11080	427	484070	427	2010	427	2260	427	2570	427	2570	427	3750		427	2300	427	6020	427	17690	427	5780	427	8070	427	2720	427	2560		427	234220	427	188130	427	243220	427	310900	427	302540	427
					428	3810	428	6740	428	10480	428	488330	428	2470	428	2160	428	2570	428	2570	428	4030		428	2370	428	5900	428	18040	428	5620	428	8020	428	2770	428	2530		428	240620	428	197830	428	251260	428	314620	428	308740	428
0	592				429	3930	429	5790	429	10850	429	483380	429	2250	429	2050	429	2900	429	2900	429	3970		429	2350	429	5590	429	18770	429	5450	429	8240	429	2520	429	3250		429	255610	429	211880	429	267590	429	324900	429	324130	429
20	610				430	3890	430	6520	430	11400	430	482780	430	2500	430	2090	430	2670	430	2670	430	3330		430	2100	430	6070	430	17970	430	5270	430	8230	430	2660	430	2680		430	279440	430	241620	430	285710	430	348350	430	344030	430
25	639		EAS (9/10/15)		431	4200	431	6400	431	11480	431	483570	431	2270	431	1890	431	2480	431	2480	431	3840		431	2580	431	6220	431	18790	431	5650	431	8570	431	2560	431	2870		431	308640	431	276260	431	312300	431	370400	431	370140	431
30	642		H2O: 0 C		432	3960	432	6770	432	12710	432	482070	432	2460	432	1990	432	2440	432	2440	432	3540		432	2480	432	6330	432	17970	432	5820	432	8420	432	3190	432	2890		432	348280	432	321810	432	356070	432	404160	432	404890	432
33	648		black		433	4080	433	6530	433	11710	433	482160	433	2510	433	2260	433	2350	433	2350	433	3930		433	1950	433	6290	433	19100	433	5740	433	8430	433	2820	433	2570		433	388740	433	376580	433	398580	433	450110	433	449000	433
38	651				434	4310	434	6910	434	11800	434	484810	434	2300	434	2350	434	2430	434	2430	434	3620		434	2310	434	6110	434	19570	434	6040	434	9620	434	2840	434	2770		434	436710	434	432350	434	443510	434	488420	434	495200	434
43	654				435	4320	435	6730	435	12640	435	485870	435	2870	435	2290	435	2840	435	2840	435	3340		435	2740	435	6470	435	19430	435	6110	435	8460	435	3070	435	2800		435	481910	435	483030	435	484660	435	525770	435	534190	435
48	659				436	4310	436	7090	436	12650	436	486380	436	2620	436	1900	436	2670	436	2670	436	3650		436	2570	436	6590	436	19570	436	5590	436	8780	436	2830	436	2960		436	518660	436	524650	436	523300	436	560680	436	569340	436
55	657				437	4300	437	8040	437	12940	437	487220	437	2540	437	2060	437	2840	437	2840	437	4060		437	2390	437	6730	437	19920	437	6450	437	9150	437	2810	437	2870		437	545690	437	546390	437	544680	437	582450	437	591310	437
					438	4720	438	7420	438	13620	438	485450	438	2660	438	2430	438	2720	438	2720	438	3840		438	2660	438	7370	438	20500	438	6040	438	8840	438	2760	438	2670		438	552830	438	555600	438	547630	438	588870	438	602530	438
					439	4180	439	7410	439	13720	439	490170	439	2880	439	1910	439	2850	439	2850	439	3730		439	2420	439	7100	439	21300	439	5960	439	9450	439	2860	439	2920		439	548280	439	540070	439	539070	439	581850	439	600660	439
					440	4590	440	7810	440	13980	440	496940	440	2780	440	2250	440	2600	440	2600	440	3730		440	2500	440	7640	440	21320	440	6840	440	10020	440	3210	440	2850		440	528980	440	516800	440	519510	440	569100	440	590950	440
					441	4810	441	8090	441	13610	441	497700	441	3010	441	2230	441	2810	441	2810	441	3470		441	2430	441	7420	441	21480	441	6350	441	10000	441	2890	441	2680		441	508610	441	481960	441	490120	441	543880	441	575240	441
					442	4970	442	8840	442	15070	442	494530	442	2860	442	2120	442	2780	442	2780	442	3570		442	2330	442	7360	442	21280	442	6700	442	9950	442	2870	442	2990		442	483880	442	442360	442	461680	442	523930	442	565280	442
					443	4720	443	8840	443	14290	443	495950	443	2870	443	2010	443	2910	443	2910	443	3480		443	2300	443	7960	443	21570	443	6830	443	10300	443	2930	443	2800		443	460370	443	409460	443	433960	443	497270	443	554240	443
					444	5150	444	8500	444	14450	444	495990	444	2740	444	1930	444	2960	444	2960	444	3680		444	2420	444	7010	444	21840	444	6540	444	9530	444	3290	444	2650		444	444830	444	380280	444	412990	444	484430	444	552150	444
					445	5060	445	8540	445	14880	445	494590	445	2780	445	2020	445	2540	445	2540	445	3520		445	2610	445	7590	445	21630	445	7090	445	10350	445	2970	445	2800		445	432260	445	359140	445	395260	445	467580	445	554020	445
					446	4710	446	8910	446	14500	446	495820	446	3220	446	2130	446	2860	446	2860	446	3790		446	2580	446	8050	446	22610	446	7240	446	10640	446	2890	446	3020		446	422730	446	336470	446	381290	446	468420	446	565880	446
					447	4800	447	8000	447	15670	447	489000	447	2840	447	2290	447	2430	447	2430	447	3730		447	2550	447	7590	447	21840	447	7010	447	10150	447	2680	447	2600		447	415630	447	323100	447	371610	447	465610	447	579440	447
					448	4940	448	8560	448	15290	448	492910	448	3080	448	2260	448	3000	448	3000	448	3810		448	2140	448	8030	448	22350	448	6830	448	10510	448	3040	448	2950		448	418100	448	311270	448	368340	448	464760	448	605920	448
					449	5430	449	8590	449	15860	449	498600	449	3070	449	2280	449	2810	449	2810	449	3660		449	2360	449	7680	449	22130	449	6700	449	10670	449	2900	449	3290		449	421280	449	303640	449	366000	449	477150	449	627650	449
					450	5420	450	8890	450	15560	450	501240	450	2650	450	2100	450	3290	450	3290	450	3950		450	2680	450	8540	450	21950	450	7460	450	10860	450	3060	450	2490		450	426900	450	299940	450	365420	450	486450	450	664290	450
					451	5300	451	9090	451	16470	451	502860	451	2850	451	2220	451	2660	451	2660	451	3450		451	2420	451	8050	451	22230	451	7100	451	10460	451	3210	451	2860		451	438720	451	304120	451	373300	451	505170	451	707210	451
					452	5830	452	9700	452	16120	452	512660	452	3440	452	2070	452	2720	452	2720	452	3750		452	2680	452	8500	452	22480	452	7000	452	11240	452	3430	452	2640		452	451640	452	304230	452	375060	452	522060	452	756100	452
					453	5530	453	8980	453	16950	453	515440	453	3080	453	2210	453	2700	453	2700	453	3610		453	2510	453	8670	453	23000	453	6710	453	11700	453	3740	453	3090		453	465800	453	306930	453	387440	453	543290	453	802890	453
					454	5850	454	9540	454	17230	454	530250	454	3260	454	2420	454	3090	454	3090	454	3510		454	2490	454	8120	454	23070	454	7660	454	11730	454	3140	454	2840		454	477460	454	313530	454	400060	454	568130	454	866350	454
					455	6330	455	10390	455	17720	455	535480	455	2880	455	2260	455	2980	455	2980	455	3780		455	2610	455	8260	455	23030	455	7920	455	11590	455	3350	455	2790		455	499760	455	318800	455	410910	455	592700	455	925220	455
					456	6220	456	10130	456	17880	456	547030	456	3630	456	2220	456	3360	456	3360	456	3900		456	2340	456	9090	456	24000	456	7660	456	11800	456	3200	456	3320		456	519420	456	325540	456	421090	456	629350	456	994420	456
					457	6590	457	10060	457	18330	457	550100	457	3290	457	2300	457	2860	457	2860	457	3660		457	2650	457	9250	457	24610	457	7780	457	12940	457	3430	457	3200		457	536820	457	331290	457	434090	457	655070	457	1063410	457
					458	5930	458	10780	458	18970	458	561980	458	3410	458	2390	458	2920	458	2920	458	4450		458	2390	458	9430	458	25380	458	7940	458	12480	458	3630	458	2920		458	558470	458	338680	458	447660	458	688540	458	1137420	458
					459	6530	459	10570	459	19700	459	568500	459	3150	459	2420	459	3490	459	3490	459	3660		459	2530	459	9300	459	24660	459	7830	459	12300	459	3380	459	3070		459	576590	459	345930	459	461570	459	718200	459	1213670	459
					460	6560	460	11710	460	19440	460	575880	460	3830	460	2610	460	2970	460	2970	460	3690		460	2640	460	9030	460	24300	460	7960	460	13890	460	3440	460	2760		460	600510	460	357720	460	480130	460	763330	460	1311960	460
					461	6760	461	11360	461	19670	461	594410	461	3710	461	2700	461	3390	461	3390	461	4170		461	2500	461	9130	461	25920	461	8530	461	13180	461	3490	461	2980		461	631670	461	359100	461	488390	461	798740	461	1400570	461
					462	6630	462	11550	462	19800	462	602590	462	3780	462	2450	462	3600	462	3600	462	3830		462	2750	462	9680	462	25470	462	8190	462	13340	462	3340	462	3130		462	647400	462	368800	462	513770	462	845070	462	1507580	462
					463	7280	463	12810	463	20480	463	612440	463	3990	463	2640	463	3400	463	3400	463	4540		463	2640	463	9900	463	25910	463	8780	463	13080	463	3320	463	2650		463	673530	463	380340	463	529250	463	886350	463	1594250	463
					464	7710	464	12060	464	20970	464	625890	464	4260	464	2430	464	3190	464	3190	464	3840		464	2580	464	9900	464	26530	464	7870	464	13960	464	3330	464	3140		464	700170	464	388410	464	546310	464	929990	464	1702210	464
					465	7480	465	12750	465	21250	465	637280	465	3800	465	2670	465	3130	465	3130	465	4300		465	2590	465	10710	465	26700	465	9310	465	14500	465	3240	465	3070		465	727620	465	399400	465	571430	465	984760	465	1822600	465
					466	8190	466	12250	466	22510	466	650430	466	3860	466	2620	466	3590	466	3590	466	4520		466	2600	466	10430	466	27220	466	9490	466	14480	466	3740	466	3350		466	759520	466	410470	466	591140	466	1034920	466	1947410	466
					467	8350	467	13010	467	22070	467	661530	467	4320	467	2790	467	3590	467	3590	467	3840		467	2470	467	11070	467	27350	467	9470	467	14650	467	3390	467	3300		467	783710	467	420030	467	611120	467	1083440	467	2051010	467
					468	8190	468	14040	468	23390	468	671580	468	3920	468	2580	468	3630	468	3630	468	3830		468	2460	468	10840	468	27880	468	9130	468	14890	468	4020	468	3250		468	814600	468	436720	468	633240	468	1149490	468	2184060	468
					469	8890	469	13740	469	23990	469	684870	469	4430	469	2460	469	3820	469	3820	469	4350		469	2990	469	10940	469	28160	469	8940	469	15790	469	3480	469	3170		469	848500	469	449890	469	659650	469	1198340	469	2315820	469
					470	9130	470	13830	470	24590	470	701120	470	4650	470	2560	470	3740	470	3740	470	4510		470	2380	470	11710	470	28640	470	9620	470	14860	470	4080	470	3000		470	879060	470	465120	470	687840	470	1264630	470	2451330	470
					471	8970	471	15290	471	25510	471	718100	471	4640	471	2620	471	3810	471	3810	471	4430		471	2760	471	11560	471	28310	471	9900	471	14650	471	3610	471	3250		471	912970	471	479930	471	710360	471	1322480	471	2580980	471
					472	9490	472	15680	472	25930	472	734880	472	4350	472	2780	472	4120	472	4120	472	4190		472	2580	472	11220	472	30340	472	9700	472	16110	472	4060	472	3280		472	939500	472	498180	472	741920	472	1388500	472	2722850	472
					473	10080	473	16210	473	27390	473	749550	473	4510	473	3150	473	4500	473	4500	473	4300		473	2710	473	12020	473	29190	473	9810	473	15860	473	3700	473	3190		473	983840	473	513200	473	773230	473	1447110	473	2867410	473
					474	10320	474	16730	474	27780	474	764360	474	4930	474	3100	474	4570	474	4570	474	4720		474	2670	474	12190	474	29900	474	10500	474	16220	474	3960	474	3480		474	1021340	474	529690	474	800040	474	1512040	474	3004840	474
					475	10140	475	16620	475	28070	475	786940	475	4930	475	3160	475	4690	475	4690	475	4550		475	3020	475	12000	475	30720	475	9890	475	16430	475	3880	475	3380		475	1049530	475	546430	475	832760	475	1587490	475	3161160	475
					476	11420	476	17690	476	30130	476	804250	476	5120	476	3010	476	4770	476	4770	476	4670		476	2990	476	12180	476	31050	476	10160	476	17530	476	4000	476	3220		476	1082610	476	559930	476	868300	476	1660290	476	3316850	476
					477	11070	477	18150	477	30920	477	818700	477	5230	477	2900	477	4270	477	4270	477	4730		477	3120	477	12820	477	32070	477	10680	477	17090	477	4060	477	3100		477	1131850	477	576350	477	899290	477	1735890	477	3492640	477
					478	11540	478	18290	478	30400	478	838060	478	5330	478	2950	478	4400	478	4400	478	4590		478	2780	478	13050	478	32880	478	10560	478	17840	478	4240	478	3220		478	1158840	478	592480	478	927720	478	1795960	478	3619280	478
					479	13050	479	19120	479	32500	479	861150	479	5310	479	3300	479	4560	479	4560	479	4440		479	3110	479	14120	479	33340	479	11340	479	18510	479	4780	479	3720		479	1196860	479	613320	479	963590	479	1882070	479	3779020	479
					480	13180	480	20150	480	32760	480	883680	480	6090	480	2830	480	5390	480	5390	480	5160		480	3540	480	13850	480	34250	480	11030	480	18940	480	4210	480	3110		480	1229220	480	622860	480	992220	480	1949610	480	3929810	480
					481	13760	481	20700	481	35120	481	901520	481	6420	481	3320	481	5520	481	5520	481	4580		481	3240	481	14230	481	35380	481	11420	481	19210	481	4350	481	3010		481	1270580	481	639460	481	1021180	481	2022610	481	4090100	481
					482	14940	482	22620	482	37290	482	927550	482	6320	482	3320	482	4810	482	4810	482	5290		482	3420	482	14530	482	36450	482	11540	482	19760	482	4490	482	3360		482	1301780	482	658760	482	1059830	482	2088060	482	4239650	482
					483	14750	483	23100	483	38400	483	951540	483	6360	483	3500	483	5800	483	5800	483	4830		483	4100	483	16100	483	38050	483	12910	483	20390	483	4600	483	3420		483	1338530	483	671350	483	1088710	483	2166030	483	4400900	483
					484	16380	484	25070	484	40060	484	983400	484	6740	484	3310	484	5820	484	5820	484	5180		484	3440	484	16330	484	41050	484	13020	484	20810	484	4970	484	3440		484	1373460	484	688350	484	1121920	484	2245360	484	4541000	484
					485	17760	485	25520	485	42090	485	1002370	485	6700	485	3690	485	6180	485	6180	485	5380		485	3780	485	17330	485	41100	485	13690	485	22190	485	4620	485	3640		485	1408410	485	703440	485	1159320	485	2313970	485	4692980	485
					486	19000	486	26500	486	44840	486	1032860	486	7560	486	3620	486	6390	486	6390	486	5610		486	3750	486	17880	486	41570	486	14160	486	23180	486	5090	486	3510		486	1445890	486	717310	486	1185110	486	2387970	486	4857900	486
					487	19210	487	28260	487	46570	487	1058970	487	7490	487	3750	487	6240	487	6240	487	5480		487	4100	487	17910	487	43780	487	14650	487	24310	487	5120	487	3510		487	1478710	487	733200	487	1225000	487	2466560	487	5006020	487
					488	20600	488	29750	488	49820	488	1088610	488	7960	488	3700	488	6210	488	6210	488	5260		488	4480	488	19560	488	45410	488	15200	488	25170	488	5400	488	3630		488	1516150	488	750070	488	1266230	488	2549710	488	5155570	488
					489	22430	489	32010	489	51670	489	1116500	489	8470	489	4210	489	6930	489	6930	489	5340		489	4750	489	20430	489	48020	489	15980	489	25780	489	5630	489	3260		489	1547620	489	759980	489	1291740	489	2609890	489	5297270	489
					490	24220	490	33710	490	54520	490	1150000	490	8580	490	4120	490	7290	490	7290	490	5700		490	5210	490	21870	490	50480	490	16210	490	28010	490	5750	490	3600		490	1587860	490	778710	490	1338130	490	2690670	490	5454240	490
					491	25240	491	36700	491	58460	491	1181200	491	9870	491	4210	491	7420	491	7420	491	5460		491	5390	491	23060	491	51830	491	16950	491	30240	491	5640	491	3360		491	1624570	491	795430	491	1373220	491	2776490	491	5626920	491
					492	28170	492	39830	492	61360	492	1219400	492	10610	492	4260	492	8110	492	8110	492	5300		492	5590	492	24910	492	54400	492	19360	492	31240	492	6430	492	3710		492	1665430	492	809650	492	1408490	492	2841410	492	5734650	492
					493	30800	493	41940	493	65940	493	1265670	493	10970	493	4420	493	8920	493	8920	493	6150		493	6220	493	25870	493	57910	493	19920	493	32980	493	6130	493	3530		493	1700150	493	823440	493	1439430	493	2933640	493	5886960	493
					494	33950	494	45590	494	72370	494	1301390	494	11270	494	4690	494	8530	494	8530	494	6340		494	7510	494	27980	494	63760	494	21880	494	35630	494	6850	494	3700		494	1743750	494	844740	494	1478710	494	2990680	494	6026640	494
					495	35810	495	49020	495	77930	495	1347230	495	12350	495	4930	495	9740	495	9740	495	6700		495	8120	495	30370	495	67320	495	24210	495	36750	495	7220	495	3620		495	1781510	495	866600	495	1517230	495	3077770	495	6163970	495
					496	40560	496	54910	496	83710	496	1395850	496	13420	496	5400	496	10270	496	10270	496	6590		496	9170	496	32740	496	72140	496	25020	496	39240	496	7740	496	4260		496	1819330	496	886020	496	1548040	496	3149070	496	6307950	496
					497	44730	497	57950	497	88130	497	1439850	497	14400	497	5860	497	10160	497	10160	497	6670		497	10280	497	34870	497	78420	497	27130	497	41980	497	7830	497	4130		497	1844290	497	900550	497	1586360	497	3220720	497	6433450	497
					498	48990	498	63230	498	96270	498	1485040	498	15710	498	5450	498	11850	498	11850	498	6850		498	11380	498	38800	498	83870	498	29110	498	45990	498	8930	498	4190		498	1882270	498	915200	498	1625060	498	3293030	498	6554300	498
					499	51150	499	69370	499	101810	499	1531780	499	16590	499	6240	499	12330	499	12330	499	7210		499	12290	499	41600	499	88920	499	31570	499	50500	499	9180	499	3700		499	1923850	499	940160	499	1669530	499	3367170	499	6686470	499
					500	56710	500	76040	500	110410	500	1572010	500	18250	500	6270	500	13860	500	13860	500	7050		500	13500	500	43980	500	94540	500	33900	500	54510	500	10130	500	4520		500	1958620	500	950300	500	1703170	500	3431660	500	6817800	500
					501	60880	501	82230	501	121310	501	1630320	501	19700	501	7660	501	14570	501	14570	501	7940		501	16020	501	49210	501	103900	501	38020	501	59250	501	10690	501	4380		501	1992820	501	969550	501	1735970	501	3502240	501	6925870	501
					502	67450	502	87510	502	129600	502	1681050	502	21570	502	7710	502	15800	502	15800	502	7640		502	17550	502	53660	502	111440	502	40540	502	63920	502	12040	502	4590		502	2033050	502	992240	502	1778870	502	3570280	502	7038660	502
					503	77480	503	96430	503	141380	503	1733150	503	23940	503	8480	503	17530	503	17530	503	7560		503	20830	503	61190	503	124760	503	44980	503	69420	503	12700	503	4350		503	2065840	503	1004460	503	1810950	503	3644300	503	7152450	503
					504	86150	504	108070	504	155180	504	1792850	504	26210	504	9020	504	18970	504	18970	504	8390		504	23080	504	67670	504	131880	504	48840	504	76800	504	14430	504	5050		504	2102350	504	1027740	504	1841680	504	3699750	504	7255370	504
					505	96600	505	117820	505	170500	505	1862180	505	29180	505	9900	505	20630	505	20630	505	9030		505	27140	505	74570	505	146370	505	56220	505	85580	505	15490	505	5230		505	2133220	505	1046980	505	1884250	505	3770920	505	7369700	505
					506	107080	506	130040	506	184420	506	1933090	506	32870	506	11100	506	23430	506	23430	506	9240		506	31860	506	82450	506	160420	506	61400	506	94500	506	17670	506	5530		506	2165590	506	1056780	506	1923380	506	3836330	506	7460990	506
					507	117810	507	144200	507	201360	507	1984030	507	34790	507	11540	507	25860	507	25860	507	9440		507	37010	507	92740	507	175430	507	68520	507	103530	507	19800	507	5620		507	2204390	507	1070150	507	1947810	507	3898590	507	7589210	507
					508	130920	508	160620	508	222940	508	2061510	508	40570	508	13630	508	27890	508	27890	508	10710		508	43330	508	102700	508	193920	508	76500	508	119570	508	23200	508	5520		508	2232030	508	1087310	508	1990040	508	3956220	508	7651550	508
					509	148560	509	179040	509	245010	509	2145640	509	45840	509	14720	509	32220	509	32220	509	11220		509	49500	509	116400	509	218510	509	87520	509	129140	509	26090	509	6420		509	2263870	509	1094550	509	2022990	509	4018210	509	7773860	509
					510	166750	510	195470	510	267440	510	2232380	510	50330	510	16990	510	35380	510	35380	510	10900		510	60630	510	128010	510	239740	510	97350	510	146670	510	29610	510	6490		510	2302840	510	1117800	510	2058300	510	4076090	510	7861520	510
					511	185440	511	218750	511	296460	511	2309230	511	56690	511	19180	511	40420	511	40420	511	11670		511	69990	511	148560	511	267790	511	110650	511	161100	511	34030	511	7270		511	2328060	511	1134610	511	2084910	511	4131710	511	7939230	511
					512	210350	512	245180	512	327820	512	2392990	512	64710	512	20770	512	46320	512	46320	512	12260		512	83790	512	169030	512	295230	512	127480	512	183410	512	38690	512	8470		512	2352580	512	1155080	512	2119250	512	4192820	512	8030710	512
					513	229990	513	269450	513	357220	513	2469730	513	72260	513	24210	513	53410	513	53410	513	13200		513	95910	513	187220	513	322040	513	144090	513	202840	513	44590	513	8200		513	2383740	513	1169890	513	2150580	513	4235060	513	8109580	513
					514	256830	514	297620	514	388790	514	2560240	514	80580	514	26190	514	57970	514	57970	514	13690		514	108190	514	210630	514	354970	514	159670	514	226010	514	52730	514	9470		514	2410260	514	1178980	514	2175880	514	4291450	514	8186150	514
					515	282780	515	321160	515	422160	515	2623550	515	89630	515	30430	515	65320	515	65320	515	14980		515	127120	515	234630	515	386860	515	178600	515	252400	515	60310	515	10750		515	2431030	515	1186580	515	2213240	515	4334890	515	8253150	515
					516	308220	516	349760	516	460650	516	2693560	516	103690	516	33690	516	74620	516	74620	516	15360		516	141680	516	260640	516	427090	516	203040	516	279260	516	68230	516	12020		516	2464290	516	1199050	516	2234500	516	4376580	516	8338570	516
					517	339000	517	381860	517	494220	517	2755770	517	113700	517	39480	517	84290	517	84290	517	17370		517	160210	517	291340	517	464610	517	222820	517	311060	517	78930	517	13090		517	2478320	517	1208170	517	2263230	517	4421870	517	8378500	517
					518	364560	518	410370	518	530250	518	2825620	518	124420	518	44300	518	93340	518	93340	518	18350		518	179250	518	323440	518	503320	518	244130	518	334380	518	90690	518	15050		518	2509600	518	1221220	518	2284920	518	4457440	518	8456020	518
					519	395990	519	445960	519	568760	519	2879170	519	141170	519	49600	519	103260	519	103260	519	20240		519	200230	519	357130	519	550080	519	276260	519	373890	519	102940	519	17190		519	2516860	519	1232260	519	2306120	519	4496620	519	8496480	519
					520	433960	520	483020	520	615660	520	2944510	520	156090	520	55450	520	118500	520	118500	520	20240		520	230040	520	396580	520	594550	520	306400	520	411680	520	119390	520	18710		520	2537000	520	1241370	520	2330440	520	4537580	520	8551310	520
					521	471070	521	520320	521	655260	521	3013890	521	173070	521	63920	521	132950	521	132950	521	22710		521	254860	521	436630	521	650060	521	334940	521	451640	521	136390	521	22080		521	2559760	521	1256940	521	2352410	521	4572470	521	8610750	521
					522	512240	522	563170	522	704960	522	3080170	522	190370	522	73200	522	151660	522	151660	522	24550		522	284090	522	486390	522	707800	522	376920	522	499250	522	155710	522	27020		522	2585610	522	1265810	522	2372850	522	4606980	522	8668600	522
					523	553130	523	610120	523	761830	523	3161750	523	214120	523	85290	523	170030	523	170030	523	27900		523	324130	523	539540	523	771980	523	418130	523	555870	523	179820	523	29190		523	2591720	523	1272200	523	2403660	523	4648500	523	8720070	523
					524	609320	524	666060	524	825030	524	3246140	524	241340	524	97650	524	193500	524	193500	524	30580		524	365710	524	603620	524	842480	524	474370	524	612760	524	208500	524	35520		524	2623700	524	1281170	524	2422690	524	4674600	524	8783250	524
					525	659260	525	724720	525	884880	525	3323890	525	271790	525	110540	525	220720	525	220720	525	34670		525	414750	525	665560	525	921630	525	525450	525	676550	525	241110	525	40600		525	2631750	525	1294900	525	2443340	525	4722250	525	8822050	525
					526	717860	526	785820	526	956280	526	3413010	526	304810	526	127510	526	250600	526	250600	526	38250		526	461080	526	738190	526	1002430	526	590980	526	748410	526	275410	526	48230		526	2654670	526	1301540	526	2461680	526	4750900	526	8878690	526
					527	783170	527	852460	527	1036400	527	3512660	527	342920	527	148080	527	284560	527	284560	527	42390		527	513710	527	824610	527	1098280	527	653090	527	830190	527	322470	527	57780		527	2674560	527	1317380	527	2489660	527	4781430	527	8904100	527
					528	835360	528	923300	528	1111220	528	3587290	528	379200	528	170210	528	320780	528	320780	528	47650		528	570700	528	904150	528	1191080	528	731380	528	912690	528	367290	528	68720		528	2687640	528	1324200	528	2514310	528	4814680	528	8961600	528
					529	896340	529	981020	529	1183460	529	3678040	529	420650	529	194330	529	366440	529	366440	529	54880		529	630070	529	992910	529	1288470	529	802330	529	995140	529	418890	529	83690		529	2708900	529	1330830	529	2531840	529	4846030	529	9016090	529
					530	960710	530	1058430	530	1270220	530	3736840	530	467710	530	223440	530	408780	530	408780	530	61440		530	684870	530	1087410	530	1383640	530	883280	530	1088640	530	483060	530	98990		530	2726240	530	1342400	530	2553130	530	4872110	530	9041920	530
					531	1017590	531	1129600	531	1339680	531	3805520	531	515450	531	251840	531	451960	531	451960	531	68700		531	739780	531	1180430	531	1474550	531	966240	531	1184270	531	535660	531	114650		531	2733620	531	1349840	531	2563490	531	4904060	531	9094650	531
					532	1084300	532	1192560	532	1427760	532	3874570	532	569720	532	286040	532	510650	532	510650	532	79680		532	797810	532	1282460	532	1581240	532	1056600	532	1287260	532	611810	532	139920		532	2742680	532	1352060	532	2599860	532	4928260	532	9125520	532
					533	1149350	533	1273380	533	1512060	533	3953920	533	627250	533	324200	533	569600	533	569600	533	89730		533	876460	533	1384500	533	1690520	533	1144920	533	1398600	533	694860	533	166500		533	2773690	533	1365350	533	2607600	533	4964170	533	9163310	533
					534	1222950	534	1352150	534	1610200	534	4021390	534	704880	534	371100	534	641310	534	641310	534	106850		534	951800	534	1515270	534	1813080	534	1267420	534	1513510	534	783840	534	197140		534	2782170	534	1377640	534	2620560	534	4996870	534	9210570	534
					535	1300560	535	1440490	535	1703220	535	4112590	535	761830	535	421680	535	716480	535	716480	535	122090		535	1027070	535	1629190	535	1919600	535	1376090	535	1640980	535	878730	535	231910		535	2792090	535	1386440	535	2654670	535	5008590	535	9237710	535
					536	1375530	536	1531180	536	1806350	536	4193920	536	848490	536	475010	536	799250	536	799250	536	139580		536	1109060	536	1776410	536	2065710	536	1501990	536	1768960	536	983560	536	272850		536	2805210	536	1394740	536	2667140	536	5029250	536	9257360	536
					537	1455300	537	1627060	537	1914720	537	4266840	537	925960	537	536270	537	889490	537	889490	537	162660		537	1185500	537	1908450	537	2183200	537	1632790	537	1903970	537	1103000	537	323140		537	2815550	537	1396130	537	2677670	537	5060910	537	9287930	537
					538	1535350	538	1721690	538	2015050	538	4338240	538	1013090	538	606100	538	984590	538	984590	538	188270		538	1269170	538	2035090	538	2316310	538	1760590	538	2050280	538	1222390	538	381490		538	2827020	538	1414330	538	2698260	538	5082580	538	9314700	538
					539	1613640	539	1806880	539	2110660	539	4399980	539	1106740	539	675570	539	1083830	539	1083830	539	221070		539	1344520	539	2171950	539	2441470	539	1871890	539	2182430	539	1340080	539	442800		539	2835370	539	1421820	539	2723520	539	5101960	539	9341810	539
					540	1669980	540	1876540	540	2202650	540	4444520	540	1193650	540	750080	540	1191240	540	1191240	540	258410		540	1420650	540	2311860	540	2565270	540	1998120	540	2312480	540	1478110	540	515760		540	2863020	540	1430330	540	2719390	540	5121870	540	9356000	540
					541	1731120	541	1955870	541	2292750	541	4495770	541	1283000	541	831560	541	1298040	541	1298040	541	299420		541	1486860	541	2433820	541	2677410	541	2125440	541	2455540	541	1611340	541	598900		541	2868830	541	1427790	541	2748820	541	5148940	541	9382890	541
					542	1792290	542	2033560	542	2371050	542	4532600	542	1375270	542	917850	542	1408550	542	1408550	542	346800		542	1545470	542	2559600	542	2790130	542	2242890	542	2575700	542	1737650	542	678320		542	2857890	542	1434040	542	2767820	542	5144590	542	9412650	542
					543	1853040	543	2095350	543	2467270	543	4597720	543	1469210	543	1008570	543	1536400	543	1536400	543	402700		543	1614390	543	2691260	543	2902170	543	2379600	543	2712020	543	1894190	543	791090		543	2874250	543	1446650	543	2772990	543	5180090	543	9421020	543
					544	1911330	544	2184220	544	2542070	544	4633560	544	1574970	544	1107470	544	1654720	544	1654720	544	466900		544	1687940	544	2826540	544	3017620	544	2500710	544	2849060	544	2041150	544	886590		544	2891860	544	1444510	544	2791470	544	5185650	544	9432600	544
					545	1976830	545	2267120	545	2637770	545	4686610	545	1687800	545	1217110	545	1806430	545	1806430	545	542640		545	1748990	545	2968150	545	3136870	545	2639650	545	2998770	545	2210090	545	1016380		545	2892810	545	1454880	545	2798560	545	5203100	545	9442460	545
					546	2034250	546	2346720	546	2733750	546	4715860	546	1793600	546	1331380	546	1936980	546	1936980	546	618620		546	1817050	546	3087500	546	3241140	546	2766120	546	3129660	546	2368080	546	1148860		546	2899400	546	1461410	546	2809160	546	5203420	546	9424960	546
					547	2085780	547	2418650	547	2803230	547	4773560	547	1900450	547	1445950	547	2087730	547	2087730	547	713570		547	1877980	547	3215490	547	3342080	547	2895560	547	3265550	547	2525430	547	1290380		547	2912060	547	1465760	547	2819880	547	5223180	547	9444340	547
					548	2145880	548	2487520	548	2897500	548	4802920	548	2026330	548	1567200	548	2231850	548	2231850	548	815660		548	1950010	548	3340240	548	3453610	548	3022650	548	3405660	548	2710740	548	1449180		548	2901650	548	1471410	548	2835270	548	5228540	548	9450450	548
					549	2199190	549	2556180	549	2974740	549	4835550	549	2142750	549	1694250	549	2397630	549	2397630	549	933610		549	1995980	549	3469570	549	3555690	549	3143340	549	3536330	549	2867440	549	1620210		549	2907220	549	1473200	549	2836870	549	5230540	549	9439770	549
					550	2246040	550	2621570	550	3048610	550	4854670	550	2243540	550	1816160	550	2533900	550	2533900	550	1052830		550	2061120	550	3578330	550	3634850	550	3262570	550	3656030	550	3037960	550	1767620		550	2915400	550	1479540	550	2849480	550	5230050	550	9451940	550
					551	2294650	551	2681550	551	3116480	551	4893170	551	2357760	551	1949930	551	2686190	551	2686190	551	1184430		551	2110610	551	3701330	551	3720160	551	3379920	551	3769210	551	3187760	551	1949510		551	2915170	551	1484170	551	2851380	551	5234470	551	9446480	551
					552	2334470	552	2742600	552	3192550	552	4912280	552	2475280	552	2070390	552	2832470	552	2832470	552	1341620		552	2163300	552	3791910	552	3809140	552	3503340	552	3894000	552	3354010	552	2129490		552	2920530	552	1490300	552	2858840	552	5244160	552	9450960	552
					553	2364440	553	2798590	553	3257510	553	4934380	553	2583440	553	2210610	553	2988910	553	2988910	553	1505520		553	2188030	553	3900410	553	3896620	553	3595470	553	4000720	553	3508020	553	2323640		553	2923400	553	1490180	553	2871960	553	5253910	553	9425730	553
					554	2404690	554	2854770	554	3299390	554	4947550	554	2691280	554	2348220	554	3144770	554	3144770	554	1676740		554	2236290	554	3987760	554	3954170	554	3699790	554	4101370	554	3647000	554	2512710		554	2922730	554	1490910	554	2875100	554	5246990	554	9420160	554
					555	2426230	555	2893310	555	3356160	555	4956690	555	2785350	555	2464680	555	3274160	555	3274160	555	1840930		555	2277590	555	4072640	555	4010320	555	3771550	555	4177880	555	3795730	555	2698530		555	2913930	555	1490420	555	2877200	555	5243480	555	9420650	555
					556	2457250	556	2933370	556	3408610	556	4981920	556	2880870	556	2589060	556	3424860	556	3424860	556	2036190		556	2306140	556	4145080	556	4082090	556	3851910	556	4273040	556	3920780	556	2904950		556	2913560	556	1492740	556	2882160	556	5245650	556	9391250	556
					557	2483700	557	2977410	557	3451940	557	4979230	557	2975040	557	2724910	557	3572590	557	3572590	557	2238490		557	2343090	557	4211170	557	4129580	557	3945730	557	4350810	557	4053760	557	3097400		557	2913790	557	1491490	557	2885690	557	5243570	557	9380210	557
					558	2503620	558	3002920	558	3488650	558	4979200	558	3077690	558	2850260	558	3680340	558	3680340	558	2432720		558	2365480	558	4275170	558	4161000	558	4007640	558	4423920	558	4178560	558	3285870		558	2908040	558	1502380	558	2889980	558	5235320	558	9354320	558
					559	2514740	559	3039050	559	3536580	559	4986240	559	3150460	559	2973170	559	3820940	559	3820940	559	2648350		559	2383910	559	4336030	559	4213830	559	4069840	559	4494770	559	4285290	559	3477420		559	2917670	559	1493130	559	2888380	559	5228450	559	9345290	559
					560	2531520	560	3059450	560	3556910	560	4965960	560	3228000	560	3078570	560	3943210	560	3943210	560	2855110		560	2410840	560	4387540	560	4248340	560	4134070	560	4557290	560	4401100	560	3646390		560	2903750	560	1495110	560	2885940	560	5220410	560	9312380	560
					561	2541890	561	3084070	561	3579610	561	4973990	561	3311380	561	3184360	561	4046900	561	4046900	561	3079780		561	2418060	561	4444360	561	4271610	561	4173270	561	4603850	561	4483670	561	3838950		561	2899340	561	1495040	561	2897080	561	5223890	561	9288050	561
					562	2549160	562	3093760	562	3606870	562	4958160	562	3371870	562	3283820	562	4149990	562	4149990	562	3289690		562	2435190	562	4471870	562	4292400	562	4228730	562	4645030	562	4579490	562	4003580		562	2900490	562	1492830	562	2898700	562	5201500	562	9264710	562
					563	2562750	563	3110930	563	3624170	563	4957230	563	3444410	563	3401770	563	4251400	563	4251400	563	3517930		563	2444980	563	4497540	563	4315280	563	4273890	563	4689510	563	4664220	563	4176970		563	2885550	563	1491390	563	2889520	563	5203280	563	9230520	563
					564	2558550	564	3125260	564	3643800	564	4936790	564	3496200	564	3491870	564	4349710	564	4349710	564	3747850		564	2436720	564	4531680	564	4339020	564	4296830	564	4728920	564	4736110	564	4336120		564	2886280	564	1488530	564	2897140	564	5183030	564	9218290	564
					565	2562820	565	3134470	565	3644190	565	4920080	565	3553530	565	3590470	565	4429870	565	4429870	565	3952940		565	2457380	565	4551830	565	4350250	565	4323680	565	4758200	565	4786820	565	4476070		565	2883720	565	1488690	565	2892890	565	5165090	565	9177280	565
					566	2545830	566	3140340	566	3659570	566	4918090	566	3602950	566	3659520	566	4520520	566	4520520	566	4176320		566	2451520	566	4584450	566	4352590	566	4355290	566	4773120	566	4861410	566	4614200		566	2869540	566	1485590	566	2881700	566	5152530	566	9161910	566
					567	2548510	567	3139740	567	3670450	567	4895390	567	3645210	567	3751290	567	4595780	567	4595780	567	4390720		567	2451410	567	4591060	567	4355960	567	4378570	567	4786520	567	4922540	567	4743700		567	2849920	567	1486300	567	2874780	567	5137270	567	9110080	567
					568	2540770	568	3130790	568	3663540	568	4863940	568	3678630	568	3816810	568	4661830	568	4661830	568	4602360		568	2452760	568	4592800	568	4350760	568	4395350	568	4799930	568	4960540	568	4882350		568	2857540	568	1483920	568	2874630	568	5126990	568	9096510	568
					569	2543920	569	3129200	569	3656040	569	4857450	569	3718470	569	3887580	569	4729130	569	4729130	569	4796530		569	2436430	569	4606010	569	4343570	569	4394960	569	4814480	569	4988650	569	4999950		569	2836990	569	1484820	569	2873290	569	5108800	569	9051340	569
					570	2529510	570	3130910	570	3655390	570	4830780	570	3764150	570	3951500	570	4785860	570	4785860	570	5003500		570	2437360	570	4598800	570	4344430	570	4404310	570	4823570	570	5040750	570	5123260		570	2827180	570	1483850	570	2858020	570	5086480	570	9025100	570
					571	2511850	571	3118010	571	3645390	571	4800810	571	3777940	571	4000100	571	4831150	571	4831150	571	5173320		571	2438210	571	4590060	571	4326730	571	4403470	571	4819370	571	5061380	571	5218050		571	2818400	571	1472410	571	2853870	571	5069120	571	8980710	571
					572	2503120	572	3110420	572	3640440	572	4777340	572	3798570	572	4049930	572	4880300	572	4880300	572	5353960		572	2423140	572	4595580	572	4314200	572	4390040	572	4811560	572	5069050	572	5296730		572	2817350	572	1467900	572	2850430	572	5044620	572	8931220	572
					573	2499890	573	3107080	573	3632760	573	4753870	573	3813450	573	4104780	573	4917670	573	4917670	573	5532400		573	2408330	573	4594090	573	4297900	573	4396500	573	4809460	573	5099520	573	5401780		573	2806750	573	1461730	573	2850810	573	5013300	573	8908000	573
					574	2480300	574	3099050	574	3618210	574	4722920	574	3836550	574	4137810	574	4954630	574	4954630	574	5713490		574	2409190	574	4586860	574	4292570	574	4393640	574	4809580	574	5117300	574	5476380		574	2785180	574	1459970	574	2829780	574	4996160	574	8859720	574
					575	2459820	575	3084000	575	3605020	575	4696180	575	3856090	575	4190760	575	4975190	575	4975190	575	5876510		575	2401450	575	4570490	575	4264960	575	4386860	575	4791460	575	5137850	575	5539550		575	2789470	575	1450020	575	2828020	575	4989880	575	8811340	575
					576	2452730	576	3062670	576	3595540	576	4666880	576	3864410	576	4215390	576	5000740	576	5000740	576	6016210		576	2384500	576	4547740	576	4249230	576	4369550	576	4783600	576	5126610	576	5600350		576	2759340	576	1454000	576	2818230	576	4958600	576	8774670	576
					577	2435630	577	3045710	577	3572860	577	4626590	577	3870600	577	4235490	577	5023960	577	5023960	577	6164180		577	2364250	577	4543470	577	4235620	577	4353890	577	4756070	577	5131750	577	5663460		577	2752740	577	1448180	577	2805860	577	4937040	577	8738020	577
					578	2418310	578	3030500	578	3556190	578	4611410	578	3860250	578	4258310	578	5041400	578	5041400	578	6280890		578	2360340	578	4513590	578	4201050	578	4332200	578	4743880	578	5135470	578	5701150		578	2739860	578	1446190	578	2806740	578	4917150	578	8687820	578
					579	2408820	579	3010700	579	3540230	579	4569190	579	3860750	579	4264980	579	5047820	579	5047820	579	6414420		579	2345630	579	4485010	579	4176490	579	4314720	579	4716910	579	5130170	579	5753790		579	2728080	579	1436640	579	2791270	579	4877690	579	8625870	579
					580	2376500	580	2990200	580	3522710	580	4538360	580	3874350	580	4299830	580	5052820	580	5052820	580	6531730		580	2323730	580	4469060	580	4142310	580	4299400	580	4693380	580	5119600	580	5786670		580	2713160	580	1440560	580	2783480	580	4857600	580	8591180	580
					581	2359380	581	2983770	581	3500670	581	4501200	581	3872140	581	4304790	581	5054730	581	5054730	581	6647620		581	2303970	581	4446540	581	4117440	581	4275650	581	4656620	581	5118770	581	5808960		581	2695080	581	1422170	581	2764410	581	4833710	581	8545380	581
					582	2327510	582	2956120	582	3483110	582	4475600	582	3861710	582	4317800	582	5055390	582	5055390	582	6745010		582	2295540	582	4410780	582	4088680	582	4251960	582	4630620	582	5080960	582	5857350		582	2679280	582	1422400	582	2765640	582	4804620	582	8497740	582
					583	2318770	583	2930350	583	3449020	583	4447880	583	3848950	583	4321700	583	5061810	583	5061810	583	6838020		583	2284620	583	4380260	583	4055570	583	4229310	583	4608400	583	5062160	583	5860380		583	2662390	583	1413700	583	2757800	583	4782040	583	8444650	583
					584	2293630	584	2902460	584	3426900	584	4401110	584	3837060	584	4327210	584	5043800	584	5043800	584	6919100		584	2260310	584	4362870	584	4025800	584	4199150	584	4591350	584	5050720	584	5880250		584	2652800	584	1403310	584	2727220	584	4750180	584	8390210	584
					585	2280930	585	2888470	585	3392370	585	4366030	585	3825520	585	4333380	585	5043280	585	5043280	585	7004640		585	2238570	585	4327500	585	3994040	585	4162220	585	4552150	585	5020580	585	5883830		585	2635910	585	1399770	585	2722230	585	4719790	585	8335070	585
					586	2259940	586	2869270	586	3363460	586	4332270	586	3814590	586	4324460	586	5020740	586	5020740	586	7060060		586	2222970	586	4298260	586	3970070	586	4140100	586	4520850	586	5004310	586	5879960		586	2629920	586	1389900	586	2722530	586	4693660	586	8289010	586
					587	2236220	587	2843030	587	3349600	587	4295340	587	3799920	587	4327850	587	5010160	587	5010160	587	7131140		587	2210540	587	4264600	587	3928930	587	4108130	587	4488260	587	4978330	587	5894010		587	2610320	587	1388060	587	2692460	587	4665390	587	8229730	587
					588	2214760	588	2812000	588	3317290	588	4258210	588	3788530	588	4306070	588	4996510	588	4996510	588	7184490		588	2187410	588	4227040	588	3877330	588	4078380	588	4447070	588	4953220	588	5887350		588	2589280	588	1376500	588	2685800	588	4624970	588	8189260	588
					589	2193520	589	2788040	589	3284540	589	4215790	589	3759560	589	4302720	589	4971640	589	4971640	589	7223910		589	2166010	589	4192690	589	3861280	589	4046550	589	4422170	589	4912070	589	5895290		589	2569530	589	1365380	589	2673500	589	4602370	589	8121390	589
					590	2165090	590	2753570	590	3245640	590	4181760	590	3735730	590	4292320	590	4944080	590	4944080	590	7275630		590	2147500	590	4158860	590	3821050	590	4008040	590	4367790	590	4886860	590	5875360		590	2549900	590	1366750	590	2652770	590	4578760	590	8072700	590
					591	2143520	591	2737950	591	3238360	591	4150990	591	3703350	591	4263980	591	4913730	591	4913730	591	7313130		591	2122630	591	4122500	591	3792790	591	3976410	591	4336590	591	4872250	591	5874690		591	2536810	591	1358910	591	2657100	591	4543630	591	8009850	591
					592	2116670	592	2711890	592	3189350	592	4102690	592	3697970	592	4245370	592	4890090	592	4890090	592	7356040		592	2105340	592	4083200	592	3752460	592	3945220	592	4286910	592	4809920	592	5841680		592	2526060	592	1348710	592	2630030	592	4510080	592	7948530	592
					593	2093500	593	2677920	593	3163280	593	4057360	593	3661740	593	4230820	593	4861100	593	4861100	593	7383090		593	2082840	593	4040510	593	3702850	593	3898920	593	4251640	593	4786810	593	5825530		593	2495710	593	1337020	593	2616720	593	4459890	593	7893520	593
					594	2061960	594	2647980	594	3134650	594	4020430	594	3642330	594	4206180	594	4823630	594	4823630	594	7384930		594	2066010	594	4005040	594	3671300	594	3860420	594	4207730	594	4730200	594	5796780		594	2482680	594	1326690	594	2603290	594	4425210	594	7819830	594
					595	2035620	595	2616840	595	3095630	595	3975050	595	3615180	595	4187740	595	4795340	595	4795340	595	7417880		595	2028250	595	3960270	595	3638150	595	3823740	595	4178470	595	4703190	595	5770710		595	2467230	595	1322060	595	2578760	595	4400530	595	7762070	595
					596	2010960	596	2588750	596	3049730	596	3930030	596	3574900	596	4158230	596	4760040	596	4760040	596	7420620		596	2021040	596	3916560	596	3590700	596	3786200	596	4128730	596	4672220	596	5738940		596	2441470	596	1304230	596	2561860	596	4369260	596	7702870	596
					597	1987430	597	2550960	597	3022810	597	3897440	597	3549790	597	4110860	597	4711820	597	4711820	597	7429680		597	1994020	597	3884130	597	3553120	597	3738940	597	4077280	597	4622160	597	5701320		597	2419910	597	1304000	597	2554200	597	4333250	597	7631000	597
					598	1959510	598	2528960	598	2989970	598	3849590	598	3537720	598	4093570	598	4675420	598	4675420	598	7429370		598	1976440	598	3831920	598	3502260	598	3699230	598	4030700	598	4581320	598	5684940		598	2395970	598	1284500	598	2527100	598	4293450	598	7590690	598
					599	1937690	599	2497610	599	2959400	599	3814740	599	3495590	599	4071490	599	4624490	599	4624490	599	7423440		599	1950050	599	3794880	599	3459320	599	3660350	599	3984710	599	4536870	599	5657850		599	2381490	599	1285990	599	2510870	599	4252530	599	7508710	599
					600	1903580	600	2476680	600	2917580	600	3766210	600	3458210	600	4036050	600	4596630	600	4596630	600	7424070		600	1928210	600	3743330	600	3431490	600	3616000	600	3940710	600	4492630	600	5613750		600	2359560	600	1272210	600	2485700	600	4201620	600	7451430	600
					601	1885420	601	2437710	601	2886450	601	3733610	601	3429430	601	3994150	601	4549440	601	4549440	601	7403300		601	1901590	601	3691680	601	3383440	601	3580950	601	3904010	601	4453780	601	5574440		601	2337040	601	1260640	601	2472770	601	4176230	601	7370340	601
					602	1860040	602	2411000	602	2859630	602	3683450	602	3399350	602	3963460	602	4521220	602	4521220	602	7394150		602	1875740	602	3671990	602	3340470	602	3533810	602	3862510	602	4384020	602	5535440		602	2332140	602	1245930	602	2450150	602	4141950	602	7298060	602
					603	1828370	603	2378370	603	2812580	603	3643380	603	3359720	603	3929460	603	4456660	603	4456660	603	7361910		603	1859920	603	3618580	603	3300960	603	3494870	603	3802970	603	4344790	603	5486780		603	2297530	603	1237250	603	2439820	603	4100940	603	7229830	603
					604	1807560	604	2351640	604	2779930	604	3597120	604	3324220	604	3893070	604	4429250	604	4429250	604	7342360		604	1825090	604	3578470	604	3266250	604	3449990	604	3758580	604	4298020	604	5435610		604	2281540	604	1230280	604	2417640	604	4064410	604	7168110	604
					605	1783750	605	2313160	605	2741260	605	3551030	605	3282970	605	3864840	605	4368040	605	4368040	605	7311300		605	1804550	605	3533340	605	3216480	605	3411010	605	3720420	605	4255040	605	5410960		605	2263450	605	1221650	605	2396640	605	4017360	605	7105100	605
					606	1750160	606	2274920	606	2710360	606	3520390	606	3253510	606	3820300	606	4326240	606	4326240	606	7292650		606	1785090	606	3486060	606	3182160	606	3375460	606	3663120	606	4215970	606	5357350		606	2238240	606	1205960	606	2376340	606	3983230	606	7024930	606
					607	1732380	607	2245360	607	2671330	607	3469770	607	3205530	607	3784970	607	4275590	607	4275590	607	7249990		607	1763210	607	3441840	607	3130140	607	3327100	607	3613090	607	4156020	607	5304780		607	2211540	607	1200390	607	2363130	607	3949730	607	6957480	607
					608	1707270	608	2221140	608	2636400	608	3427810	608	3174070	608	3751820	608	4244780	608	4244780	608	7211090		608	1739490	608	3402850	608	3088760	608	3287080	608	3578830	608	4109280	608	5269130		608	2203730	608	1181670	608	2343060	608	3903130	608	6890740	608
					609	1679300	609	2190120	609	2601110	609	3382390	609	3152930	609	3698920	609	4185290	609	4185290	609	7174150		609	1713210	609	3353320	609	3056090	609	3232110	609	3531910	609	4065150	609	5220180		609	2175260	609	1177420	609	2317970	609	3875750	609	6828440	609
					610	1658700	610	2162090	610	2560800	610	3343670	610	3103640	610	3668360	610	4128670	610	4128670	610	7145820		610	1703040	610	3310240	610	3008140	610	3200870	610	3484310	610	4016630	610	5161270		610	2165600	610	1156920	610	2298860	610	3827620	610	6741480	610
					611	1629830	611	2130140	611	2529980	611	3303970	611	3061100	611	3628930	611	4090570	611	4090570	611	7082470		611	1675650	611	3277450	611	2971370	611	3150010	611	3436790	611	3973780	611	5114680		611	2138850	611	1154720	611	2277530	611	3782790	611	6664060	611
					612	1602690	612	2101290	612	2500880	612	3255670	612	3040280	612	3591180	612	4065100	612	4065100	612	7050540		612	1651920	612	3241590	612	2933330	612	3119510	612	3389570	612	3916690	612	5083800		612	2110860	612	1138920	612	2255900	612	3748960	612	6599930	612
					613	1578150	613	2080170	613	2460570	613	3222260	613	3005780	613	3552190	613	3997960	613	3997960	613	7021840		613	1632440	613	3190920	613	2902500	613	3067820	613	3341660	613	3890680	613	5038650		613	2101060	613	1133750	613	2242410	613	3704860	613	6520800	613
					614	1560820	614	2046450	614	2432370	614	3171590	614	2968250	614	3515650	614	3965500	614	3965500	614	6956340		614	1611240	614	3139280	614	2852270	614	3032440	614	3300170	614	3818580	614	4996470		614	2074460	614	1112330	614	2220190	614	3678400	614	6462720	614
					615	1532110	615	2012110	615	2395820	615	3141530	615	2925110	615	3476780	615	3912830	615	3912830	615	6919010		615	1580320	615	3100530	615	2805310	615	2988650	615	3242790	615	3772350	615	4926320		615	2049850	615	1115820	615	2213450	615	3638360	615	6395680	615
					616	1509040	616	1982830	616	2351680	616	3097140	616	2893740	616	3427520	616	3855060	616	3855060	616	6869240		616	1560420	616	3053050	616	2768280	616	2959050	616	3204740	616	3732670	616	4862400		616	2027020	616	1097620	616	2179900	616	3601190	616	6326380	616
					617	1484330	617	1946620	617	2326300	617	3056040	617	2842570	617	3383610	617	3789420	617	3789420	617	6800200		617	1535220	617	3005410	617	2714540	617	2900820	617	3156980	617	3674490	617	4811130		617	2003820	617	1082930	617	2165480	617	3563950	617	6250270	617
					618	1461810	618	1918780	618	2281700	618	3017100	618	2795060	618	3321780	618	3740450	618	3740450	618	6750990		618	1506900	618	2957540	618	2689330	618	2859840	618	3103330	618	3616610	618	4747140		618	1986060	618	1070510	618	2143080	618	3520130	618	6200440	618
					619	1437940	619	1884070	619	2240750	619	2976180	619	2758080	619	3288260	619	3678430	619	3678430	619	6700330		619	1485940	619	2926650	619	2641110	619	2809840	619	3052410	619	3559000	619	4695330		619	1966250	619	1067990	619	2118760	619	3481440	619	6109880	619
					620	1409090	620	1850690	620	2201080	620	2936360	620	2708330	620	3235960	620	3623660	620	3623660	620	6628550		620	1465440	620	2871820	620	2591850	620	2761710	620	3002310	620	3506750	620	4637390		620	1955070	620	1051230	620	2099100	620	3440110	620	6056320	620
					621	1379660	621	1830680	621	2177790	621	2895630	621	2678670	621	3180170	621	3578340	621	3578340	621	6578900		621	1444410	621	2834380	621	2564430	621	2718100	621	2966900	621	3459760	621	4572730		621	1928210	621	1041730	621	2081660	621	3410700	621	5981110	621
					622	1362890	622	1796560	622	2128400	622	2856660	622	2638150	622	3146190	622	3522310	622	3522310	622	6527110		622	1414630	622	2790490	622	2524840	622	2683280	622	2910420	622	3414510	622	4520120		622	1897680	622	1033890	622	2058700	622	3364880	622	5928020	622
					623	1341450	623	1761360	623	2103780	623	2817330	623	2596110	623	3100400	623	3466190	623	3466190	623	6465350		623	1390190	623	2746200	623	2479180	623	2643580	623	2880440	623	3357560	623	4468600		623	1881110	623	1021020	623	2040120	623	3331130	623	5856800	623
					624	1316420	624	1736180	624	2072900	624	2779250	624	2570310	624	3060860	624	3417420	624	3417420	624	6398450		624	1373190	624	2700910	624	2441310	624	2594740	624	2833130	624	3318320	624	4399770		624	1863040	624	1008760	624	2015320	624	3301280	624	5797680	624
					625	1299560	625	1703120	625	2037010	625	2739300	625	2519280	625	3011570	625	3372640	625	3372640	625	6338510		625	1357220	625	2674810	625	2405920	625	2562350	625	2785320	625	3271300	625	4359380		625	1840720	625	1001950	625	1997240	625	3252840	625	5705730	625
					626	1282890	626	1686850	626	2009390	626	2704520	626	2486520	626	2975240	626	3336500	626	3336500	626	6288670		626	1335540	626	2627310	626	2371070	626	2521660	626	2747890	626	3216730	626	4304970		626	1820660	626	993940	626	1974000	626	3222020	626	5649290	626
					627	1262290	627	1656460	627	1975130	627	2665710	627	2445070	627	2938650	627	3268920	627	3268920	627	6212500		627	1310170	627	2586690	627	2338600	627	2484870	627	2700280	627	3170470	627	4247480		627	1794890	627	971870	627	1965970	627	3173290	627	5570180	627
					628	1228880	628	1634270	628	1940320	628	2627340	628	2415510	628	2882820	628	3223540	628	3223540	628	6150880		628	1294300	628	2547930	628	2292730	628	2456550	628	2656930	628	3131200	628	4196320		628	1772510	628	970470	628	1940050	628	3134540	628	5512340	628
					629	1212600	629	1604750	629	1909740	629	2593560	629	2384470	629	2842760	629	3186930	629	3186930	629	6101590		629	1275610	629	2514630	629	2259290	629	2406990	629	2618340	629	3082290	629	4150340		629	1757730	629	955380	629	1916920	629	3103200	629	5450630	629
					630	1199070	630	1585490	630	1885110	630	2561680	630	2340580	630	2819450	630	3130940	630	3130940	630	6029180		630	1250760	630	2470900	630	2239610	630	2383440	630	2589470	630	3035250	630	4107160		630	1728520	630	947330	630	1899540	630	3068850	630	5387590	630
					631	1184520	631	1547580	631	1856290	631	2520240	631	2307920	631	2774760	631	3086540	631	3086540	631	5972420		631	1233740	631	2433730	631	2199290	631	2341810	631	2539210	631	2991730	631	4039540		631	1726330	631	940540	631	1879380	631	3026680	631	5316770	631
					632	1162820	632	1531420	632	1829610	632	2484340	632	2281050	632	2743390	632	3048090	632	3048090	632	5930700		632	1218520	632	2399560	632	2163080	632	2307600	632	2501920	632	2957750	632	4005990		632	1699710	632	932980	632	1852200	632	2999350	632	5240150	632
					633	1134330	633	1505570	633	1798360	633	2454580	633	2244320	633	2703240	633	2996560	633	2996560	633	5859260		633	1199800	633	2366170	633	2125910	633	2266400	633	2469720	633	2924060	633	3945030		633	1673660	633	921750	633	1840880	633	2959740	633	5181110	633
					634	1118790	634	1479590	634	1766830	634	2411720	634	2223820	634	2661500	634	2960310	634	2960310	634	5786480		634	1179970	634	2328590	634	2092240	634	2235970	634	2428320	634	2873210	634	3888580		634	1656620	634	913970	634	1816960	634	2918850	634	5123010	634
					635	1097830	635	1455640	635	1739950	635	2371690	635	2188790	635	2627050	635	2917690	635	2917690	635	5747680		635	1163690	635	2290910	635	2057170	635	2193000	635	2394370	635	2835420	635	3856530		635	1637070	635	900100	635	1804010	635	2886920	635	5061880	635
					636	1081390	636	1437470	636	1714940	636	2343650	636	2156020	636	2584330	636	2878330	636	2878330	636	5676480		636	1145820	636	2258210	636	2038650	636	2166000	636	2348960	636	2794000	636	3797160		636	1615020	636	886680	636	1779810	636	2857430	636	5002960	636
					637	1062490	637	1410060	637	1681630	637	2308240	637	2120090	637	2544430	637	2831460	637	2831460	637	5597020		637	1123190	637	2218260	637	1994980	637	2127330	637	2321620	637	2743040	637	3745820		637	1597660	637	878300	637	1760450	637	2814620	637	4929840	637
					638	1040420	638	1391160	638	1648350	638	2283560	638	2084580	638	2511480	638	2773070	638	2773070	638	5546190		638	1109220	638	2184690	638	1966620	638	2085910	638	2284680	638	2700300	638	3713940		638	1567500	638	868670	638	1737730	638	2780760	638	4857680	638
					639	1023760	639	1362470	639	1626880	639	2244840	639	2054130	639	2478340	639	2734110	639	2734110	639	5479410		639	1086490	639	2148190	639	1928430	639	2053690	639	2243970	639	2666470	639	3657720		639	1550770	639	856430	639	1720670	639	2744860	639	4803940	639
					640	1009530	640	1347920	640	1600760	640	2207000	640	2023130	640	2429450	640	2701150	640	2701150	640	5413950		640	1060660	640	2114950	640	1895890	640	2022890	640	2198050	640	2622640	640	3595110		640	1536390	640	845820	640	1698050	640	2711370	640	4736110	640
					641	986350	641	1314840	641	1572650	641	2178530	641	1992070	641	2397240	641	2664930	641	2664930	641	5348800		641	1053000	641	2079900	641	1864810	641	1989580	641	2162630	641	2577400	641	3552190		641	1512640	641	836510	641	1676190	641	2678370	641	4664040	641
					642	969480	642	1293270	642	1547900	642	2143240	642	1955100	642	2362590	642	2609330	642	2609330	642	5279750		642	1031740	642	2043890	642	1830080	642	1959060	642	2133540	642	2539950	642	3503740		642	1491820	642	827780	642	1654400	642	2649240	642	4592550	642
					643	948840	643	1270430	643	1520080	643	2108250	643	1923480	643	2325440	643	2570460	643	2570460	643	5229160		643	1012680	643	2005340	643	1794210	643	1926180	643	2091980	643	2486470	643	3459760		643	1470650	643	817680	643	1630190	643	2604260	643	4542460	643
					644	933480	644	1252530	644	1500430	644	2075940	644	1892610	644	2279520	644	2530500	644	2530500	644	5143100		644	995190	644	1966580	644	1774580	644	1898300	644	2053820	644	2457750	644	3401720		644	1448690	644	803060	644	1623720	644	2571630	644	4482040	644
					645	916280	645	1227470	645	1467350	645	2041090	645	1862920	645	2261970	645	2485690	645	2485690	645	5089260		645	978740	645	1944730	645	1741380	645	1857620	645	2019620	645	2415490	645	3358980		645	1423710	645	787770	645	1591550	645	2528600	645	4409350	645
					646	898930	646	1197030	646	1436940	646	2007080	646	1830010	646	2213630	646	2448170	646	2448170	646	5011460		646	958650	646	1902120	646	1708680	646	1822980	646	1982130	646	2368440	646	3304810		646	1410040	646	781230	646	1574280	646	2501850	646	4343050	646
					647	882600	647	1180090	647	1408600	647	1981070	647	1802030	647	2179820	647	2399620	647	2399620	647	4953460		647	940730	647	1873030	647	1677100	647	1789830	647	1950620	647	2338420	647	3256080		647	1389240	647	772170	647	1556400	647	2465960	647	4281400	647
					648	868050	648	1160520	648	1384890	648	1952410	648	1762650	648	2143740	648	2358880	648	2358880	648	4890880		648	927960	648	1834910	648	1642790	648	1762630	648	1914560	648	2290060	648	3198880		648	1366200	648	758350	648	1529630	648	2421820	648	4211870	648
					649	845060	649	1138060	649	1360300	649	1905370	649	1738970	649	2106440	649	2321660	649	2321660	649	4809500		649	911190	649	1806920	649	1613250	649	1722170	649	1878910	649	2259000	649	3151690		649	1343470	649	744710	649	1512730	649	2378770	649	4153850	649
					650	833460	650	1114370	650	1338250	650	1875650	650	1711800	650	2071400	650	2280340	650	2280340	650	4750710		650	891530	650	1769600	650	1589440	650	1691390	650	1841370	650	2208530	650	3092790		650	1316810	650	734810	650	1495240	650	2351920	650	4077550	650
					651	814190	651	1095060	651	1315370	651	1846600	651	1681140	651	2039600	651	2242010	651	2242010	651	4674880		651	879350	651	1735120	651	1548640	651	1659570	651	1814240	651	2179050	651	3054630		651	1303160	651	727830	651	1472590	651	2303830	651	4015620	651
					652	800620	652	1073970	652	1290420	652	1817280	652	1655160	652	2004140	652	2203790	652	2203790	652	4609130		652	853890	652	1701220	652	1530050	652	1637720	652	1772620	652	2146860	652	3012330		652	1281690	652	711990	652	1451060	652	2269970	652	3939470	652
					653	786930	653	1052040	653	1260980	653	1784300	653	1623610	653	1967090	653	2153230	653	2153230	653	4543320		653	845010	653	1669590	653	1491350	653	1606320	653	1742630	653	2103010	653	2946010		653	1261990	653	703510	653	1426030	653	2236120	653	3881890	653
					654	771010	654	1029590	654	1230920	654	1748350	654	1594960	654	1937660	654	2118200	654	2118200	654	4471810		654	820130	654	1633740	654	1468460	654	1571750	654	1705550	654	2052740	654	2907480		654	1237650	654	691210	654	1405050	654	2201600	654	3815930	654
					655	753560	655	1012460	655	1214700	655	1714470	655	1571100	655	1896560	655	2085000	655	2085000	655	4409970		655	812120	655	1608230	655	1434860	655	1546030	655	1669230	655	2025470	655	2864620		655	1211910	655	682250	655	1384120	655	2164080	655	3735340	655
					656	741980	656	993300	656	1188660	656	1695840	656	1538400	656	1864510	656	2048800	656	2048800	656	4344500		656	796540	656	1572330	656	1410300	656	1512840	656	1640210	656	1987910	656	2813960		656	1197330	656	665600	656	1361990	656	2125850	656	3685000	656
					657	719990	657	975400	657	1172900	657	1652620	657	1512930	657	1839050	657	2011830	657	2011830	657	4264320		657	774280	657	1542040	657	1381690	657	1479990	657	1612150	657	1952290	657	2770550		657	1172630	657	658490	657	1333590	657	2088960	657	3613770	657
					658	712450	658	953280	658	1152040	658	1631300	658	1484890	658	1807030	658	1973630	658	1973630	658	4206660		658	765690	658	1519170	658	1354990	658	1451890	658	1576470	658	1901330	658	2722750		658	1154300	658	651610	658	1324260	658	2049820	658	3546360	658
					659	697430	659	937850	659	1119030	659	1599620	659	1464100	659	1778140	659	1936460	659	1936460	659	4140910		659	749910	659	1488370	659	1323520	659	1421130	659	1549380	659	1875960	659	2674460		659	1135830	659	638130	659	1294720	659	2021560	659	3492200	659
					660	675730	660	917450	660	1093510	660	1568670	660	1431850	660	1739890	660	1897480	660	1897480	660	4067570		660	736720	660	1452910	660	1295370	660	1395600	660	1511630	660	1833130	660	2636660		660	1111150	660	621570	660	1273480	660	1989710	660	3414620	660
					661	664910	661	894590	661	1077200	661	1535110	661	1408450	661	1704830	661	1859150	661	1859150	661	4003920		661	721950	661	1418480	661	1268020	661	1369670	661	1492740	661	1808180	661	2585420		661	1090500	661	613070	661	1263990	661	1945430	661	3359150	661
					662	648750	662	881880	662	1058400	662	1503150	662	1379680	662	1679690	662	1829990	662	1829990	662	3933440		662	701370	662	1395980	662	1244020	662	1337250	662	1450370	662	1775200	662	2540480		662	1077830	662	605730	662	1234530	662	1924590	662	3300010	662
					663	632430	663	863130	663	1037670	663	1477740	663	1361590	663	1650900	663	1790790	663	1790790	663	3874860		663	686310	663	1372580	663	1214280	663	1310550	663	1415170	663	1727440	663	2486520		663	1053310	663	594490	663	1212470	663	1877600	663	3230100	663
					664	622140	664	838630	664	1007090	664	1451950	664	1329640	664	1608150	664	1766750	664	1766750	664	3815950		664	673030	664	1343800	664	1187630	664	1281270	664	1395700	664	1698420	664	2446150		664	1025780	664	589270	664	1192440	664	1844550	664	3169180	664
					665	603710	665	824520	665	995340	665	1422560	665	1306000	665	1585540	665	1723060	665	1723060	665	3733800		665	658270	665	1313110	665	1162500	665	1252830	665	1364460	665	1669720	665	2412780		665	1014340	665	572110	665	1176320	665	1801080	665	3121350	665
					666	595500	666	804340	666	964150	666	1385770	666	1271100	666	1554570	666	1686870	666	1686870	666	3681140		666	645640	666	1279100	666	1144290	666	1227960	666	1329240	666	1636420	666	2358040		666	992340	666	563780	666	1152860	666	1771570	666	3047090	666
					667	576920	667	787420	667	949150	667	1365060	667	1252580	667	1519720	667	1651220	667	1651220	667	3602490		667	632060	667	1249050	667	1115550	667	1202540	667	1304100	667	1599210	667	2308620		667	967750	667	552620	667	1131970	667	1746620	667	3000270	667
					668	567470	668	760950	668	920820	668	1333710	668	1223210	668	1490930	668	1613850	668	1613850	668	3553570		668	614900	668	1226200	668	1091190	668	1175330	668	1269050	668	1562760	668	2265450		668	954850	668	549390	668	1115930	668	1711750	668	2934530	668
					669	550870	669	756250	669	904550	669	1309790	669	1200160	669	1452820	669	1581560	669	1581560	669	3486080		669	599280	669	1202230	669	1066620	669	1145420	669	1243930	669	1526330	669	2222800		669	936930	669	533810	669	1092250	669	1682990	669	2879160	669
					670	544760	670	732350	670	884950	670	1284510	670	1172150	670	1425810	670	1545940	670	1545940	670	3419320		670	585920	670	1173020	670	1043840	670	1125100	670	1215710	670	1491710	670	2175820		670	916550	670	520850	670	1068030	670	1642910	670	2825220	670
					671	533480	671	720780	671	861810	671	1252840	671	1143760	671	1398350	671	1507040	671	1507040	671	3364860		671	571930	671	1142310	671	1016580	671	1094940	671	1187750	671	1461250	671	2125560		671	901360	671	514890	671	1054920	671	1612820	671	2770260	671
					672	516580	672	700730	672	840150	672	1226850	672	1119650	672	1371460	672	1484560	672	1484560	672	3295300		672	559580	672	1116150	672	995330	672	1069540	672	1160270	672	1430540	672	2088270		672	879070	672	502610	672	1042520	672	1579890	672	2710440	672
					673	501090	673	682940	673	820230	673	1191730	673	1097210	673	1330800	673	1439180	673	1439180	673	3232620		673	552200	673	1088810	673	967940	673	1043730	673	1139240	673	1390510	673	2043700		673	864500	673	492630	673	1010680	673	1547850	673	2646630	673
					674	490690	674	663690	674	804630	674	1172640	674	1076610	674	1310420	674	1414530	674	1414530	674	3174130		674	536880	674	1068900	674	944280	674	1019950	674	1101170	674	1368210	674	1994910		674	853260	674	480820	674	996600	674	1522290	674	2585390	674
					675	475680	675	653010	675	783290	675	1140750	675	1050520	675	1283540	675	1382590	675	1382590	675	3123810		675	525490	675	1041660	675	923290	675	994080	675	1081060	675	1333910	675	1949960		675	828190	675	470350	675	974740	675	1488620	675	2530690	675
					676	465000	676	638020	676	761530	676	1123310	676	1024570	676	1254110	676	1343060	676	1343060	676	3057110		676	512270	676	1014010	676	903740	676	974600	676	1055780	676	1302310	676	1909100		676	811910	676	459110	676	955000	676	1453280	676	2474300	676
					677	455560	677	613860	677	743550	677	1091390	677	991460	677	1221280	677	1309890	677	1309890	677	2996210		677	495840	677	990490	677	873420	677	951200	677	1022790	677	1269770	677	1868870		677	795640	677	455700	677	931290	677	1419570	677	2418710	677
					678	443160	678	599060	678	726610	678	1071950	678	972120	678	1191350	678	1283210	678	1283210	678	2924700		678	480570	678	962570	678	850150	678	924410	678	1006240	678	1240130	678	1830140		678	778170	678	442830	678	919250	678	1393100	678	2358210	678
					679	432300	679	585600	679	704320	679	1045530	679	952520	679	1166110	679	1249500	679	1249500	679	2875440		679	473370	679	936530	679	837620	679	899280	679	977330	679	1208890	679	1786640		679	759810	679	434430	679	899130	679	1363460	679	2311590	679
					680	421100	680	573150	680	688100	680	1016680	680	925100	680	1134480	680	1219700	680	1219700	680	2811260		680	458790	680	917500	680	812120	680	880660	680	950700	680	1173940	680	1737780		680	751220	680	427490	680	883200	680	1332340	680	2254760	680
					681	413060	681	564000	681	671950	681	998850	681	904320	681	1111230	681	1191950	681	1191950	681	2768460		681	445120	681	892370	681	790910	681	851810	681	930730	681	1149650	681	1704480		681	731570	681	418600	681	864400	681	1311860	681	2225490	681
					682	401700	682	545850	682	659150	682	968770	682	894740	682	1090320	682	1170720	682	1170720	682	2720120		682	440370	682	874030	682	778090	682	842010	682	905100	682	1125220	682	1674550		682	715460	682	411210	682	847480	682	1287230	682	2174090	682
					683	391360	683	535910	683	646800	683	959100	683	872810	683	1064730	683	1145560	683	1145560	683	2675490		683	430540	683	856830	683	757500	683	820890	683	891680	683	1108410	683	1644720		683	702350	683	405700	683	839340	683	1264760	683	2136810	683
					684	380060	684	524250	684	627770	684	943290	684	855780	684	1048260	684	1121240	684	1121240	684	2631470		684	419300	684	836590	684	746890	684	803030	684	872580	684	1072330	684	1610250		684	692970	684	399560	684	828880	684	1246760	684	2101300	684
					685	378590	685	513430	685	615270	685	925110	685	840610	685	1036620	685	1116430	685	1116430	685	2597790		685	412160	685	828830	685	728140	685	785830	685	855540	685	1061560	685	1585900		685	681480	685	394410	685	814920	685	1226030	685	2072240	685
					686	370790	686	501760	686	608350	686	911450	686	828440	686	1017840	686	1090100	686	1090100	686	2561160		686	404160	686	808870	686	717620	686	769420	686	844190	686	1045530	686	1574070		686	669460	686	386200	686	807840	686	1210950	686	2040020	686
[truncated: 21 more columns]

## Sheet: Fig 4
9/5/16 synth	10/31/16 analysis	SCF						H2O	t=65		t=120		t=145		EtOH	t=65		t=120		t=145		MeOH	t=65		t=120		t=145
tHEAT (min)	MeOH Wavelength max (nm)	EtOH Wavelength max (nm)	H2O Wavelength max (nm)						Wavelength (nm)	CPS	Wavelength (nm)	CPS	Wavelength (nm)	CPS		Wavelength (nm)	CPS	Wavelength (nm)	CPS	Wavelength (nm)	CPS		Wavelength (nm)	CPS	Wavelength (nm)	CPS	Wavelength (nm)	CPS
65	554	558	554						400	3765890	400	297410	400	34800		400	5930590	400	911360	400	103520		400	18449300	400	18622200	400	17012100
120	560	560	560						401	2954920	401	234210	401	28440		401	4729810	401	714050	401	84780		401	17197700	401	17418300	401	15386900
145	566	562	563						402	2084550	402	168410	402	20550		402	3395390	402	501810	402	60930		402	14957300	402	15283500	402	12827600
									403	1318860	403	107490	403	13680		403	2163750	403	317200	403	40130		403	11578400	403	11948800	403	9374570
									404	710060	404	58750	404	8650		404	1172280	404	169000	404	24370		404	7260240	404	7605590	404	5574580
									405	339970	405	30120	405	5040		405	554550	405	85580	405	14230		405	3725300	405	3929150	405	2762930
									406	134830	406	13600	406	2960		406	213530	406	37020	406	8830		406	1470210	406	1563760	406	1079760
									407	52800	407	7000	407	2130		407	72970	407	16860	407	6280		407	500970	407	529640	407	359250
									408	36510	408	5580	408	1840		408	44870	408	13440	408	5520		408	295480	408	305560	408	203870
									409	34440	409	5970	409	1690		409	40370	409	12510	409	5540		409	251260	409	258120	409	173070
									410	34140	410	5560	410	2000		410	37510	410	11610	410	5410		410	230140	410	233640	410	152090
									411	33280	411	5950	411	1770		411	36420	411	11900	411	5580		411	214790	411	213890	411	140680
									412	33680	412	5970	412	2040		412	34240	412	11120	412	5650		412	203540	412	200680	412	128530
									413	33840	413	6350	413	1980		413	34530	413	11200	413	5870		413	195720	413	189580	413	122430
									414	33020	414	6240	414	1860		414	33470	414	11840	414	5550		414	185700	414	181470	414	114080
									415	33180	415	6640	415	1840		415	33320	415	11910	415	5970		415	176830	415	173660	415	111070
									416	34270	416	6650	416	2160		416	33810	416	11780	416	5500		416	169850	416	166580	416	105270
									417	35620	417	6770	417	2080		417	32830	417	11680	417	5830		417	162740	417	156160	417	102040
									418	37880	418	7050	418	2220		418	33560	418	11680	418	6070		418	153700	418	149750	418	98120
									419	40140	419	7630	419	2130		419	32170	419	11280	419	5770		419	144260	419	144590	419	92130
									420	41230	420	7990	420	2480		420	34300	420	11560	420	5350		420	139250	420	138980	420	88870
									421	44200	421	8300	421	2560		421	34020	421	12380	421	5740		421	131770	421	133860	421	86170
									422	46930	422	8800	422	2520		422	35120	422	12530	422	5990		422	129440	422	128520	422	84520
									423	49990	423	9620	423	2870		423	35270	423	12860	423	5740		423	123810	423	126180	423	80630
									424	53570	424	10100	424	3030		424	37720	424	12570	424	5870		424	122460	424	124570	424	81540
									425	56220	425	11210	425	3110		425	37760	425	12840	425	5910		425	122850	425	125040	425	82210
									426	60940	426	11860	426	3340		426	38150	426	14060	426	6000		426	125410	426	127900	426	83020
									427	65970	427	12700	427	3650		427	39600	427	14070	427	6680		427	129620	427	129900	427	82570
									428	73000	428	13280	428	3180		428	42380	428	13750	428	6280		428	140240	428	134580	428	85700
									429	78250	429	14770	429	3540		429	43190	429	14730	429	6220		429	152630	429	146490	429	92030
									430	84270	430	15640	430	4330		430	44020	430	15070	430	6640		430	170160	430	158410	430	96770
									431	95080	431	16420	431	4130		431	45110	431	16160	431	6290		431	196310	431	176760	431	102840
									432	100240	432	17940	432	4720		432	47420	432	16080	432	6860		432	231620	432	203970	432	113580
									433	109740	433	19220	433	4930		433	49210	433	16370	433	6410		433	268980	433	229770	433	126280
									434	118020	434	21910	434	5410		434	51440	434	18060	434	7080		434	308500	434	258700	434	138810
									435	130630	435	23530	435	5570		435	52160	435	18270	435	7320		435	344810	435	284630	435	152620
									436	143550	436	24260	436	6600		436	57340	436	18990	436	7550		436	376940	436	311590	436	165830
									437	157330	437	26970	437	6150		437	59280	437	19650	437	7720		437	398970	437	328890	437	174600
									438	172350	438	28860	438	7380		438	59630	438	20830	438	7390		438	409150	438	334980	438	177470
									439	187350	439	32570	439	7950		439	63330	439	21550	439	7630		439	415700	439	337170	439	182390
									440	206680	440	34430	440	7880		440	65790	440	21850	440	7930		440	409870	440	334530	440	185570
									441	225730	441	37390	441	8670		441	68720	441	23570	441	8330		441	400090	441	337940	441	188240
									442	245930	442	39210	442	9390		442	70170	442	23820	442	8910		442	389040	442	334340	442	186920
									443	266850	443	43600	443	10000		443	72940	443	24920	443	8770		443	389470	443	330240	443	189850
									444	288110	444	45530	444	11340		444	74240	444	25930	444	9380		444	387230	444	332230	444	196030
									445	319520	445	50790	445	11740		445	75950	445	26610	445	9330		445	390330	445	338230	445	204270
									446	342140	446	53660	446	11930		446	79070	446	27960	446	9580		446	400990	446	353900	446	212890
									447	366990	447	58720	447	13010		447	79730	447	28090	447	9560		447	417600	447	364550	447	223470
									448	398790	448	62550	448	13790		448	83320	448	28830	448	10130		448	439320	448	385670	448	239560
									449	428160	449	69290	449	14970		449	85340	449	29060	449	9810		449	461910	449	404190	449	251800
									450	463660	450	74090	450	15680		450	86580	450	31490	450	9850		450	492360	450	434180	450	275950
									451	498180	451	78760	451	17290		451	91260	451	31610	451	10640		451	524470	451	460370	451	292340
									452	536450	452	82370	452	17470		452	92140	452	32730	452	11120		452	553940	452	496530	452	321650
									453	570500	453	91190	453	19410		453	97900	453	34560	453	10760		453	592650	453	529350	453	339470
									454	612900	454	96930	454	19700		454	100480	454	35960	454	11510		454	644180	454	573290	454	375360
									455	657660	455	103530	455	20740		455	104780	455	36410	455	11130		455	693030	455	613950	455	401580
									456	704710	456	111150	456	22610		456	107290	456	38360	456	11560		456	739740	456	658240	456	433320
									457	740770	457	117220	457	24050		457	111990	457	39440	457	11910		457	795270	457	711270	457	465640
									458	789720	458	127150	458	25350		458	116500	458	39580	458	12520		458	850530	458	767910	458	504440
									459	843520	459	133490	459	28030		459	117150	459	42490	459	13220		459	910020	459	827910	459	543730
									460	893400	460	141600	460	29810		460	125300	460	43210	460	13170		460	968360	460	889410	460	582710
									461	943390	461	149700	461	29930		461	127550	461	44920	461	13750		461	1029730	461	946390	461	622250
									462	995390	462	157630	462	32260		462	133550	462	44580	462	13430		462	1098320	462	1012440	462	680090
									463	1050430	463	166800	463	32310		463	138030	463	47900	463	14290		463	1161040	463	1077620	463	722160
									464	1114830	464	175130	464	34640		464	141940	464	50450	464	14760		464	1241820	464	1158800	464	767740
									465	1171340	465	186780	465	36240		465	149130	465	51360	465	14710		465	1308060	465	1219460	465	824730
									466	1233780	466	196170	466	38750		466	154280	466	53060	466	15410		466	1391880	466	1301760	466	883500
									467	1290620	467	207350	467	40350		467	162250	467	53630	467	16070		467	1458730	467	1378960	467	938040
									468	1361640	468	217970	468	43060		468	166910	468	56520	468	16540		468	1549530	468	1467260	468	1001180
									469	1425610	469	228660	469	45580		469	173070	469	58850	469	16710		469	1623720	469	1547760	469	1058140
									470	1480790	470	238180	470	47160		470	179760	470	60950	470	17570		470	1711990	470	1647320	470	1126790
									471	1555210	471	249040	471	49980		471	187220	471	63170	471	17460		471	1798460	471	1733040	471	1188250
									472	1634490	472	260790	472	50760		472	196550	472	65670	472	18050		472	1883280	472	1822140	472	1267290
									473	1696730	473	273420	473	53840		473	202910	473	66400	473	18610		473	1973500	473	1926530	473	1335680
									474	1769830	474	282670	474	54030		474	213580	474	71620	474	19780		474	2071840	474	2026310	474	1410990
									475	1850700	475	297740	475	58800		475	224290	475	75180	475	19660		475	2172280	475	2125490	475	1487320
									476	1925030	476	312640	476	60450		476	235480	476	77980	476	21410		476	2279080	476	2223780	476	1570490
									477	2021290	477	325430	477	63000		477	246190	477	81780	477	21950		477	2369270	477	2338500	477	1657580
									478	2095100	478	342210	478	65710		478	262490	478	85220	478	23170		478	2451470	478	2426910	478	1739250
									479	2178260	479	352340	479	70310		479	274970	479	90420	479	23970		479	2548760	479	2540970	479	1825060
									480	2275290	480	368670	480	72930		480	287710	480	94290	480	26440		480	2652090	480	2649240	480	1910460
									481	2362700	481	386890	481	75940		481	311680	481	100520	481	27400		481	2748900	481	2767960	481	1997830
									482	2457740	482	399520	482	76610		482	325970	482	107370	482	28210		482	2849030	482	2869090	482	2079560
									483	2556790	483	418790	483	83120		483	347980	483	115030	483	30970		483	2958410	483	2994450	483	2185000
									484	2666710	484	438170	484	85520		484	370290	484	121100	484	32620		484	3066540	484	3113400	484	2283850
									485	2759930	485	457800	485	90990		485	398670	485	129260	485	35110		485	3156280	485	3228420	485	2379030
									486	2878120	486	477190	486	93160		486	429820	486	139490	486	36400		486	3275100	486	3346820	486	2484560
									487	2984550	487	500870	487	99990		487	459200	487	149930	487	40160		487	3376120	487	3461600	487	2602530
									488	3113600	488	522020	488	105050		488	492190	488	163060	488	43970		488	3486390	488	3595630	488	2695910
									489	3218800	489	546420	489	108200		489	526600	489	171160	489	46030		489	3584640	489	3691360	489	2803820
									490	3363880	490	573760	490	115910		490	572220	490	185820	490	51040		490	3693150	490	3833820	490	2925920
									491	3505620	491	607260	491	121600		491	617230	491	201630	491	57400		491	3804960	491	3961460	491	3053150
									492	3634080	492	629000	492	125520		492	668720	492	224500	492	62650		492	3909430	492	4089180	492	3146460
									493	3780980	493	659010	493	136170		493	728910	493	244300	493	68740		493	4022870	493	4211320	493	3273630
									494	3928190	494	693590	494	143070		494	797510	494	268810	494	77740		494	4121100	494	4337230	494	3391790
									495	4091540	495	740430	495	153170		495	865970	495	295080	495	85080		495	4233550	495	4456130	495	3520980
									496	4241950	496	771980	496	161360		496	955550	496	327780	496	97390		496	4347010	496	4599150	496	3640000
									497	4403320	497	814680	497	173050		497	1031170	497	360770	497	108280		497	4454610	497	4715310	497	3778210
									498	4567390	498	853260	498	183970		498	1128120	498	401050	498	123080		498	4555600	498	4849210	498	3903900
									499	4754090	499	902680	499	193650		499	1212840	499	438190	499	137010		499	4660680	499	4963300	499	4035030
									500	4922010	500	946800	500	208030		500	1317620	500	482390	500	151260		500	4768340	500	5096430	500	4165250
									501	5112450	501	1006290	501	223000		501	1440970	501	544310	501	176500		501	4871120	501	5222370	501	4293470
									502	5280280	502	1055690	502	242260		502	1564980	502	593810	502	199130		502	4983180	502	5348460	502	4434080
									503	5487610	503	1115020	503	255970		503	1708070	503	665270	503	223590		503	5075660	503	5469820	503	4576340
									504	5665500	504	1173960	504	274010		504	1852320	504	736550	504	257380		504	5166220	504	5586700	504	4692600
									505	5861770	505	1242160	505	292250		505	2028400	505	823890	505	292770		505	5261600	505	5712180	505	4852020
									506	6064220	506	1309820	506	313230		506	2206980	506	923080	506	337800		506	5363250	506	5849880	506	4995010
									507	6259030	507	1377250	507	335860		507	2395760	507	1020010	507	381990		507	5458000	507	5960190	507	5118900
									508	6457240	508	1452900	508	362770		508	2586210	508	1142430	508	433900		508	5537360	508	6080850	508	5244820
									509	6665030	509	1538170	509	388520		509	2821270	509	1271110	509	501900		509	5656310	509	6201520	509	5385950
									510	6854680	510	1618990	510	417490		510	3045670	510	1410960	510	575050		510	5737750	510	6313370	510	5517700
									511	7044410	511	1699310	511	446940		511	3292310	511	1561230	511	650940		511	5813200	511	6414770	511	5657950
									512	7259650	512	1795450	512	479090		512	3551750	512	1728890	512	741490		512	5902940	512	6533750	512	5780320
									513	7451940	513	1898390	513	518260		513	3816380	513	1885580	513	832720		513	5982280	513	6648260	513	5903990
									514	7642240	514	1977380	514	556400		514	4065140	514	2065400	514	942330		514	6046690	514	6746500	514	6036880
									515	7829590	515	2089000	515	594440		515	4298900	515	2242250	515	1044680		515	6131340	515	6845730	515	6152490
									516	8023970	516	2181620	516	634560		516	4562160	516	2446570	516	1172050		516	6202170	516	6943190	516	6289300
									517	8222390	517	2295810	517	677950		517	4812680	517	2638490	517	1293410		517	6273500	517	7054660	517	6405800
									518	8368970	518	2400580	518	722570		518	5040310	518	2822590	518	1427430		518	6336290	518	7117500	518	6520920
									519	8533920	519	2491410	519	770040		519	5295640	519	3031860	519	1563070		519	6379960	519	7231060	519	6640210
									520	8705560	520	2621640	520	825660		520	5546930	520	3257220	520	1719920		520	6436250	520	7300180	520	6751620
									521	8875340	521	2728210	521	875190		521	5782250	521	3463230	521	1877310		521	6494070	521	7400280	521	6855770
									522	9030230	522	2831850	522	931310		522	6044200	522	3708630	522	2053350		522	6560380	522	7469950	522	6977400
									523	9197120	523	2959120	523	988030		523	6330400	523	3956710	523	2245420		523	6610540	523	7546840	523	7084890
									524	9358780	524	3074670	524	1054230		524	6608190	524	4228460	524	2457220		524	6666940	524	7643260	524	7199110
									525	9499800	525	3191230	525	1114020		525	6852500	525	4480700	525	2657910		525	6734860	525	7711810	525	7298670
									526	9634070	526	3309130	526	1179500		526	7152720	526	4768270	526	2887300		526	6770850	526	7788670	526	7397790
									527	9777730	527	3431130	527	1249350		527	7430300	527	5044380	527	3137490		527	6831630	527	7877940	527	7521610
									528	9901250	528	3553590	528	1322590		528	7675130	528	5320830	528	3370100		528	6867450	528	7941260	528	7612590
									529	10045300	529	3671350	529	1397110		529	7926250	529	5583890	529	3607110		529	6922080	529	8019360	529	7703210
									530	10154100	530	3799830	530	1465270		530	8155720	530	5848730	530	3830380		530	6969440	530	8099850	530	7804570
									531	10275200	531	3907320	531	1536960		531	8353500	531	6093780	531	4051880		531	6999130	531	8155460	531	7899430
									532	10384200	532	4019580	532	1606880		532	8560600	532	6344000	532	4286910		532	7051890	532	8219810	532	7987900
									533	10486300	533	4145990	533	1685540		533	8771710	533	6586080	533	4538820		533	7102710	533	8282390	533	8071410
									534	10588900	534	4260260	534	1762510		534	8977010	534	6846690	534	4787320		534	7128080	534	8357280	534	8168820
									535	10681000	535	4365420	535	1837980		535	9186530	535	7094360	535	5038590		535	7172770	535	8398450	535	8232620
									536	10766800	536	4472810	536	1913810		536	9390150	536	7348210	536	5278050		536	7197040	536	8477070	536	8323810
									537	10855800	537	4572580	537	1989390		537	9551500	537	7572080	537	5527380		537	7242970	537	8517710	537	8381530
									538	10914100	538	4658460	538	2063950		538	9721810	538	7796480	538	5747810		538	7271970	538	8577310	538	8459830
									539	11003400	539	4756450	539	2139070		539	9866500	539	8013150	539	5968580		539	7285120	539	8614170	539	8520550
									540	11059200	540	4856280	540	2209040		540	9991060	540	8198820	540	6147710		540	7320070	540	8680950	540	8594150
									541	11118600	541	4947880	541	2273900		541	10112800	541	8356840	541	6339590		541	7352870	541	8744870	541	8655920
									542	11167700	542	5034990	542	2338910		542	10197900	542	8514710	542	6509540		542	7373550	542	8773140	542	8709530
									543	11227700	543	5117780	543	2409060		543	10296300	543	8645650	543	6695730		543	7421550	543	8817480	543	8772260
									544	11250700	544	5190830	544	2465480		544	10403600	544	8792060	544	6835180		544	7420770	544	8855770	544	8832280
									545	11294100	545	5245200	545	2544620		545	10484700	545	8940250	545	6998480		545	7447650	545	8894190	545	8882720
									546	11336900	546	5306060	546	2595280		546	10556600	546	9052500	546	7164520		546	7451480	546	8925430	546	8932970
									547	11360500	547	5383350	547	2643860		547	10649400	547	9184080	547	7301910		547	7475830	547	8959140	547	8975720
									548	11379600	548	5431820	548	2703340		548	10701000	548	9286870	548	7408110		548	7491450	548	8981000	548	9028080
									549	11405200	549	5475700	549	2757550		549	10750400	549	9380820	549	7535960		549	7504530	549	9030240	549	9057870
									550	11421600	550	5523820	550	2797510		550	10795700	550	9471330	550	7640950		550	7519070	550	9030210	550	9091650
									551	11440700	551	5567050	551	2826450		551	10836500	551	9539610	551	7743650		551	7514590	551	9043960	551	9136140
									552	11443200	552	5584290	552	2882010		552	10878400	552	9595670	552	7816000		552	7525170	552	9078360	552	9157400
									553	11444400	553	5622530	553	2913710		553	10896400	553	9666910	553	7898420		553	7539810	553	9096150	553	9180780
									554	11450700	554	5647070	554	2955440		554	10925400	554	9704580	554	7959760		554	7535490	554	9111020	554	9201100
									555	11438800	555	5675430	555	2971030		555	10948000	555	9745320	555	8020190		555	7551650	555	9116650	555	9231360
									556	11432000	556	5694500	556	2994320		556	10954200	556	9789390	556	8069110		556	7551060	556	9131960	556	9247170
									557	11418600	557	5704400	557	3015970		557	10952000	557	9823220	557	8101500		557	7534420	557	9142830	557	9268820
									558	11409500	558	5708320	558	3038180		558	10954900	558	9845030	558	8129780		558	7549400	558	9143040	558	9273620
									559	11396400	559	5709770	559	3047250		559	10953600	559	9862800	559	8148560		559	7523360	559	9144340	559	9298190
									560	11368000	560	5732660	560	3061740		560	10948600	560	9875230	560	8186430		560	7543970	560	9127540	560	9315900
									561	11359900	561	5723390	561	3079630		561	10939300	561	9865410	561	8192920		561	7519390	561	9134710	561	9316610
									562	11344300	562	5717980	562	3089460		562	10917400	562	9858870	562	8205460		562	7518840	562	9138750	562	9318950
									563	11310800	563	5725750	563	3094850		563	10910600	563	9864950	563	8191430		563	7505470	563	9149260	563	9329240
									564	11289800	564	5707190	564	3094130		564	10891500	564	9848120	564	8195840		564	7483610	564	9137250	564	9330150
									565	11274300	565	5687280	565	3087030		565	10852100	565	9817940	565	8180270		565	7480180	565	9119800	565	9332710
									566	11227700	566	5682530	566	3081690		566	10831300	566	9813640	566	8163700		566	7489490	566	9106070	566	9326480
									567	11211800	567	5654510	567	3079310		567	10808700	567	9807340	567	8157530		567	7457610	567	9115090	567	9334160
									568	11176800	568	5634880	568	3069970		568	10766200	568	9761020	568	8135600		568	7448090	568	9096270	568	9315560
									569	11126400	569	5622640	569	3072750		569	10732000	569	9747530	569	8099650		569	7435470	569	9078520	569	9312260
									570	11103800	570	5594790	570	3063810		570	10711500	570	9709860	570	8068940		570	7417060	570	9055750	570	9317160
									571	11085000	571	5578090	571	3041120		571	10646500	571	9687550	571	8048200		571	7390800	571	9040720	571	9300150
									572	11033900	572	5559950	572	3039490		572	10625500	572	9646750	572	7997780		572	7361650	572	9027270	572	9289890
									573	11001200	573	5538480	573	3030990		573	10568200	573	9629440	573	7980980		573	7351170	573	9002820	573	9278220
									574	10946600	574	5501030	574	3020350		574	10534200	574	9571010	574	7936120		574	7324990	574	8979550	574	9253830
									575	10899800	575	5471640	575	2991090		575	10494100	575	9524970	575	7911430		575	7311960	575	8962140	575	9245310
									576	10867200	576	5451330	576	2981810		576	10439100	576	9479160	576	7850020		576	7286590	576	8940400	576	9214860
									577	10800300	577	5414700	577	2955480		577	10402300	577	9445370	577	7807330		577	7253770	577	8911080	577	9201100
									578	10773200	578	5383580	578	2938090		578	10350200	578	9391550	578	7797020		578	7226810	578	8896630	578	9180740
									579	10705300	579	5351200	579	2920080		579	10296900	579	9353610	579	7729420		579	7196410	579	8863580	579	9168470
									580	10672600	580	5312600	580	2909070		580	10252700	580	9295470	580	7694290		580	7172900	580	8837140	580	9140560
									581	10618900	581	5287380	581	2872320		581	10198100	581	9251430	581	7638820		581	7136560	581	8806220	581	9120460
									582	10567800	582	5247070	582	2855140		582	10136500	582	9209320	582	7569730		582	7111500	582	8764750	582	9100830
									583	10523300	583	5212870	583	2834970		583	10094700	583	9149270	583	7532000		583	7080560	583	8747320	583	9055310
									584	10464700	584	5159270	584	2813170		584	10030300	584	9093710	584	7482320		584	7037770	584	8681870	584	9054480
									585	10406200	585	5132650	585	2786460		585	9976800	585	9036970	585	7427530		585	6996160	585	8652320	585	9012140
									586	10351700	586	5093730	586	2773110		586	9928020	586	8976540	586	7374620		586	6965800	586	8628470	586	9003040
									587	10304200	587	5057780	587	2741190		587	9870020	587	8926870	587	7334780		587	6932800	587	8600930	587	8948790
									588	10237000	588	5027340	588	2720760		588	9802010	588	8871160	588	7263290		588	6901410	588	8547550	588	8911720
									589	10176400	589	4967710	589	2687530		589	9747590	589	8795230	589	7218750		589	6860920	589	8505630	589	8864480
									590	10116300	590	4933420	590	2664170		590	9675900	590	8744840	590	7166390		590	6822220	590	8483410	590	8845970
									591	10055400	591	4911730	591	2647400		591	9624350	591	8686140	591	7114290		591	6781310	591	8430800	591	8804690
									592	9987790	592	4850030	592	2623450		592	9549610	592	8601310	592	7023740		592	6731700	592	8376310	592	8771430
									593	9927190	593	4810010	593	2591920		593	9477690	593	8546770	593	6972010		593	6694910	593	8342400	593	8731390
									594	9871620	594	4771010	594	2570750		594	9404110	594	8488290	594	6917710		594	6646280	594	8290590	594	8691990
									595	9814280	595	4720850	595	2533260		595	9343400	595	8425670	595	6850580		595	6591220	595	8250890	595	8642800
									596	9718330	596	4683490	596	2504430		596	9252030	596	8355280	596	6786080		596	6554280	596	8198030	596	8591170
									597	9655260	597	4626300	597	2490070		597	9205240	597	8271950	597	6719690		597	6497980	597	8151350	597	8557320
									598	9592960	598	4586070	598	2459530		598	9131490	598	8208530	598	6661690		598	6456990	598	8103250	598	8506950
									599	9529450	599	4546880	599	2430270		599	9045500	599	8140040	599	6593310		599	6406630	599	8067980	599	8466930
									600	9454620	600	4504820	600	2399860		600	8967960	600	8068830	600	6533840		600	6370210	600	8011380	600	8399030
									601	9382320	601	4451740	601	2369940		601	8908760	601	8007560	601	6468960		601	6307000	601	7959970	601	8381330
									602	9304210	602	4406300	602	2349020		602	8836270	602	7926400	602	6403030		602	6255780	602	7905910	602	8316490
									603	9231530	603	4361780	603	2315710		603	8738120	603	7845790	603	6320560		603	6205000	603	7836380	603	8257310
									604	9163890	604	4313870	604	2292690		604	8667440	604	7761560	604	6258960		604	6169850	604	7786340	604	8208460
									605	9090430	605	4265260	605	2267530		605	8594530	605	7703390	605	6185560		605	6104030	605	7744770	605	8167590
									606	9006870	606	4220830	606	2236550		606	8507970	606	7632330	606	6132650		606	6050830	606	7682950	606	8107460
									607	8928870	607	4172150	607	2194900		607	8431060	607	7550620	607	6060110		607	5994850	607	7625040	607	8050860
									608	8865300	608	4132570	608	2180020		608	8369480	608	7476150	608	5995070		608	5928320	608	7573960	608	8005530
									609	8790140	609	4089790	609	2150050		609	8270630	609	7397300	609	5929130		609	5877180	609	7509530	609	7940420
									610	8709450	610	4033760	610	2128460		610	8204670	610	7324490	610	5863110		610	5830570	610	7450250	610	7883870
									611	8635320	611	3986670	611	2090560		611	8126780	611	7253780	611	5800110		611	5786360	611	7396250	611	7830200
									612	8570810	612	3945040	612	2079430		612	8047840	612	7177110	612	5744720		612	5713350	612	7340250	612	7767420
									613	8475480	613	3900790	613	2041570		613	7954450	613	7099570	613	5659900		613	5663080	613	7283170	613	7722390
									614	8395090	614	3853220	614	2015300		614	7883730	614	7031920	614	5602940		614	5608010	614	7233560	614	7663090
									615	8330500	615	3803070	615	1997810		615	7807690	615	6946550	615	5532850		615	5545200	615	7158830	615	7602320
									616	8247260	616	3768950	616	1972180		616	7714030	616	6872570	616	5459160		616	5516600	616	7104380	616	7540100
									617	8177270	617	3716770	617	1928720		617	7622280	617	6780030	617	5387750		617	5439370	617	7037350	617	7489230
									618	8090100	618	3679010	618	1912350		618	7529870	618	6712380	618	5320510		618	5366330	618	6984260	618	7433730
									619	8021700	619	3633510	619	1887280		619	7445310	619	6633400	619	5259100		619	5328850	619	6930060	619	7357120
									620	7955440	620	3584540	620	1861160		620	7374160	620	6555610	620	5181300		620	5271550	620	6870520	620	7309680
									621	7874200	621	3546640	621	1839520		621	7272830	621	6473920	621	5104080		621	5214260	621	6788680	621	7249500
									622	7802970	622	3492540	622	1803820		622	7188170	622	6396470	622	5047200		622	5164650	622	6741460	622	7183840
									623	7705790	623	3447910	623	1783750		623	7108730	623	6321390	623	4983830		623	5110240	623	6678350	623	7140250
									624	7643160	624	3408620	624	1761510		624	7043970	624	6243060	624	4918350		624	5057690	624	6612870	624	7061350
									625	7567790	625	3364170	625	1734040		625	6949960	625	6165980	625	4862770		625	4989900	625	6555370	625	7020740
									626	7491640	626	3328110	626	1706560		626	6863860	626	6093970	626	4798420		626	4957060	626	6499010	626	6933730
									627	7405180	627	3279890	627	1682710		627	6801260	627	6009910	627	4727450		627	4904690	627	6425880	627	6895760
									628	7334780	628	3253890	628	1664920		628	6706350	628	5922460	628	4662080		628	4835140	628	6374310	628	6824560
									629	7261250	629	3213230	629	1640970		629	6635570	629	5878940	629	4602960		629	4782830	629	6308220	629	6768540
									630	7192780	630	3158340	630	1613900		630	6547000	630	5800410	630	4539290		630	4732610	630	6248590	630	6709560
									631	7108950	631	3127310	631	1597200		631	6475350	631	5727330	631	4473520		631	4688500	631	6182530	631	6647550
									632	7029630	632	3086350	632	1570020		632	6410990	632	5653840	632	4436570		632	4641530	632	6133890	632	6579430
									633	6951020	633	3042520	633	1546570		633	6325780	633	5581280	633	4363850		633	4586680	633	6065860	633	6523290
									634	6887310	634	3002260	634	1530980		634	6262710	634	5514590	634	4311030		634	4533850	634	6003480	634	6462110
									635	6809270	635	2952760	635	1507330		635	6178170	635	5445380	635	4248050		635	4476910	635	5962970	635	6402120
									636	6736300	636	2915490	636	1487350		636	6081540	636	5372420	636	4187620		636	4432580	636	5890140	636	6342510
									637	6666200	637	2887640	637	1463870		637	6021870	637	5301860	637	4139680		637	4385620	637	5827640	637	6281950
									638	6575540	638	2849140	638	1442910		638	5934400	638	5239770	638	4075000		638	4316630	638	5770390	638	6198920
									639	6509710	639	2806620	639	1416410		639	5859600	639	5165670	639	4023960		639	4280650	639	5693700	639	6156330
									640	6425900	640	2758900	640	1396830		640	5779710	640	5089310	640	3958390		640	4222060	640	5641820	640	6076340
									641	6358500	641	2732750	641	1376770		641	5693780	641	5021160	641	3887630		641	4169130	641	5571720	641	6017210
									642	6274510	642	2683940	642	1361720		642	5618770	642	4950730	642	3831360		642	4115710	642	5510560	642	5947340
									643	6200520	643	2647150	643	1336300		643	5542560	643	4868100	643	3788070		643	4069320	643	5452080	643	5894280
									644	6122690	644	2601140	644	1309130		644	5468840	644	4813030	644	3720950		644	4019860	644	5394710	644	5835120
									645	6022360	645	2562750	645	1285040		645	5369630	645	4744420	645	3663890		645	3957380	645	5323640	645	5761980
									646	5968720	646	2539370	646	1268390		646	5294630	646	4649290	646	3612420		646	3901120	646	5251390	646	5696350
									647	5876200	647	2491250	647	1252270		647	5227070	647	4596510	647	3539360		647	3851700	647	5185660	647	5614240
									648	5818610	648	2452500	648	1224070		648	5143570	648	4518000	648	3497400		648	3787640	648	5115620	648	5555090
									649	5717630	649	2404530	649	1207700		649	5075430	649	4448540	649	3438340		649	3731830	649	5048220	649	5469720
									650	5644570	650	2375890	650	1190590		650	4987650	650	4383230	650	3375810		650	3686100	650	4978610	650	5408380
									651	5567370	651	2336760	651	1164800		651	4918640	651	4312810	651	3319440		651	3637550	651	4929520	651	5348260
									652	5478510	652	2294540	652	1141040		652	4833290	652	4237710	652	3257280		652	3571940	652	4852920	652	5274680
									653	5398990	653	2253990	653	1120560		653	4750630	653	4156300	653	3213470		653	3520370	653	4782780	653	5193960
									654	5309750	654	2212350	654	1104870		654	4665080	654	4083250	654	3150080		654	3456740	654	4709820	654	5123930
									655	5231450	655	2175510	655	1078990		655	4582110	655	4033860	655	3099670		655	3403790	655	4650980	655	5053280
									656	5145490	656	2134730	656	1057010		656	4520650	656	3962740	656	3043820		656	3353180	656	4571090	656	4973900
									657	5082950	657	2108120	657	1037110		657	4440600	657	3897300	657	2997830		657	3298170	657	4499850	657	4911290
									658	4993670	658	2058270	658	1025870		658	4363700	658	3840850	658	2936720		658	3238630	658	4438510	658	4841010
									659	4908920	659	2020650	659	1005540		659	4292540	659	3756600	659	2886730		659	3193740	659	4370420	659	4760290
									660	4830250	660	1984950	660	978540		660	4212980	660	3688050	660	2830790		660	3136850	660	4296790	660	4697980
									661	4747290	661	1952730	661	963990		661	4146290	661	3622030	661	2766360		661	3084860	661	4229270	661	4641230
									662	4678830	662	1909050	662	943810		662	4061390	662	3561620	662	2726180		662	3020530	662	4159700	662	4555140
									663	4592900	663	1877150	663	921500		663	3998350	663	3500100	663	2671230		663	2970360	663	4097710	663	4482150
									664	4503010	664	1842970	664	906780		664	3923050	664	3432350	664	2618850		664	2913410	664	4021680	664	4403130
									665	4430350	665	1806290	665	892680		665	3845130	665	3373170	665	2573040		665	2861230	665	3950660	665	4336970
									666	4352590	666	1773370	666	871310		666	3768340	666	3301430	666	2518580		666	2819430	666	3883100	666	4268120
									667	4275290	667	1744040	667	845970		667	3698640	667	3237790	667	2459060		667	2752300	667	3814860	667	4192390
									668	4192080	668	1703110	668	835460		668	3618160	668	3181320	668	2417930		668	2699580	668	3762560	668	4132020
									669	4119250	669	1670160	669	819760		669	3540180	669	3108530	669	2358600		669	2649230	669	3687020	669	4053850
									670	4043770	670	1637180	670	801930		670	3483550	670	3042830	670	2312540		670	2595640	670	3621880	670	3983870
									671	3978500	671	1598330	671	783190		671	3407510	671	2980540	671	2266720		671	2552920	671	3555580	671	3912020
									672	3897390	672	1560850	672	762920		672	3332320	672	2919880	672	2211170		672	2503500	672	3493930	672	3842870
									673	3811410	673	1534940	673	746120		673	3276510	673	2848440	673	2165010		673	2455640	673	3432440	673	3770140
									674	3746280	674	1501600	674	733660		674	3191640	674	2800560	674	2125800		674	2402790	674	3355890	674	3707730
									675	3665270	675	1469620	675	719530		675	3126910	675	2741320	675	2079610		675	2348720	675	3290930	675	3642870
									676	3594760	676	1443020	676	699020		676	3057660	676	2668170	676	2029050		676	2303960	676	3233870	676	3570980
									677	3516410	677	1404630	677	677230		677	2987490	677	2605880	677	1981310		677	2249620	677	3164810	677	3489140
									678	3434740	678	1369950	678	662640		678	2911090	678	2549070	678	1933940		678	2192350	678	3094320	678	3426130
									679	3365310	679	1338410	679	652520		679	2846880	679	2497500	679	1884210		679	2159200	679	3037960	679	3351840
									680	3307860	680	1313040	680	632300		680	2782820	680	2440270	680	1845370		680	2102300	680	2965540	680	3297900
									681	3230370	681	1281320	681	624910		681	2724360	681	2383490	681	1807030		681	2061620	681	2919020	681	3232980
									682	3173230	682	1258010	682	611780		682	2669010	682	2330670	682	1764040		682	2033490	682	2876420	682	3168770
									683	3124020	683	1232250	683	595820		683	2624080	683	2303710	683	1732270		683	1994890	683	2826410	683	3127480
									684	3057250	684	1203210	684	585120		684	2572470	684	2254070	684	1696160		684	1963900	684	2779720	684	3078410
									685	3033310	685	1184960	685	573300		685	2531560	685	2211310	685	1672380		685	1936000	685	2748650	685	3034810
									686	2972140	686	1174620	686	564180		686	2489810	686	2173250	686	1645720		686	1918390	686	2705680	686	3000360

## Sheet: Fig 5
										40 deg C	t=0		t=18		t=31		t=73		t=94		t=138		t=157		t=166		60 deg C	t=31		t=48		t=76		t=88		t=100		t=140		t=160		80 deg C	t=33		t=41		t=49		t=57
											Wavelength (nm)	CPS	Wavelength (nm)	CPS	Wavelength (nm)	CPS	Wavelength (nm)	CPS	Wavelength (nm)	CPS	Wavelength (nm)	CPS	Wavelength (nm)	CPS	Wavelength (nm)	CPS		Wavelength (nm)	CPS	Wavelength (nm)	CPS	Wavelength (nm)	CPS	Wavelength (nm)	CPS	Wavelength (nm)	CPS	Wavelength (nm)	CPS	Wavelength (nm)	CPS		Wavelength (nm)	CPS	Wavelength (nm)	CPS	Wavelength (nm)	CPS	Wavelength (nm)
											400	3317380	400	3949570	400	4111530	400	4250210	400	4427690	400	4670430	400	5734960	400	4223080		400	4235670	400	4155520	400	6841810	400	3078330	400	3627320	400	4310760	400	4915990		400	3236970	400	4089210	400	4351360	400
40C			60C			80C					401	2483160	401	2938100	401	3030810	401	3169580	401	3355110	401	3473600	401	4301880	401	3134180		401	3129640	401	3076410	401	5845560	401	2262390	401	2665790	401	3276280	401	3638880		401	2381380	401	3006350	401	3222910	401
Heat (min)	Wavelength (nm)		Heat (min)	Wavelength (nm)		Heat (min)	Wavelength (nm)				402	1663100	402	1955050	402	2044440	402	2145950	402	2349110	402	2377980	402	2916760	402	2112070		402	2102190	402	2088080	402	4379880	402	1502330	402	1822650	402	2254790	402	2433980		402	1575230	402	2007140	402	2189900	402
0	604		0	604		0	604				403	1005050	403	1190210	403	1228970	403	1307040	403	1414670	403	1433240	403	1763810	403	1276970		403	1262950	403	1270470	403	3002300	403	901410	403	1094140	403	1386770	403	1431120		403	953650	403	1217420	403	1334190	403
18	616.6		31	630		33	635.42				404	524700	404	617200	404	651940	404	685450	404	755970	404	737180	404	909310	404	660610		404	651550	404	659420	404	1741430	404	465730	404	559570	404	730620	404	735400		404	489940	404	635710	404	692710	404
31	621.42		48	635		41	638.038				405	253780	405	297860	405	316450	405	329750	405	353020	405	352140	405	426410	405	315880		405	308890	405	315770	405	864620	405	222760	405	261760	405	335030	405	330760		405	236060	405	295810	405	333870	405
73	619.06		76	635.55		49	639.67				406	120880	406	135960	406	143640	406	145780	406	151410	406	152680	406	181670	406	141540		406	133670	406	133060	406	325010	406	102170	406	114140	406	133590	406	133780		406	106820	406	129170	406	142980	406
94	623.97		88	637.38		57	641.37				407	64650	407	73390	407	73630	407	75030	407	77870	407	77750	407	88670	407	76530		407	66070	407	62850	407	101960	407	55840	407	56950	407	64670	407	68620		407	56640	407	65100	407	68740	407
138	627.96		100	639.2		75	644.7				408	57740	408	63170	408	63390	408	62270	408	63370	408	63190	408	70600	408	62110		408	52170	408	49320	408	65090	408	44360	408	46580	408	52520	408	55590		408	45610	408	51980	408	50390	408
157	627.17		140	639.2		87	645.1				409	57740	409	64590	409	64100	409	63010	409	67050	409	66050	409	68340	409	64790		409	50050	409	48580	409	58140	409	43330	409	44710	409	48570	409	52230		409	44540	409	51340	409	50270	409
166	629.4		160	638.82		105	645.75				410	63450	410	69970	410	67990	410	66060	410	69060	410	68720	410	72330	410	68080		410	52110	410	48870	410	58470	410	45570	410	45970	410	49640	410	50470		410	44370	410	50790	410	51960	410
						141	643.01				411	68340	411	73750	411	74140	411	70730	411	75880	411	75170	411	75720	411	73710		411	53640	411	50660	411	59800	411	48080	411	47280	411	48170	411	54610		411	48190	411	52800	411	53650	411
											412	76360	412	84540	412	82580	412	78270	412	83830	412	79950	412	82270	412	82110		412	57340	412	53860	412	60730	412	50430	412	51900	412	52730	412	56790		412	50190	412	55090	412	57300	412
											413	83730	413	93810	413	88270	413	88350	413	91380	413	89530	413	90480	413	90230		413	61960	413	57110	413	66200	413	55080	413	55470	413	57830	413	61680		413	55580	413	61210	413	60810	413
											414	93470	414	101870	414	100450	414	98220	414	103550	414	101080	414	98650	414	104110		414	69110	414	63180	414	70890	414	60620	414	60740	414	64180	414	66450		414	60560	414	66280	414	65700	414
											415	107100	415	115010	415	114560	415	109680	415	114640	415	111890	415	110730	415	115080		415	73980	415	70600	415	75900	415	67960	415	69150	415	68620	415	73090		415	65500	415	71630	415	72960	415
											416	116550	416	126410	416	126730	416	119770	416	125980	416	123720	416	119400	416	125480		416	82090	416	75510	416	81940	416	74150	416	74610	416	76340	416	78130		416	71970	416	80450	416	79280	416
											417	131760	417	138690	417	135790	417	135090	417	139670	417	136880	417	132230	417	137910		417	89630	417	84480	417	88710	417	80210	417	80590	417	84140	417	85130		417	79160	417	85120	417	84470	417
											418	139160	418	153400	418	146620	418	143930	418	150780	418	148640	418	142800	418	151180		418	96630	418	87660	418	94110	418	88940	418	86130	418	89520	418	93740		418	87640	418	93290	418	94070	418
											419	150710	419	163790	419	160690	419	154600	419	164610	419	159240	419	153710	419	162160		419	101830	419	95020	419	100010	419	92760	419	93090	419	95420	419	98190		419	92270	419	97460	419	98620	419
											420	161540	420	174970	420	169500	420	165160	420	172370	420	171710	420	161010	420	173880		420	109020	420	99290	420	105910	420	99260	420	97470	420	101480	420	104720		420	99350	420	104650	420	105140	420
											421	170730	421	185960	421	179460	421	172590	421	186030	421	180160	421	173280	421	185530		421	115300	421	103900	421	111720	421	105640	421	101620	421	104570	421	110580		421	102600	421	109530	421	110200	421
											422	176590	422	197120	422	189400	422	181380	422	192210	422	188440	422	178790	422	190910		422	119160	422	110290	422	114890	422	109310	422	109700	422	109630	422	113930		422	106520	422	112720	422	116360	422
											423	186200	423	199530	423	194190	423	190730	423	202110	423	195680	423	187450	423	199830		423	122570	423	115250	423	118810	423	113070	423	110780	423	115250	423	118300		423	111790	423	120550	423	121270	423
											424	189790	424	208690	424	201130	424	194160	424	206130	424	202180	424	191520	424	204240		424	126500	424	116920	424	123190	424	115590	424	115650	424	116400	424	121430		424	113480	424	120920	424	123820	424
											425	194860	425	213250	425	206990	425	198070	425	212390	425	204460	425	197640	425	211140		425	129530	425	120600	425	122450	425	118590	425	117490	425	121220	425	124640		425	115190	425	122840	425	125620	425
											426	197870	426	218440	426	214690	426	204620	426	216110	426	210880	426	200520	426	213290		426	131920	426	121500	426	125430	426	118030	426	117110	426	121670	426	127080		426	117330	426	125660	426	128430	426
											427	203930	427	221750	427	214770	427	205740	427	217340	427	215820	427	205390	427	218580		427	130910	427	125420	427	125880	427	122840	427	120520	427	123300	427	128820		427	120710	427	127770	427	131690	427
											428	207160	428	222140	428	219230	428	211100	428	223270	428	216640	428	206270	428	218450		428	134330	428	123700	428	130370	428	123020	428	122220	428	125570	428	130610		428	121030	428	128520	428	131420	428
											429	208060	429	228090	429	222360	429	213580	429	226520	429	217240	429	207960	429	223390		429	134160	429	126060	429	128130	429	123840	429	123270	429	127060	429	130300		429	124640	429	130670	429	132820	429
											430	210420	430	224910	430	220530	430	214860	430	228270	430	222150	430	210490	430	225200		430	137720	430	125050	430	130520	430	128370	430	126780	430	127730	430	131660		430	123480	430	130990	430	135700	430
											431	210510	431	231950	431	226560	431	221160	431	228770	431	224760	431	213220	431	223800		431	142100	431	130020	431	131410	431	127780	431	128670	431	130680	431	134060		431	128420	431	133390	431	135390	431
											432	217920	432	237650	432	230710	432	225170	432	236070	432	228230	432	217290	432	236220		432	145450	432	135560	432	136680	432	132250	432	132510	432	135940	432	140180		432	132490	432	138620	432	141620	432
											433	225090	433	245460	433	237030	433	234980	433	242260	433	238520	433	230310	433	242900		433	152340	433	141510	433	145780	433	145070	433	139690	433	146170	433	146760		433	137750	433	149890	433	149990	433
											434	238000	434	260390	434	255520	434	243880	434	258250	434	253870	434	241650	434	256030		434	166980	434	158150	434	159710	434	156640	434	154630	434	155110	434	163820		434	153700	434	161510	434	164880	434
											435	258120	435	280200	435	274240	435	265910	435	278600	435	274020	435	260510	435	276820		435	187910	435	177460	435	182410	435	177010	435	172490	435	179460	435	186160		435	174780	435	182880	435	184220	435
											436	282430	436	309800	436	302970	436	293710	436	303720	436	302610	436	288080	436	308890		436	216720	436	211200	436	212540	436	205780	436	205210	436	208030	436	210460		436	202520	436	213220	436	213330	436
											437	320390	437	348260	437	341990	437	331010	437	346260	437	341800	437	323640	437	343310		437	263950	437	248710	437	252170	437	247970	437	242800	437	246020	437	255280		437	239870	437	252800	437	252430	437
											438	357740	438	395410	438	385010	438	372700	438	388370	438	380350	438	365300	438	389940		438	307690	438	296320	438	298270	438	290050	438	286360	438	295670	438	301810		438	286160	438	299130	438	302800	438
											439	406170	439	445270	439	439620	439	425620	439	444750	439	434130	439	412980	439	440950		439	360990	439	356410	439	355590	439	352170	439	345190	439	347550	439	360130		439	344190	439	350360	439	355880	439
											440	453650	440	496050	440	489580	440	474770	440	491910	440	485450	440	463420	440	498360		440	416880	440	406650	440	408750	440	402000	440	396670	440	396350	440	410940		440	390080	440	406200	440	415560	440
											441	495680	441	539090	441	539310	441	517360	441	541610	441	532700	441	508180	441	541960		441	469250	441	456900	441	461350	441	451230	441	446390	441	453300	441	460900		441	443190	441	451380	441	465340	441
											442	529520	442	579320	442	571750	442	554350	442	575910	442	568450	442	546910	442	582860		442	504180	442	497180	442	495440	442	490580	442	484380	442	487620	442	498830		442	476720	442	493710	442	499560	442
											443	550780	443	604740	443	593240	443	574040	443	606310	443	586910	443	567400	443	604420		443	527770	443	524240	443	528290	443	516950	443	506810	443	510010	443	522900		443	499920	443	517650	443	530200	443
											444	551440	444	608250	444	600220	444	578920	444	604250	444	595960	444	574370	444	605120		444	539430	444	525870	444	524580	444	520190	444	513390	444	514600	444	526280		444	504870	444	519470	444	532260	444
											445	540500	445	593590	445	589810	445	566980	445	594680	445	576100	445	559480	445	597150		445	523060	445	508190	445	514080	445	503910	445	499030	445	503270	445	516880		445	490160	445	507080	445	514160	445
											446	513520	446	563030	446	557190	446	539600	446	565240	446	553140	446	531940	446	566350		446	492020	446	479070	446	484260	446	476230	446	467160	446	474440	446	485070		446	459120	446	473170	446	482980	446
											447	483860	447	525100	447	512810	447	501510	447	523060	447	513210	447	490760	447	523150		447	447100	447	436460	447	440890	447	431730	447	425040	447	429890	447	444270		447	422670	447	434520	447	442630	447
											448	435510	448	469530	448	465790	448	445820	448	474960	448	458700	448	448150	448	469760		448	393670	448	380600	448	380720	448	376710	448	374530	448	378650	448	389620		448	373260	448	384320	448	387600	448
											449	392690	449	420030	449	417030	449	400380	449	421680	449	413650	449	397950	449	419460		449	339320	449	330140	449	330420	449	326190	449	325160	449	330550	449	336930		449	321170	449	333190	449	335350	449
											450	346490	450	372110	450	363990	450	350900	450	368690	450	358800	450	345090	450	370010		450	286960	450	277670	450	276010	450	271310	450	270800	450	275990	450	284180		450	270300	450	279920	450	282380	450
											451	309260	451	328300	451	322840	451	311480	451	324100	451	320020	451	307130	451	323860		451	243630	451	231470	451	234370	451	230670	451	229340	451	234120	451	239750		451	229920	451	233640	451	239720	451
											452	275660	452	292150	452	281560	452	272310	452	287500	452	282140	452	271330	452	285990		452	202790	452	189930	452	194150	452	193980	452	191020	452	196080	452	198820		452	191350	452	195490	452	201430	452
											453	256120	453	261540	453	255990	453	248660	453	260030	453	254580	453	243260	453	260450		453	175830	453	165320	453	168500	453	167100	453	165820	453	168220	453	173580		453	164930	453	166630	453	170440	453
											454	237000	454	239860	454	232450	454	229110	454	236760	454	234290	454	224270	454	232030		454	154790	454	146160	454	145990	454	145320	454	143760	454	146280	454	151110		454	141200	454	149840	454	152660	454
											455	223200	455	226180	455	218410	455	211700	455	221510	455	220050	455	208510	455	217860		455	139090	455	131210	455	130680	455	132160	455	130930	455	133160	455	136770		455	129920	455	136590	455	135810	455
											456	216310	456	213930	456	205130	456	204050	456	209430	456	204420	456	201450	456	210310		456	128860	456	122940	456	122800	456	120610	456	120270	456	123980	456	127990		456	120760	456	125570	456	125530	456
											457	212600	457	207230	457	198980	457	195520	457	202980	457	198050	457	190650	457	202050		457	120510	457	117090	457	115290	457	115000	457	114700	457	118630	457	121520		457	114870	457	117810	457	122310	457
											458	210420	458	201950	458	191310	458	190770	458	194900	458	193520	458	184690	458	194410		458	118300	458	110210	458	110780	458	108290	458	109670	458	112150	458	116660		458	112180	458	113850	458	116430	458
											459	208110	459	199870	459	187810	459	185560	459	193060	459	185160	459	180930	459	188550		459	114620	459	105940	459	108580	459	107600	459	107640	459	110490	459	113440		459	108360	459	110200	459	112980	459
											460	208030	460	193340	460	186110	460	180100	460	185730	460	181250	460	175290	460	183080		460	110140	460	101640	460	103420	460	104180	460	105580	460	108920	460	108390		460	104600	460	106440	460	106950	460
											461	207780	461	192310	461	182360	461	178850	461	181340	461	181850	461	171690	461	181380		461	106530	461	100870	461	101590	461	101640	461	102250	461	105380	461	107080		461	100170	461	102840	461	104910	461
											462	207820	462	188140	462	179660	462	175290	462	177600	462	177070	462	168880	462	177030		462	105530	462	99320	462	97760	462	101070	462	99800	462	102840	462	105750		462	101160	462	101470	462	102140	462
											463	210660	463	185830	463	177130	463	173110	463	175850	463	173440	463	168330	463	172860		463	102630	463	96250	463	94860	463	98060	463	98600	463	99210	463	102700		463	99380	463	100120	463	101310	463
											464	212630	464	184790	464	174870	464	171780	464	174050	464	170300	464	165230	464	171940		464	99420	464	94480	464	93420	464	94890	464	96510	464	97630	464	99640		464	98880	464	98950	464	98760	464
											465	213690	465	182310	465	174040	465	169740	465	170860	465	167670	465	163430	465	165610		465	100420	465	94480	465	92990	465	92820	465	94920	465	96590	465	97620		465	95050	465	97380	465	94720	465
											466	215980	466	181040	466	172640	466	168460	466	172000	466	165960	466	162460	466	163570		466	96730	466	90560	466	91210	466	90650	466	91440	466	93930	466	96150		466	93260	466	94400	466	92840	466
											467	219350	467	182800	467	173170	467	167280	467	166590	467	165090	467	159080	467	161070		467	94300	467	89640	467	89300	467	89870	467	90760	467	93700	467	95930		467	93870	467	93240	467	93910	467
											468	222240	468	179620	468	169110	468	162850	468	166170	468	164220	468	156640	468	156720		468	95520	468	87790	468	87460	468	88210	468	89920	468	92280	468	92550		468	92840	468	89960	468	92430	468
											469	228090	469	178890	469	170730	469	162660	469	165600	469	158720	469	156410	469	154120		469	92260	469	87440	469	86960	469	89340	469	89240	469	90570	469	91240		469	89420	469	90740	469	88890	469
											470	228000	470	177950	470	166850	470	161390	470	162110	470	155710	470	154030	470	151250		470	90240	470	85650	470	86020	470	85310	470	86650	470	90510	470	88210		470	91090	470	88180	470	90280	470
											471	234750	471	176450	471	164700	471	160430	471	159150	471	153880	471	148780	471	151710		471	89580	471	84380	471	85060	471	83500	471	85070	471	88410	471	88710		471	88580	471	87090	471	88010	471
											472	238160	472	177060	472	164190	472	160510	472	157260	472	155390	472	150580	472	145910		472	87850	472	83080	472	79800	472	80420	472	83570	472	86970	472	88240		472	86760	472	86020	472	85680	472
											473	242970	473	177600	473	162890	473	160250	473	154410	473	152980	473	150130	473	148000		473	87190	473	81910	473	79790	473	80820	473	84860	473	85020	473	87840		473	86870	473	83920	473	85690	473
											474	248980	474	178740	474	161740	474	159350	474	156510	474	150170	474	149190	474	141580		474	84810	474	79270	474	78410	474	80100	474	81560	474	85050	474	85140		474	85990	474	80680	474	82630	474
											475	254300	475	174630	475	162840	475	156350	475	155070	475	146450	475	146680	475	139400		475	83530	475	80520	475	77080	475	78830	475	82100	475	83410	475	83050		475	85320	475	80110	475	79250	475
											476	259800	476	176410	476	162040	476	155460	476	149950	476	152110	476	143610	476	137940		476	82330	476	77880	476	75520	476	77250	476	80640	476	80930	476	81970		476	83970	476	78910	476	79770	476
											477	270950	477	178670	477	161150	477	153330	477	149590	477	146870	477	143210	477	134200		477	81670	477	76250	477	74910	477	77410	477	79410	477	81020	477	79180		477	83110	477	76630	477	78010	477
											478	273070	478	179610	478	162670	478	154840	478	147660	478	145830	478	144520	478	135170		478	79740	478	76720	478	73020	478	76580	478	78150	478	82000	478	80150		478	81530	478	77290	478	76150	478
											479	281920	479	181350	479	164800	479	153400	479	149400	479	144190	479	144640	479	130590		479	80890	479	74920	479	73060	479	76430	479	76380	479	80120	479	78390		479	82150	479	76230	479	76710	479
											480	288190	480	184940	480	164550	480	157190	480	146350	480	143770	480	141750	480	130950		480	78050	480	74030	480	71900	480	75090	480	76480	480	78960	480	78320		480	80330	480	75640	480	74500	480
											481	299770	481	187560	481	167490	481	156720	481	150630	481	144490	481	144350	481	126900		481	77930	481	74920	481	72850	481	71800	481	77220	481	77840	481	78750		481	82430	481	75480	481	74970	481
											482	309840	482	190590	482	166010	482	159710	482	150490	482	146720	482	146460	482	129510		482	78170	482	74510	482	69560	482	75110	482	75240	482	79840	482	76180		482	82390	482	73530	482	75820	482
											483	323280	483	194630	483	171720	483	164380	483	149560	483	146680	483	147190	483	129270		483	78890	483	74040	483	69990	483	74070	483	75080	483	78020	483	76930		483	81380	483	73450	483	73460	483
											484	334930	484	197430	484	178160	484	165700	484	153190	484	148640	484	148980	484	127800		484	78170	484	75020	484	69890	484	73240	484	75340	484	79060	484	76900		484	83200	484	73840	484	75220	484
											485	345190	485	203770	485	179060	485	170810	485	156540	485	151210	485	152440	485	130800		485	80710	485	73800	485	70550	485	72600	485	76130	485	78170	485	78180		485	84890	485	72910	485	70740	485
											486	357750	486	208520	486	182340	486	175690	486	159950	486	156570	486	154630	486	128850		486	81000	486	73310	486	70340	486	73850	486	77920	486	78010	486	77490		486	85640	486	75230	486	72740	486
											487	373830	487	218440	487	192280	487	178180	487	163750	487	159010	487	161290	487	132460		487	81890	487	76540	487	71890	487	74440	487	78850	487	79100	487	78340		487	86220	487	76690	487	73930	487
											488	393050	488	225080	488	198180	488	185540	488	169360	488	160390	488	165250	488	132480		488	84020	488	77560	488	72050	488	75820	488	81830	488	81850	488	80030		488	89420	488	75850	488	72230	488
											489	405360	489	235780	489	203450	489	192290	489	175150	489	168570	489	171040	489	137740		489	86050	489	78030	489	74490	489	76160	489	80370	489	82240	489	82560		489	90200	489	76100	489	73910	489
											490	429550	490	243170	490	213460	490	201300	490	178610	490	173080	490	177770	490	139420		490	88050	490	80250	490	74550	490	78180	490	83580	490	85330	490	81460		490	93720	490	79050	490	75110	490
											491	445820	491	255750	491	223790	491	211630	491	189150	491	177550	491	182080	491	144280		491	92700	491	82900	491	76820	491	80500	491	85630	491	85320	491	81290		491	96090	491	81600	491	76440	491
											492	464640	492	269230	492	234480	492	219090	492	197620	492	187960	492	189460	492	150530		492	95700	492	85550	492	77570	492	81750	492	86920	492	86820	492	84610		492	101790	492	82300	492	77690	492
											493	488740	493	283340	493	247250	493	232120	493	207530	493	198720	493	200400	493	154730		493	98580	493	88410	493	80110	493	84310	493	90280	493	89370	493	87420		493	105250	493	84390	493	80610	493
											494	512380	494	297650	494	257570	494	243540	494	215220	494	204370	494	209480	494	160610		494	104310	494	92390	494	84020	494	87490	494	91940	494	91700	494	90330		494	109560	494	88580	494	79170	494
											495	537900	495	313320	495	275810	495	254220	495	224200	495	216540	495	218230	495	165290		495	107620	495	95270	495	86590	495	90340	495	93430	495	95190	495	91630		495	116210	495	89230	495	83110	495
											496	559770	496	332340	496	289120	496	269950	496	240360	496	226430	496	234160	496	171440		496	114140	496	101270	496	86950	496	92170	496	100650	496	98410	496	93180		496	121780	496	92430	496	87330	496
											497	582690	497	349850	497	309540	497	288520	497	251010	497	240190	497	245180	497	181310		497	119220	497	105130	497	91590	497	97960	497	104490	497	103030	497	97710		497	127930	497	95060	497	88560	497
											498	606750	498	366690	498	323820	498	304630	498	264800	498	253570	498	259540	498	190870		498	126280	498	109570	498	98020	498	97650	498	104640	498	107490	498	100650		498	132470	498	100730	498	91210	498
											499	639990	499	383590	499	345020	499	319630	499	279420	499	272320	499	277290	499	199650		499	131970	499	114960	499	100400	499	106130	499	111650	499	110930	499	105130		499	138920	499	102840	499	93210	499
											500	667830	500	408580	500	365680	500	338820	500	295810	500	284170	500	292750	500	212790		500	139120	500	120930	500	106380	500	109570	500	114230	500	112560	500	108150		500	146960	500	108380	500	98330	500
											501	695510	501	432240	501	387770	501	361480	501	315180	501	298620	501	310240	501	225370		501	149290	501	125290	501	110830	501	114770	501	119550	501	118480	501	112660		501	152610	501	111700	501	97580	501
											502	728570	502	457360	502	409870	502	379200	502	331980	502	318780	502	329940	502	237180		502	157600	502	134030	502	115150	502	120500	502	124680	502	124140	502	116700		502	162720	502	115690	502	104590	502
											503	764790	503	480670	503	435370	503	407140	503	354020	503	338980	503	348530	503	252000		503	167900	503	140710	503	120550	503	123870	503	131690	503	129360	503	122340		503	171070	503	122530	503	109310	503
											504	788120	504	503650	504	459200	504	423580	504	375990	504	358420	504	374360	504	264860		504	173840	504	147780	504	126150	504	128800	504	136160	504	136490	504	124020		504	181150	504	128790	504	113290	504
											505	824190	505	533680	505	486560	505	457780	505	399960	505	380940	505	394530	505	281530		505	187420	505	154890	505	133070	505	135160	505	147210	505	139560	505	131250		505	194070	505	130120	505	115360	505
											506	858230	506	561890	506	516380	506	483830	506	422750	506	405580	506	414090	506	294140		506	197330	506	166040	506	139840	506	144330	506	152120	506	144280	506	137370		506	203990	506	140070	506	120890	506
											507	902240	507	589080	507	545730	507	512790	507	444810	507	427100	507	444550	507	315890		507	209760	507	171430	507	147750	507	148780	507	160380	507	153130	507	142150		507	215410	507	146010	507	128030	507
											508	932970	508	620030	508	575310	508	536990	508	471870	508	454110	508	468810	508	332710		508	222480	508	181660	508	154500	508	158200	508	165170	508	158800	508	146220		508	226700	508	153580	508	132210	508
											509	962230	509	655070	509	611910	509	573550	509	502250	509	486090	509	500250	509	351540		509	237320	509	190700	509	157930	509	163200	509	173540	509	167520	509	153500		509	242160	509	163490	509	137110	509
											510	1001440	510	685610	510	642820	510	601720	510	527960	510	506480	510	532110	510	372330		510	249090	510	201520	510	168650	510	170320	510	181140	510	175110	510	158930		510	251960	510	166490	510	144840	510
											511	1033070	511	726560	511	677030	511	632920	511	558570	511	538580	511	559890	511	397630		511	261150	511	214680	511	173840	511	178600	511	189340	511	180820	511	165700		511	266680	511	176020	511	149600	511
											512	1077390	512	752310	512	709520	512	669540	512	593780	512	566260	512	595280	512	419320		512	277370	512	223250	512	184220	512	188680	512	200590	512	189160	512	175040		512	283840	512	184950	512	156380	512
											513	1111240	513	786340	513	744850	513	700270	513	619500	513	596080	513	623430	513	440020		513	292310	513	237870	513	193660	513	196320	513	208940	513	197310	513	184430		513	297140	513	190850	513	162420	513
											514	1151310	514	819510	514	783150	514	740770	514	649840	514	629290	514	658020	514	464160		514	314170	514	245350	514	202870	514	208290	514	217760	514	207040	514	191300		514	309110	514	198380	514	169130	514
											515	1179030	515	856850	515	815170	515	777110	515	689030	515	662180	515	691840	515	485210		515	327140	515	258580	515	212510	515	214460	515	229090	515	213860	515	196010		515	325290	515	207890	515	178930	515
											516	1213720	516	893280	516	858110	516	814550	516	718600	516	704300	516	736330	516	514370		516	348060	516	275850	516	222990	516	224370	516	240180	516	225240	516	205570		516	342230	516	222560	516	181880	516
											517	1253200	517	933910	517	900680	517	850890	517	755070	517	733190	517	771910	517	546310		517	361010	517	285150	517	232650	517	236140	517	251420	517	236410	517	213030		517	359480	517	226510	517	192240	517
											518	1284190	518	971040	518	932680	518	889620	518	787350	518	769980	518	804330	518	571920		518	377320	518	299590	518	242610	518	245910	518	256880	518	245310	518	219080		518	382610	518	239260	518	198200	518
											519	1322720	519	1004410	519	979690	519	926020	519	825620	519	808220	519	845430	519	600170		519	399760	519	312740	519	253220	519	253180	519	272100	519	253680	519	233900		519	395920	519	250630	519	206750	519
											520	1366780	520	1039620	520	1015950	520	968440	520	860270	520	842880	520	882480	520	633920		520	416220	520	328440	520	266530	520	267510	520	281030	520	265080	520	241170		520	417230	520	261770	520	218150	520
											521	1401810	521	1083290	521	1056900	521	1011100	521	900120	521	885160	521	923900	521	657080		521	435970	521	344140	521	279660	521	276870	521	295710	521	276870	521	249310		521	436350	521	270620	521	222900	521
											522	1431060	522	1113480	522	1101020	522	1052630	522	935010	522	922030	522	965840	522	683670		522	456850	522	360170	522	289870	522	290820	522	307780	522	291480	522	256630		522	455110	522	282600	522	232720	522
											523	1468950	523	1165350	523	1146130	523	1096170	523	974290	523	970470	523	1010060	523	722510		523	476950	523	378290	523	304250	523	299950	523	320620	523	302570	523	272710		523	476190	523	295010	523	243650	523
											524	1507260	524	1206990	524	1192980	524	1143770	524	1019290	524	1002150	524	1048620	524	754800		524	500880	524	391720	524	319040	524	316350	524	335320	524	310330	524	282850		524	495310	524	307880	524	251850	524
											525	1542410	525	1240410	525	1224200	525	1186430	525	1059980	525	1046790	525	1103230	525	785730		525	517990	525	409860	525	326580	525	327240	525	349990	525	324420	525	295910		525	518590	525	320470	525	264830	525
											526	1581680	526	1280140	526	1267640	526	1224070	526	1099120	526	1088200	526	1145880	526	821680		526	543860	526	426980	526	341660	526	342860	526	363180	526	338180	526	305140		526	539820	526	335940	526	272730	526
											527	1602780	527	1317510	527	1326990	527	1277530	527	1146350	527	1135200	527	1194270	527	859460		527	566280	527	444580	527	356560	527	356190	527	381630	527	355360	527	315120		527	561320	527	350710	527	285480	527
											528	1653750	528	1363210	528	1362090	528	1326030	528	1184970	528	1181490	528	1236010	528	891970		528	592450	528	462830	528	370940	528	371630	528	395020	528	369120	528	327590		528	591240	528	364080	528	296860	528
											529	1688530	529	1405040	529	1411910	529	1370320	529	1230730	529	1226420	529	1294070	529	935980		529	614400	529	487600	529	389950	529	387630	529	408570	529	383220	529	346640		529	611500	529	377060	529	308210	529
											530	1717910	530	1448040	530	1450270	530	1412410	530	1278210	530	1274170	530	1341600	530	973350		530	641220	530	504480	530	401970	530	399860	530	430100	530	400530	530	361850		530	641190	530	392100	530	319810	530
											531	1755270	531	1491850	531	1497810	531	1471710	531	1319020	531	1319740	531	1388620	531	1014350		531	666120	531	522500	531	419390	531	420760	531	444610	531	414800	531	370800		531	662970	531	414530	531	336990	531
											532	1793010	532	1529100	532	1541590	532	1508730	532	1363610	532	1362560	532	1435490	532	1051970		532	689300	532	544130	532	437560	532	430650	532	463350	532	428710	532	387390		532	690530	532	428330	532	345020	532
											533	1829050	533	1573020	533	1600680	533	1552900	533	1403040	533	1419240	533	1494970	533	1096590		533	715810	533	562930	533	457090	533	452720	533	483440	533	444000	533	404360		533	722760	533	440950	533	358550	533
											534	1867980	534	1612370	534	1647790	534	1607380	534	1455890	534	1465690	534	1542770	534	1135350		534	740740	534	590630	534	469470	534	467200	534	498080	534	462610	534	414720		534	746810	534	462150	534	375890	534
											535	1902300	535	1660370	535	1683040	535	1660560	535	1497470	535	1513170	535	1592130	535	1172730		535	768740	535	607230	535	490000	535	486340	535	520070	535	483430	535	432350		535	772730	535	480850	535	388010	535
											536	1932180	536	1695150	536	1738590	536	1704410	536	1540220	536	1561980	536	1644750	536	1219100		536	792750	536	631100	536	511980	536	509120	536	538410	536	500520	536	443000		536	807630	536	497150	536	402610	536
											537	1975270	537	1736730	537	1784660	537	1757920	537	1594520	537	1611220	537	1701240	537	1258500		537	818340	537	653840	537	524610	537	526060	537	560860	537	522200	537	463670		537	835840	537	512310	537	416890	537
											538	2010940	538	1778940	538	1831190	538	1804850	538	1649850	538	1661940	538	1750290	538	1304260		538	854520	538	677730	538	539200	538	543650	538	579980	538	542050	538	485850		538	857100	538	532290	538	435070	538
											539	2043680	539	1830130	539	1874790	539	1860660	539	1693520	539	1710690	539	1801030	539	1348760		539	878880	539	700980	539	564080	539	565470	539	602870	539	558880	539	497410		539	893810	539	550440	539	451190	539
											540	2076620	540	1871190	540	1926000	540	1903250	540	1730930	540	1756960	540	1854410	540	1389060		540	906730	540	720650	540	588350	540	583260	540	621330	540	580180	540	513200		540	922560	540	571530	540	466270	540
											541	2119560	541	1908900	541	1980500	541	1958540	541	1783250	541	1812400	541	1917260	541	1434670		541	935010	541	745530	541	604110	541	602580	541	642740	541	609970	541	535040		541	948730	541	595110	541	484970	541
											542	2141060	542	1952320	542	2029590	542	2000770	542	1828790	542	1858650	542	1964590	542	1480210		542	963670	542	772620	542	628020	542	623360	542	666820	542	623070	542	553380		542	982760	542	610800	542	500940	542
											543	2185570	543	1999150	543	2067700	543	2051050	543	1868800	543	1914170	543	2013640	543	1525290		543	992790	543	801280	543	647340	543	644870	543	694590	543	645200	543	573670		543	1010400	543	634510	543	517730	543
											544	2213860	544	2034990	544	2117180	544	2106500	544	1924420	544	1961450	544	2070370	544	1566600		544	1027050	544	819280	544	675070	544	672490	544	714210	544	663210	544	589740		544	1045190	544	650890	544	534060	544
											545	2251140	545	2081050	545	2161720	545	2157010	545	1968070	545	2012570	545	2126690	545	1613880		545	1046170	545	853320	545	689720	545	690530	545	729580	545	685880	545	607870		545	1084420	545	677160	545	548930	545
											546	2294390	546	2122880	546	2209230	546	2213120	546	2018930	546	2065780	546	2174580	546	1656860		546	1081550	546	875060	546	709150	546	717460	546	761870	546	713420	546	631990		546	1109800	546	698230	546	570690	546
											547	2325160	547	2167180	547	2258960	547	2257930	547	2057180	547	2111520	547	2236390	547	1712080		547	1106800	547	896690	547	726250	547	736480	547	781130	547	736110	547	655140		547	1140480	547	719330	547	584730	547
											548	2348030	548	2212660	548	2312430	548	2309840	548	2105720	548	2163160	548	2282750	548	1754420		548	1139640	548	923830	548	753480	548	756860	548	806970	548	758050	548	674850		548	1181210	548	745730	548	608890	548
											549	2390310	549	2248520	549	2352870	549	2356140	549	2154370	549	2225210	549	2345520	549	1802520		549	1169540	549	952140	549	778570	549	781120	549	828300	549	784570	549	698970		549	1201940	549	761990	549	627450	549
											550	2410470	550	2289400	550	2398140	550	2403900	550	2195170	550	2250560	550	2401280	550	1834150		550	1198040	550	970970	550	796000	550	803980	550	859780	550	801910	550	714480		550	1243010	550	787210	550	650000	550
											551	2446560	551	2320910	551	2439180	551	2448650	551	2241420	551	2308290	551	2440810	551	1885230		551	1226660	551	1002120	551	816720	551	824170	551	887480	551	818280	551	736740		551	1266330	551	805450	551	667010	551
											552	2476130	552	2369520	552	2483870	552	2496490	552	2275060	552	2355330	552	2495340	552	1940440		552	1255830	552	1030040	552	838720	552	847880	552	901210	552	853600	552	757240		552	1302180	552	824630	552	685000	552
											553	2508760	553	2413280	553	2530100	553	2543940	553	2331590	553	2408780	553	2553620	553	1975260		553	1283930	553	1051940	553	862850	553	875120	553	925540	553	879180	553	774320		553	1338060	553	849630	553	706350	553
											554	2542220	554	2445660	554	2577770	554	2595630	554	2373980	554	2466410	554	2595110	554	2014350		554	1309860	554	1075470	554	882850	554	893560	554	954260	554	901600	554	798720		554	1369000	554	875950	554	724720	554
											555	2574860	555	2492450	555	2609510	555	2626880	555	2422080	555	2496630	555	2636520	555	2062410		555	1332100	555	1106630	555	902740	555	911060	555	971860	555	922230	555	821610		555	1404490	555	892580	555	742660	555
											556	2595760	556	2520610	556	2662160	556	2674400	556	2456990	556	2546000	556	2692850	556	2109840		556	1357780	556	1122610	556	929540	556	930770	556	997610	556	947960	556	838680		556	1425300	556	917910	556	762120	556
											557	2626480	557	2564270	557	2702290	557	2725010	557	2494450	557	2586580	557	2745100	557	2147050		557	1384330	557	1149760	557	947550	557	954220	557	1015570	557	966450	557	866190		557	1459620	557	940070	557	780730	557
											558	2653650	558	2587230	558	2744160	558	2768070	558	2542410	558	2633320	558	2780210	558	2179150		558	1420360	558	1172400	558	970880	558	981760	558	1041790	558	995080	558	880670		558	1482520	558	962560	558	800900	558
											559	2686300	559	2630800	559	2780070	559	2812910	559	2581310	559	2687380	559	2835240	559	2236070		559	1444400	559	1190670	559	985860	559	996680	559	1076510	559	1018550	559	903810		559	1525350	559	987660	559	821780	559
											560	2718280	560	2674660	560	2815680	560	2860220	560	2616610	560	2724550	560	2877170	560	2263970		560	1471600	560	1210550	560	1011450	560	1023150	560	1085660	560	1037980	560	920830		560	1552070	560	1011830	560	843800	560
											561	2745630	561	2692320	561	2857890	561	2896230	561	2654610	561	2761290	561	2921420	561	2306980		561	1493700	561	1246760	561	1035330	561	1039440	561	1120450	561	1060970	561	946070		561	1579330	561	1020800	561	854420	561
											562	2768080	562	2741750	562	2889480	562	2958400	562	2694850	562	2808610	562	2965750	562	2342980		562	1520810	562	1272080	562	1056860	562	1065650	562	1135820	562	1079340	562	968750		562	1605850	562	1043990	562	877640	562
											563	2791390	563	2773270	563	2937050	563	2989490	563	2737570	563	2849270	563	3017550	563	2385220		563	1548690	563	1284760	563	1074890	563	1087960	563	1162510	563	1105150	563	981800		563	1632880	563	1067250	563	891280	563
											564	2819030	564	2806820	564	2977350	564	3025550	564	2770330	564	2892680	564	3065750	564	2422420		564	1563380	564	1318820	564	1099210	564	1102190	564	1178460	564	1127070	564	1006670		564	1662270	564	1081260	564	912550	564
											565	2836340	565	2833180	565	3006000	565	3058720	565	2817690	565	2925320	565	3086750	565	2464080		565	1591930	565	1331220	565	1107630	565	1127910	565	1200190	565	1150100	565	1026930		565	1681160	565	1111100	565	930590	565
											566	2869740	566	2872600	566	3044450	566	3104080	566	2849790	566	2971010	566	3149010	566	2492560		566	1620680	566	1361470	566	1137640	566	1152670	566	1222000	566	1171240	566	1040570		566	1717460	566	1125350	566	948000	566
											567	2889610	567	2905330	567	3082750	567	3151260	567	2884620	567	3006880	567	3180950	567	2532300		567	1648590	567	1379040	567	1150040	567	1165070	567	1245850	567	1194540	567	1069650		567	1741570	567	1154420	567	968150	567
											568	2918580	568	2928030	568	3128520	568	3188470	568	2913780	568	3049970	568	3230920	568	2563820		568	1664920	568	1399330	568	1169860	568	1183690	568	1262080	568	1210120	568	1089360		568	1774090	568	1163850	568	984080	568
											569	2930240	569	2957530	569	3158410	569	3223550	569	2962600	569	3080650	569	3265240	569	2608640		569	1686210	569	1421210	569	1188570	569	1211590	569	1284230	569	1229510	569	1107500		569	1799020	569	1190130	569	1001890	569
											570	2961440	570	2993640	570	3189650	570	3273070	570	2998560	570	3120050	570	3306480	570	2637140		570	1714600	570	1450490	570	1207760	570	1222630	570	1307090	570	1258480	570	1123490		570	1819080	570	1208830	570	1017680	570
											571	2977630	571	3025460	571	3217310	571	3297120	571	3031370	571	3160600	571	3348490	571	2677270		571	1729460	571	1467770	571	1228460	571	1246670	571	1319690	571	1271220	571	1142710		571	1850260	571	1219280	571	1041140	571
											572	2999130	572	3050130	572	3246400	572	3331110	572	3057660	572	3198080	572	3381310	572	2706560		572	1754370	572	1482700	572	1240560	572	1264930	572	1345190	572	1289900	572	1157470		572	1866760	572	1243440	572	1056350	572
											573	3015150	573	3074900	573	3279310	573	3378190	573	3092200	573	3229280	573	3423180	573	2731030		573	1776180	573	1499770	573	1257990	573	1277480	573	1360980	573	1313060	573	1172370		573	1897160	573	1264580	573	1073140	573
											574	3048650	574	3114050	574	3314170	574	3399750	574	3117780	574	3273160	574	3458660	574	2769970		574	1793860	574	1522160	574	1276960	574	1293640	574	1382310	574	1327200	574	1195190		574	1924060	574	1279570	574	1082020	574
											575	3055920	575	3131570	575	3353440	575	3442150	575	3157820	575	3297440	575	3498200	575	2808910		575	1820630	575	1543560	575	1287720	575	1312200	575	1403080	575	1356820	575	1214300		575	1941130	575	1302720	575	1102170	575
											576	3079600	576	3162120	576	3376580	576	3469990	576	3189540	576	3347510	576	3528500	576	2831620		576	1832510	576	1555900	576	1307540	576	1340180	576	1419660	576	1370620	576	1224660		576	1968400	576	1312910	576	1119840	576
											577	3103180	577	3184400	577	3413710	577	3508140	577	3219200	577	3370760	577	3566500	577	2865980		577	1863340	577	1568820	577	1325670	577	1353570	577	1442130	577	1389870	577	1250190		577	2000750	577	1330920	577	1133420	577
											578	3112770	578	3218200	578	3437790	578	3537720	578	3251400	578	3398690	578	3601660	578	2892300		578	1875210	578	1592860	578	1340640	578	1374400	578	1456440	578	1413740	578	1255970		578	2020060	578	1347570	578	1152890	578
											579	3128450	579	3239350	579	3467580	579	3569480	579	3266360	579	3433350	579	3636840	579	2925420		579	1903370	579	1618310	579	1359790	579	1378070	579	1479920	579	1420130	579	1282720		579	2041330	579	1362630	579	1166260	579
											580	3140540	580	3267630	580	3486540	580	3601250	580	3298550	580	3457200	580	3667660	580	2948880		580	1915900	580	1630110	580	1376600	580	1401750	580	1494710	580	1441950	580	1294050		580	2059230	580	1373820	580	1181550	580
											581	3167250	581	3289550	581	3517490	581	3639110	581	3320630	581	3494840	581	3702800	581	2975170		581	1937040	581	1641700	581	1390440	581	1416050	581	1506010	581	1458700	581	1312530		581	2083970	581	1399370	581	1190340	581
											582	3167100	582	3315650	582	3553420	582	3672260	582	3357720	582	3521310	582	3730220	582	3009450		582	1947590	582	1663300	582	1405170	582	1435490	582	1538050	582	1477610	582	1324500		582	2102650	582	1410870	582	1209770	582
											583	3192040	583	3336300	583	3576190	583	3698480	583	3377050	583	3551170	583	3768130	583	3037740		583	1963550	583	1679410	583	1428840	583	1451380	583	1542370	583	1488690	583	1341020		583	2124690	583	1431690	583	1221690	583
											584	3203600	584	3364740	584	3603860	584	3726600	584	3413890	584	3575730	584	3800890	584	3066650		584	1983790	584	1693220	584	1430480	584	1467370	584	1562690	584	1509350	584	1360060		584	2141910	584	1443800	584	1239420	584
											585	3223110	585	3372470	585	3638910	585	3760490	585	3430720	585	3608540	585	3819280	585	3088950		585	2011750	585	1718630	585	1452470	585	1487430	585	1577720	585	1525790	585	1377270		585	2167810	585	1465750	585	1257530	585
											586	3230860	586	3397190	586	3649540	586	3786670	586	3460460	586	3633730	586	3854680	586	3115140		586	2026230	586	1723500	586	1458730	586	1499540	586	1593870	586	1546670	586	1389820		586	2189390	586	1478680	586	1266640	586
											587	3245320	587	3417120	587	3671600	587	3812740	587	3483910	587	3651800	587	3880850	587	3140430		587	2042300	587	1751520	587	1475250	587	1512630	587	1609810	587	1562700	587	1400760		587	2208450	587	1488550	587	1279500	587
											588	3253540	588	3437230	588	3697370	588	3837720	588	3515750	588	3682980	588	3913420	588	3169690		588	2058920	588	1756530	588	1487290	588	1525470	588	1615490	588	1572560	588	1418340		588	2218400	588	1504420	588	1292270	588
											589	3258490	589	3456440	589	3720920	589	3856960	589	3523700	589	3701020	589	3945340	589	3206970		589	2072090	589	1778440	589	1503690	589	1538430	589	1633270	589	1582750	589	1429530		589	2245570	589	1512470	589	1304340	589
											590	3269440	590	3482720	590	3738290	590	3883280	590	3546620	590	3731240	590	3964980	590	3225880		590	2099140	590	1798400	590	1521390	590	1547310	590	1656430	590	1602780	590	1438220		590	2259080	590	1534390	590	1315720	590
											591	3282540	591	3498940	591	3757950	591	3900900	591	3582750	591	3740880	591	3994430	591	3244860		591	2092360	591	1800040	591	1528930	591	1569640	591	1670180	591	1615180	591	1453900		591	2284490	591	1551010	591	1329680	591
											592	3287070	592	3511330	592	3788670	592	3937860	592	3603990	592	3769610	592	4021350	592	3271020		592	2119050	592	1816680	592	1545860	592	1579420	592	1684500	592	1634610	592	1467880		592	2302510	592	1565220	592	1337570	592
											593	3300930	593	3532970	593	3793530	593	3948180	593	3626850	593	3782680	593	4051470	593	3289640		593	2132710	593	1834850	593	1560000	593	1600180	593	1697010	593	1645040	593	1478160		593	2314880	593	1572510	593	1359820	593
											594	3298500	594	3547570	594	3820750	594	3987550	594	3649810	594	3803910	594	4069800	594	3312740		594	2151330	594	1848640	594	1570510	594	1604850	594	1710140	594	1660750	594	1492180		594	2331730	594	1591160	594	1362470	594
											595	3307220	595	3564080	595	3842740	595	4005440	595	3670740	595	3810870	595	4101900	595	3329500		595	2164130	595	1864660	595	1593390	595	1617200	595	1723340	595	1676990	595	1505760		595	2352200	595	1599120	595	1378830	595
											596	3309940	596	3572870	596	3859840	596	4021620	596	3676270	596	3833520	596	4121950	596	3345390		596	2180640	596	1876290	596	1591380	596	1632030	596	1729480	596	1688810	596	1516170		596	2365050	596	1622000	596	1390790	596
											597	3320930	597	3593500	597	3872020	597	4035330	597	3708500	597	3858760	597	4148520	597	3381870		597	2189080	597	1885660	597	1602080	597	1642010	597	1755480	597	1698120	597	1530610		597	2388770	597	1623600	597	1397150	597
											598	3323450	598	3602920	598	3900120	598	4060390	598	3720390	598	3870330	598	4165470	598	3397350		598	2212940	598	1908580	598	1619780	598	1655430	598	1762450	598	1714860	598	1535870		598	2402300	598	1639940	598	1403890	598
											599	3331630	599	3606300	599	3910750	599	4085880	599	3738860	599	3873350	599	4180600	599	3412830		599	2214930	599	1917430	599	1628580	599	1661570	599	1774980	599	1723630	599	1558640		599	2412740	599	1644790	599	1414190	599
											600	3334590	600	3628500	600	3927600	600	4092310	600	3745180	600	3907590	600	4198810	600	3435850		600	2231080	600	1929340	600	1637060	600	1674910	600	1790860	600	1735960	600	1561880		600	2422160	600	1660530	600	1422580	600
											601	3327040	601	3638670	601	3929170	601	4110870	601	3764080	601	3906710	601	4216060	601	3442870		601	2237470	601	1939940	601	1646990	601	1685910	601	1790820	601	1756610	601	1577810		601	2444910	601	1671640	601	1430490	601
											602	3342470	602	3644730	602	3940780	602	4128880	602	3777550	602	3926460	602	4246040	602	3470020		602	2259580	602	1951360	602	1662710	602	1700710	602	1811380	602	1759270	602	1595810		602	2453190	602	1682800	602	1445280	602
											603	3346740	603	3656830	603	3953490	603	4140150	603	3790260	603	3932830	603	4259300	603	3484620		603	2270410	603	1965170	603	1668330	603	1708360	603	1812350	603	1777960	603	1605200		603	2473310	603	1698320	603	1455970	603
											604	3338520	604	3661180	604	3961310	604	4152400	604	3801130	604	3934700	604	4263390	604	3502010		604	2271390	604	1963830	604	1679910	604	1716670	604	1826550	604	1782260	604	1605510		604	2480550	604	1700990	604	1466970	604
											605	3328820	605	3670600	605	3984660	605	4154950	605	3826120	605	3944280	605	4286440	605	3515640		605	2280990	605	1976030	605	1690440	605	1731420	605	1836600	605	1799730	605	1617410		605	2487720	605	1713690	605	1476470	605
											606	3333650	606	3677510	606	3995380	606	4178340	606	3838250	606	3963380	606	4304530	606	3524180		606	2294520	606	1986090	606	1698560	606	1734050	606	1853160	606	1804000	606	1620450		606	2504710	606	1718900	606	1482900	606
											607	3331260	607	3684450	607	4004110	607	4192550	607	3845000	607	3971370	607	4318160	607	3537400		607	2298390	607	1999540	607	1707380	607	1748130	607	1859140	607	1812070	607	1632630		607	2515610	607	1729910	607	1492760	607
											608	3333340	608	3689180	608	4015790	608	4195230	608	3852270	608	3981230	608	4333960	608	3545980		608	2308010	608	2004170	608	1712180	608	1747900	608	1873260	608	1823110	608	1647210		608	2530540	608	1731030	608	1502660	608
											609	3322400	609	3685940	609	4017440	609	4203460	609	3871760	609	3992770	609	4339430	609	3564490		609	2323660	609	2017780	609	1713440	609	1756860	609	1870650	609	1831090	609	1647680		609	2540450	609	1746310	609	1501960	609
											610	3328790	610	3699120	610	4023780	610	4212070	610	3858080	610	4011170	610	4353080	610	3580820		610	2319730	610	2021870	610	1724970	610	1766950	610	1882370	610	1836260	610	1663180		610	2548420	610	1760010	610	1519830	610
											611	3322800	611	3712290	611	4032010	611	4216850	611	3871660	611	4013040	611	4351210	611	3587090		611	2328190	611	2031060	611	1734200	611	1777810	611	1884460	611	1838340	611	1669080		611	2555460	611	1768050	611	1533510	611
											612	3312180	612	3710530	612	4049720	612	4222450	612	3883140	612	4008600	612	4388420	612	3599040		612	2342880	612	2034550	612	1731770	612	1783370	612	1899080	612	1847430	612	1672250		612	2566660	612	1780270	612	1532840	612
											613	3314390	613	3699880	613	4035240	613	4235020	613	3888510	613	4022950	613	4386100	613	3619620		613	2359130	613	2045840	613	1745670	613	1790830	613	1906880	613	1853150	613	1682420		613	2578040	613	1767500	613	1533290	613
											614	3312880	614	3696670	614	4043300	614	4243130	614	3894980	614	4031740	614	4380070	614	3612460		614	2349060	614	2056650	614	1760350	614	1806110	614	1920580	614	1867290	614	1690280		614	2593200	614	1785140	614	1542700	614
											615	3297800	615	3702670	615	4043700	615	4241600	615	3906190	615	4045620	615	4405670	615	3629100		615	2360220	615	2053350	615	1757880	615	1801680	615	1915780	615	1882950	615	1703520		615	2589830	615	1787880	615	1546680	615
											616	3286260	616	3700720	616	4049840	616	4242380	616	3901330	616	4037580	616	4400080	616	3643470		616	2361290	616	2065500	616	1759520	616	1810110	616	1924110	616	1886970	616	1699790		616	2597880	616	1800640	616	1549220	616
											617	3285210	617	3704400	617	4046120	617	4242860	617	3899940	617	4059940	617	4407560	617	3638010		617	2363090	617	2063210	617	1766040	617	1824460	617	1932100	617	1892620	617	1707540		617	2605410	617	1810010	617	1558810	617
											618	3277860	618	3697450	618	4055140	618	4247330	618	3913650	618	4051800	618	4419880	618	3645140		618	2374090	618	2071590	618	1775440	618	1815510	618	1935650	618	1888870	618	1719520		618	2613120	618	1806790	618	1564720	618
											619	3269550	619	3694240	619	4058610	619	4246090	619	3906310	619	4057760	619	4422140	619	3643930		619	2376660	619	2079220	619	1776390	619	1817410	619	1939510	619	1899390	619	1715320		619	2616540	619	1809710	619	1569690	619
											620	3249600	620	3696980	620	4043730	620	4240950	620	3913330	620	4048450	620	4426370	620	3661600		620	2384670	620	2089630	620	1785260	620	1836810	620	1945010	620	1903920	620	1714300		620	2621100	620	1825300	620	1580020	620
											621	3243080	621	3694990	621	4054550	621	4240670	621	3917190	621	4075130	621	4412430	621	3668420		621	2385510	621	2079210	621	1783710	621	1833200	621	1952190	621	1908270	621	1731850		621	2626060	621	1823650	621	1572500	621
											622	3233870	622	3681190	622	4055030	622	4240550	622	3919140	622	4057820	622	4436740	622	3671580		622	2380140	622	2082580	622	1784430	622	1834750	622	1958940	622	1906790	622	1732840		622	2631150	622	1825110	622	1582680	622
											623	3235480	623	3687110	623	4047780	623	4236780	623	3914050	623	4072740	623	4431280	623	3661580		623	2381060	623	2084510	623	1794500	623	1852820	623	1958930	623	1927810	623	1737890		623	2636740	623	1831690	623	1588160	623
											624	3217240	624	3679560	624	4035670	624	4236830	624	3921170	624	4079550	624	4437090	624	3662710		624	2381570	624	2096660	624	1795940	624	1851230	624	1968740	624	1916410	624	1744300		624	2643940	624	1831030	624	1595030	624
											625	3199380	625	3673540	625	4026400	625	4225500	625	3909530	625	4082970	625	4428900	625	3673120		625	2389110	625	2101660	625	1801600	625	1849950	625	1958050	625	1924960	625	1745530		625	2644660	625	1835960	625	1599590	625
											626	3200450	626	3665860	626	4030210	626	4222640	626	3918580	626	4088740	626	4430520	626	3684410		626	2392270	626	2108590	626	1798640	626	1854060	626	1970710	626	1924720	626	1748770		626	2638370	626	1841640	626	1589420	626
											627	3187040	627	3666630	627	4027780	627	4212990	627	3900660	627	4075980	627	4424950	627	3674870		627	2397990	627	2102860	627	1798030	627	1850600	627	1968860	627	1938800	627	1749080		627	2648980	627	1843350	627	1597550	627
											628	3175290	628	3647470	628	4028980	628	4207820	628	3899310	628	4085140	628	4423510	628	3673770		628	2388230	628	2107020	628	1805990	628	1845530	628	1971070	628	1931470	628	1751050		628	2652330	628	1856900	628	1602510	628
											629	3150150	629	3635720	629	4018960	629	4202300	629	3907380	629	4089600	629	4426260	629	3669810		629	2390130	629	2101600	629	1802150	629	1850320	629	1980550	629	1935260	629	1763190		629	2660720	629	1847800	629	1608150	629
											630	3141280	630	3636290	630	4018580	630	4191940	630	3903020	630	4081900	630	4418070	630	3668160		630	2397420	630	2108680	630	1814070	630	1863710	630	1970440	630	1930750	630	1757760		630	2652760	630	1854780	630	1602720	630
											631	3126290	631	3627470	631	4005480	631	4166050	631	3893960	631	4092920	631	4403650	631	3675100		631	2389970	631	2104290	631	1803310	631	1853450	631	1980700	631	1934280	631	1763460		631	2655110	631	1860150	631	1611840	631
											632	3131220	632	3612770	632	3988200	632	4174200	632	3884670	632	4083020	632	4418570	632	3667640		632	2400750	632	2114930	632	1811090	632	1863100	632	1988060	632	1943100	632	1766090		632	2655970	632	1855130	632	1614190	632
											633	3114410	633	3604600	633	3987610	633	4165880	633	3884960	633	4079120	633	4413870	633	3674480		633	2389870	633	2105030	633	1813660	633	1860950	633	1981470	633	1944680	633	1761240		633	2660340	633	1868600	633	1609360	633
											634	3087050	634	3596990	634	3983820	634	4161400	634	3862490	634	4071490	634	4401370	634	3671310		634	2394190	634	2120030	634	1811050	634	1855760	634	1984350	634	1947110	634	1765360		634	2659950	634	1858380	634	1608300	634
											635	3077720	635	3588820	635	3971500	635	4144860	635	3859360	635	4066020	635	4415560	635	3670480		635	2392280	635	2107480	635	1816420	635	1863720	635	1986300	635	1953440	635	1764430		635	2659490	635	1859690	635	1618140	635
											636	3057210	636	3576610	636	3964130	636	4131370	636	3864860	636	4066990	636	4401880	636	3657760		636	2381240	636	2103400	636	1803870	636	1872470	636	1986820	636	1954040	636	1780870		636	2651000	636	1861750	636	1613690	636
											637	3043200	637	3571970	637	3952530	637	4124290	637	3852450	637	4067090	637	4390260	637	3663370		637	2381180	637	2113780	637	1807590	637	1869290	637	1983000	637	1951230	637	1775440		637	2652080	637	1856090	637	1620040	637
											638	3033740	638	3552680	638	3935110	638	4110500	638	3842900	638	4052130	638	4382350	638	3655840		638	2379720	638	2106640	638	1814790	638	1870950	638	1987420	638	1948210	638	1767450		638	2656590	638	1859820	638	1615040	638
											639	3010110	639	3540790	639	3917600	639	4102290	639	3820460	639	4038420	639	4369040	639	3652350		639	2375090	639	2102100	639	1805300	639	1871260	639	1990670	639	1946260	639	1770360		639	2652980	639	1865880	639	1608820	639
											640	2992220	640	3513960	640	3914520	640	4077340	640	3819920	640	4038580	640	4362470	640	3645890		640	2364390	640	2100490	640	1806910	640	1867590	640	1986970	640	1950150	640	1775180		640	2645770	640	1847920	640	1614130	640
											641	2977030	641	3512180	641	3892640	641	4058150	641	3815390	641	4024420	641	4345490	641	3641410		641	2361870	641	2096470	641	1809220	641	1865290	641	1979650	641	1951270	641	1778280		641	2644000	641	1855080	641	1619750	641
											642	2958290	642	3500450	642	3883280	642	4042370	642	3795330	642	4017800	642	4327750	642	3623470		642	2354910	642	2088300	642	1814250	642	1856550	642	1979250	642	1937050	642	1774880		642	2632620	642	1852820	642	1615490	642
											643	2945480	643	3466830	643	3869540	643	4025700	643	3778010	643	4001620	643	4316060	643	3617660		643	2350670	643	2087410	643	1802560	643	1857270	643	1984940	643	1947980	643	1764770		643	2624360	643	1860180	643	1614670	643
											644	2919470	644	3464500	644	3851150	644	3993920	644	3770480	644	3987900	644	4314690	644	3605120		644	2337450	644	2092830	644	1790740	644	1860040	644	1976000	644	1947290	644	1761170		644	2633090	644	1844590	644	1612020	644
											645	2900030	645	3438670	645	3821460	645	3993320	645	3758870	645	3979780	645	4287900	645	3596760		645	2333660	645	2075140	645	1788670	645	1850150	645	1973550	645	1935980	645	1760350		645	2618940	645	1853080	645	1607390	645
											646	2875860	646	3419430	646	3807310	646	3966640	646	3739520	646	3963710	646	4271290	646	3583500		646	2330740	646	2075310	646	1792040	646	1839730	646	1970550	646	1934750	646	1753230		646	2609350	646	1847910	646	1613330	646
											647	2862850	647	3399360	647	3784150	647	3940560	647	3730070	647	3957400	647	4257050	647	3581170		647	2311560	647	2072760	647	1784160	647	1827070	647	1966860	647	1928550	647	1750580		647	2604790	647	1840520	647	1603380	647
											648	2838320	648	3382990	648	3771410	648	3915370	648	3711690	648	3941830	648	4229850	648	3558830		648	2305230	648	2068080	648	1777050	648	1837580	648	1960330	648	1927270	648	1753160		648	2592740	648	1831490	648	1596290	648
											649	2814470	649	3357210	649	3748350	649	3903760	649	3685040	649	3920390	649	4221890	649	3543550		649	2297050	649	2058740	649	1780380	649	1830890	649	1948400	649	1919600	649	1752440		649	2589230	649	1826650	649	1588960	649
											650	2789180	650	3342830	650	3718950	650	3884790	650	3666510	650	3895320	650	4213570	650	3540430		650	2292400	650	2048620	650	1771130	650	1821440	650	1948860	650	1916540	650	1740410		650	2581070	650	1829470	650	1590040	650
											651	2768260	651	3313430	651	3702300	651	3846950	651	3634020	651	3890840	651	4191670	651	3515690		651	2280320	651	2032470	651	1762100	651	1820390	651	1935420	651	1907360	651	1737610		651	2569670	651	1812470	651	1581150	651
											652	2739340	652	3288840	652	3673010	652	3826520	652	3628500	652	3871180	652	4155170	652	3503380		652	2269430	652	2032890	652	1757670	652	1806570	652	1932470	652	1897460	652	1728340		652	2557590	652	1808980	652	1577730	652
											653	2716470	653	3266310	653	3652280	653	3787300	653	3604910	653	3834750	653	4138080	653	3486610		653	2250530	653	2012270	653	1744510	653	1803510	653	1930400	653	1897550	653	1719790		653	2545320	653	1805690	653	1575940	653
											654	2693120	654	3238230	654	3628690	654	3761710	654	3574600	654	3827040	654	4118680	654	3474440		654	2245600	654	2003380	654	1738390	654	1795420	654	1916220	654	1893930	654	1721380		654	2531650	654	1801160	654	1566320	654
											655	2665620	655	3209560	655	3597900	655	3736130	655	3551300	655	3798930	655	4083380	655	3438570		655	2228110	655	2008550	655	1731630	655	1782610	655	1915760	655	1880220	655	1709720		655	2507780	655	1790260	655	1568990	655
											656	2636360	656	3185630	656	3570430	656	3706980	656	3537420	656	3775650	656	4059610	656	3419360		656	2211040	656	1989550	656	1717780	656	1780820	656	1894790	656	1877110	656	1697530		656	2501120	656	1779860	656	1552580	656
											657	2613790	657	3170350	657	3544280	657	3674030	657	3499900	657	3749750	657	4030860	657	3397700		657	2199030	657	1975270	657	1717170	657	1765230	657	1886010	657	1860810	657	1695030		657	2487810	657	1776010	657	1551250	657
											658	2588180	658	3132570	658	3521420	658	3649140	658	3475490	658	3729460	658	4017550	658	3379750		658	2178990	658	1960080	658	1702820	658	1756110	658	1878800	658	1854990	658	1689940		658	2481790	658	1758970	658	1544360	658
											659	2548720	659	3098650	659	3491190	659	3616570	659	3450280	659	3696840	659	3983940	659	3352950		659	2165810	659	1948090	659	1692800	659	1753500	659	1875450	659	1842750	659	1670410		659	2452390	659	1757120	659	1537290	659
											660	2530500	660	3072150	660	3444580	660	3579910	660	3420040	660	3675910	660	3945420	660	3334170		660	2139980	660	1936880	660	1684910	660	1739750	660	1851400	660	1833640	660	1669390		660	2443440	660	1737990	660	1521270	660
											661	2498250	661	3042430	661	3426290	661	3553860	661	3394770	661	3651950	661	3914690	661	3301650		661	2136780	661	1925480	661	1669360	661	1731250	661	1844020	661	1827390	661	1655050		661	2425970	661	1731870	661	1517710	661
											662	2477770	662	3008240	662	3394310	662	3518620	662	3368780	662	3622460	662	3877530	662	3287690		662	2110740	662	1918080	662	1659200	662	1712410	662	1833220	662	1816330	662	1648020		662	2398500	662	1722270	662	1504280	662
											663	2446990	663	2985260	663	3363030	663	3484480	663	3335530	663	3586990	663	3845510	663	3258330		663	2107500	663	1897210	663	1647960	663	1700420	663	1819710	663	1800720	663	1634800		663	2394100	663	1708610	663	1497430	663
											664	2410940	664	2959650	664	3329960	664	3456500	664	3307610	664	3560940	664	3818010	664	3233670		664	2074860	664	1881500	664	1633220	664	1692090	664	1806910	664	1786130	664	1629520		664	2371520	664	1695890	664	1486300	664
											665	2393360	665	2926540	665	3305520	665	3408990	665	3274430	665	3534340	665	3785400	665	3202310		665	2057160	665	1859860	665	1616920	665	1680750	665	1801080	665	1777140	665	1623850		665	2356590	665	1685150	665	1464350	665
											666	2354880	666	2884830	666	3259170	666	3383470	666	3244870	666	3503770	666	3747000	666	3181330		666	2039250	666	1845140	666	1609380	666	1668900	666	1781940	666	1765370	666	1607680		666	2335700	666	1668020	666	1468540	666
											667	2326750	667	2864510	667	3235910	667	3347020	667	3214350	667	3466620	667	3728580	667	3153250		667	2029780	667	1837310	667	1587880	667	1657320	667	1763930	667	1750300	667	1590820		667	2312170	667	1664000	667	1458350	667
											668	2296890	668	2833000	668	3200690	668	3309430	668	3184970	668	3440240	668	3688010	668	3118480		668	2003980	668	1821970	668	1588120	668	1639020	668	1748940	668	1738480	668	1582280		668	2285630	668	1646840	668	1443700	668
											669	2274310	669	2786830	669	3165990	669	3283080	669	3142840	669	3400700	669	3653790	669	3092960		669	1983070	669	1805390	669	1572650	669	1623510	669	1740060	669	1721290	669	1577870		669	2269540	669	1638990	669	1430890	669
											670	2231180	670	2756750	670	3123890	670	3247960	670	3118000	670	3371040	670	3625790	670	3064990		670	1970460	670	1790720	670	1561740	670	1611460	670	1723140	670	1706450	670	1560240		670	2254560	670	1627690	670	1414870	670
											671	2199300	671	2732170	671	3087870	671	3202940	671	3085250	671	3343140	671	3574260	671	3036250		671	1945770	671	1772250	671	1541950	671	1597460	671	1704380	671	1687780	671	1536550		671	2226770	671	1603360	671	1409340	671
											672	2174340	672	2705910	672	3046000	672	3173860	672	3048030	672	3304360	672	3540330	672	2999110		672	1922500	672	1754380	672	1525020	672	1588730	672	1690370	672	1686240	672	1528450		672	2212760	672	1597660	672	1397830	672
											673	2144930	673	2664390	673	3013230	673	3122730	673	3020160	673	3259990	673	3502020	673	2974170		673	1901190	673	1726530	673	1515570	673	1568210	673	1674760	673	1665350	673	1516570		673	2190070	673	1579310	673	1379080	673
											674	2109360	674	2621830	674	2982150	674	3096300	674	2978960	674	3223860	674	3448550	674	2928100		674	1879220	674	1713230	674	1495520	674	1552360	674	1658190	674	1652930	674	1503320		674	2164230	674	1564740	674	1366430	674
											675	2078810	675	2584630	675	2947740	675	3054550	675	2937700	675	3193690	675	3423070	675	2907580		675	1861460	675	1696300	675	1473730	675	1536010	675	1640870	675	1628820	675	1481010		675	2134580	675	1547240	675	1353880	675
											676	2057110	676	2556880	676	2896090	676	2996860	676	2910070	676	3150040	676	3367590	676	2873750		676	1835150	676	1679910	676	1451620	676	1511830	676	1625200	676	1607670	676	1468410		676	2114250	676	1528860	676	1336420	676
											677	2007010	677	2516460	677	2861240	677	2968290	677	2863110	677	3108510	677	3326450	677	2818740		677	1808850	677	1661750	677	1440240	677	1499990	677	1602940	677	1592620	677	1454070		677	2076100	677	1514940	677	1323800	677
											678	1975370	678	2475790	678	2814800	678	2924650	678	2818890	678	3067480	678	3280740	678	2784140		678	1781490	678	1637510	678	1429530	678	1476480	678	1577080	678	1578460	678	1440840		678	2069120	678	1484600	678	1312650	678
											679	1950030	679	2442860	679	2778160	679	2893340	679	2789030	679	3025250	679	3243060	679	2767190		679	1766280	679	1617010	679	1412000	679	1459590	679	1570320	679	1565130	679	1422770		679	2039840	679	1472270	679	1293300	679
											680	1916500	680	2409380	680	2742750	680	2848500	680	2747220	680	2987290	680	3215090	680	2725820		680	1743410	680	1593550	680	1396340	680	1454580	680	1547780	680	1541000	680	1403960		680	2022860	680	1463350	680	1283870	680
											681	1887330	681	2375020	681	2712900	681	2817680	681	2713510	681	2961600	681	3175800	681	2705380		681	1727120	681	1585340	681	1380890	681	1439590	681	1540550	681	1534090	681	1390020		681	1995090	681	1454990	681	1268460	681
											682	1878720	682	2344550	682	2686350	682	2790740	682	2685610	682	2928630	682	3142940	682	2685450		682	1715830	682	1568180	682	1368860	682	1420400	682	1524980	682	1511150	682	1386960		682	1978980	682	1434570	682	1265540	682
											683	1846120	683	2331210	683	2651820	683	2762610	683	2667300	683	2910500	683	3119810	683	2660760		683	1696930	683	1558470	683	1369120	683	1414290	683	1509980	683	1503260	683	1369570		683	1966090	683	1423770	683	1257740	683
											684	1827780	684	2301660	684	2628590	684	2746870	684	2640740	684	2887900	684	3088420	684	2644890		684	1681440	684	1546700	684	1358680	684	1409360	684	1505970	684	1498500	684	1370250		684	1949670	684	1421570	684	1249860	684
											685	1809490	685	2292170	685	2611410	685	2720130	685	2623010	685	2868230	685	3074400	685	2616440		685	1670200	685	1542870	685	1344440	685	1403670	685	1499870	685	1493430	685	1359920		685	1944730	685	1407930	685	1248260	685
											686	1795790	686	2273070	686	2595910	686	2701830	686	2619980	686	2857990	686	3053290	686	2602850		686	1659780	686	1525650	686	1340820	686	1393760	686	1497920	686	1485870	686	1359360		686	1933450	686	1410350	686	1231460	686
[truncated: 9 more columns]

## Sheet: Fig S1
EAS (9/10/15) synthesis			Fluorescence	5		6		7		8		9		10		11		12		13		14		15		16
VG (2/4/16) analysis				Wavelength (nm)	CPS	Wavelength (nm)	CPS	Wavelength (nm)	CPS	Wavelength (nm)	CPS	Wavelength (nm)	CPS	Wavelength (nm)	CPS	Wavelength (nm)	CPS	Wavelength (nm)	CPS	Wavelength (nm)	CPS	Wavelength (nm)	CPS	Wavelength (nm)	CPS	Wavelength (nm)	CPS
				400	3505760	400	2344130	400	5723780	400	5263080	400	4995850	400	4364490	400	4345930	400	7027430	400	6205420	400	2129390	400	4840440	400	14920500
Time: 25 minutes	fluor			401	2615710	401	1748200	401	4394720	401	4015400	401	3811280	401	3305990	401	3292330	401	5463650	401	4803120	401	1594850	401	3686660	401	13008200
Aliquot Number	λmax (nm)			402	1764410	402	1169860	402	3034010	402	2756400	402	2612660	402	2253830	402	2250610	402	3813930	402	3340020	402	1070470	402	2525390	402	10275900
5	652.106			403	1074160	403	702470	403	1852420	403	1684880	403	1588740	403	1372560	403	1369940	403	2361360	403	2076130	403	647150	403	1539230	403	7089210
6	650.4			404	551900	404	359500	404	960960	404	873100	404	821670	404	704110	404	705780	404	1228870	404	1078840	404	332710	404	802860	404	4027350
7	646.47			405	251900	405	167980	405	442990	405	396140	405	378580	405	324110	405	321290	405	565660	405	501270	405	150960	405	365060	405	1937660
8	643.796			406	98480	406	66140	406	167320	406	149950	406	141180	406	119960	406	121020	406	216130	406	187340	406	57300	406	137360	406	732240
9	642.7			407	37440	407	26110	407	58440	407	51100	407	49010	407	41000	407	41740	407	72540	407	60350	407	18580	407	45080	407	232320
10	642.09			408	23710	408	16830	408	35730	408	31230	408	28490	408	24120	408	24830	408	43560	408	33350	408	10240	408	25360	408	122310
11	641.179			409	22190	409	15930	409	30060	409	26320	409	25850	409	21310	409	21110	409	35270	409	28430	409	8850	409	21850	409	100170
12	640.45			410	20770	410	14340	410	28290	410	25780	410	24160	410	19170	410	19120	410	34860	410	26970	410	8320	410	20730	410	86450
13	639.674			411	20870	411	14460	411	27070	411	24780	411	22510	411	19670	411	19220	411	31500	411	24580	411	8510	411	19340	411	79160
14	638.62			412	20430	412	14830	412	27160	412	24160	412	22580	412	19450	412	19880	412	31490	412	23160	412	7470	412	18620	412	72230
15	638.75			413	20460	413	15030	413	27210	413	24200	413	22610	413	19610	413	19260	413	31950	413	23030	413	7250	413	18780	413	67890
16	638.36			414	20980	414	14940	414	28540	414	24700	414	24230	414	19240	414	19920	414	32320	414	22400	414	8100	414	18600	414	63680
				415	21100	415	15420	415	28420	415	26380	415	24500	415	20610	415	20030	415	32700	415	22620	415	7770	415	19440	415	61380
				416	22850	416	15430	416	30160	416	26970	416	26120	416	21610	416	19810	416	34960	416	23270	416	7590	416	19710	416	55640
Time: 25 minutes	UV-vis			417	23380	417	15720	417	31320	417	27560	417	25930	417	21140	417	21920	417	35500	417	23640	417	8590	417	20170	417	54650
Aliquot Number	λmax (nm)			418	24020	418	16440	418	32980	418	29530	418	27740	418	22230	418	22690	418	36060	418	23960	418	8760	418	20840	418	51790
5	487			419	25350	419	17740	419	33450	419	30480	419	29050	419	23990	419	22220	419	37460	419	25390	419	8610	419	22200	419	49890
6	485			420	25920	420	18480	420	34520	420	30950	420	30590	420	23690	420	24620	420	41070	420	26220	420	9090	420	22690	420	48500
7	483			421	27640	421	19000	421	35440	421	32560	421	31230	421	25630	421	25440	421	42410	421	26120	421	8650	421	23770	421	47460
8	477			422	28730	422	19230	422	36920	422	33350	422	32840	422	26320	422	25400	422	41840	422	26810	422	9200	422	23220	422	47050
9	475			423	28050	423	19990	423	38190	423	34950	423	33680	423	27050	423	26690	423	44170	423	27850	423	10220	423	24900	423	46300
10	474			424	28870	424	19510	424	39530	424	35870	424	34310	424	28490	424	27980	424	45630	424	28360	424	10000	424	25580	424	46270
11	474			425	30660	425	20730	425	40460	425	36110	425	35270	425	28780	425	28530	425	45630	425	30660	425	9890	425	26260	425	46490
12	474			426	30800	426	21680	426	41040	426	38790	426	35680	426	28810	426	29900	426	46630	426	30270	426	10110	426	27250	426	45490
13	468			427	31880	427	21680	427	42380	427	37870	427	36020	427	31620	427	29170	427	47490	427	31220	427	10790	427	28040	427	44990
14	467			428	31650	428	21560	428	43540	428	38460	428	38920	428	30010	428	30710	428	49180	428	30320	428	11830	428	27030	428	44660
15	464			429	32640	429	22560	429	43170	429	39200	429	38690	429	30520	429	31780	429	50070	429	31730	429	11610	429	28810	429	47020
16	464			430	31550	430	22250	430	44740	430	42160	430	39890	430	32180	430	31690	430	52700	430	31700	430	11810	430	29480	430	47220
				431	31660	431	23230	431	44880	431	41740	431	41000	431	32610	431	32860	431	51980	431	31700	431	12720	431	29700	431	47520
				432	32640	432	23810	432	46190	432	43210	432	41930	432	33710	432	33720	432	54320	432	32360	432	12350	432	31280	432	49120
				433	34360	433	24040	433	47880	433	44020	433	41290	433	35470	433	35160	433	54170	433	33910	433	12330	433	30750	433	51040
				434	34470	434	25060	434	47880	434	44910	434	42760	434	36090	434	36270	434	57730	434	35560	434	13370	434	31980	434	52140
				435	36090	435	25730	435	49520	435	46610	435	45480	435	38270	435	37720	435	58370	435	36700	435	14080	435	34100	435	54280
				436	37970	436	27690	436	53850	436	50160	436	48120	436	39610	436	39860	436	63870	436	38610	436	14710	436	35320	436	56380
				437	41660	437	28990	437	55310	437	54480	437	51560	437	42690	437	42690	437	65210	437	40980	437	16100	437	38310	437	56290
				438	44700	438	31310	438	61650	438	58310	438	56020	438	46420	438	45550	438	70030	438	42870	438	16560	438	40930	438	59620
				439	46550	439	34980	439	66930	439	62850	439	61920	439	50980	439	48810	439	76140	439	46320	439	18220	439	42420	439	62380
				440	50740	440	35010	440	71540	440	67200	440	64110	440	51740	440	52770	440	82210	440	49170	440	19390	440	46600	440	65910
				441	53570	441	38270	441	76850	441	69830	441	69190	441	55390	441	56970	441	86810	441	51470	441	20840	441	48920	441	66570
				442	58030	442	39300	442	79820	442	72660	442	73440	442	58950	442	59580	442	89390	442	56440	442	21460	442	50080	442	69880
				443	60540	443	40900	443	84660	443	78520	443	75260	443	60960	443	61130	443	94740	443	58220	443	22460	443	53770	443	70210
				444	59890	444	42900	444	84470	444	77400	444	75800	444	62520	444	63410	444	96440	444	57440	444	22450	444	54010	444	71670
				445	58440	445	42080	445	84890	445	79760	445	76320	445	62090	445	63010	445	98600	445	60100	445	23170	445	54740	445	70290
				446	58200	446	41000	446	81560	446	77680	446	74270	446	62670	446	62790	446	94980	446	57940	446	23720	446	54410	446	68880
				447	57000	447	40080	447	80780	447	75000	447	71300	447	62270	447	61020	447	91290	447	56990	447	22620	447	52600	447	68220
				448	55090	448	38780	448	75950	448	71720	448	70870	448	60020	448	58080	448	86430	448	55240	448	22620	448	52380	448	65560
				449	51480	449	37000	449	72790	449	67350	449	66740	449	56880	449	55070	449	83670	449	53590	449	22220	449	50830	449	64950
				450	50110	450	35430	450	66580	450	64990	450	62830	450	53380	450	52250	450	80650	450	52470	450	22140	450	49100	450	60920
				451	47160	451	35280	451	62890	451	60930	451	58540	451	50840	451	50380	451	76470	451	49370	451	21080	451	46880	451	61680
				452	45080	452	32600	452	60450	452	56560	452	57020	452	51200	452	48000	452	73590	452	45680	452	19260	452	47220	452	58590
				453	45460	453	32300	453	58570	453	56230	453	53700	453	49280	453	46610	453	71120	453	46450	453	20560	453	45030	453	59420
				454	43110	454	31790	454	55610	454	54440	454	52990	454	46890	454	46440	454	68510	454	45950	454	19920	454	44540	454	59810
				455	43510	455	31080	455	54320	455	52990	455	50860	455	45970	455	45490	455	67320	455	45800	455	21080	455	44230	455	58340
				456	43560	456	32280	456	53110	456	53710	456	50110	456	45320	456	44390	456	67060	456	44870	456	20720	456	45040	456	58480
				457	44520	457	31410	457	52960	457	52630	457	50530	457	44790	457	45890	457	66730	457	46020	457	21190	457	46160	457	58270
				458	46200	458	32220	458	52230	458	51740	458	50500	458	44300	458	45980	458	66240	458	45990	458	20290	458	44050	458	58280
				459	47330	459	30880	459	52620	459	50870	459	50410	459	45440	459	45820	459	68470	459	46270	459	22010	459	46430	459	58410
				460	47230	460	31540	460	51450	460	52570	460	52410	460	46480	460	44830	460	67500	460	48230	460	20980	460	46830	460	58790
				461	50310	461	31450	461	52160	461	50890	461	51520	461	46570	461	44880	461	67480	461	47100	461	21180	461	45590	461	59680
				462	50370	462	31920	462	51650	462	52000	462	51920	462	46750	462	45700	462	68540	462	47500	462	22240	462	46140	462	60250
				463	51880	463	33300	463	51540	463	52060	463	52410	463	47420	463	45450	463	66990	463	46940	463	23250	463	48980	463	61390
				464	55380	464	33070	464	53170	464	51640	464	52720	464	47180	464	45810	464	67300	464	47640	464	22400	464	47860	464	62810
				465	56620	465	34860	465	52350	465	53470	465	51600	465	47410	465	45390	465	66960	465	49470	465	23690	465	48080	465	61720
				466	56740	466	34790	466	52290	466	53490	466	52940	466	48400	466	47130	466	69220	466	48270	466	23560	466	48620	466	61240
				467	59470	467	35100	467	52570	467	54400	467	52110	467	48460	467	47970	467	68540	467	49280	467	23730	467	49400	467	62570
				468	62000	468	36430	468	52820	468	54720	468	53050	468	50080	468	47800	468	70420	468	50160	468	23930	468	49360	468	64010
				469	64500	469	35460	469	54400	469	54890	469	52390	469	49520	469	47980	469	69260	469	48580	469	23730	469	51400	469	64240
				470	67020	470	37370	470	53900	470	54150	470	52770	470	50740	470	49030	470	71300	470	48210	470	25310	470	50600	470	66000
				471	68040	471	36760	471	53790	471	54070	471	55040	471	49360	471	48080	471	70020	471	49780	471	24770	471	50740	471	66350
				472	71150	472	37500	472	54310	472	55520	472	54110	472	49990	472	48540	472	72540	472	50530	472	24910	472	51340	472	65170
				473	73240	473	37770	473	54080	473	56070	473	54220	473	52350	473	48410	473	70360	473	50260	473	25720	473	51940	473	67780
				474	75270	474	39010	474	54200	474	55470	474	54890	474	51820	474	49680	474	69840	474	52240	474	25150	474	53080	474	68250
				475	78160	475	39200	475	55440	475	55390	475	55250	475	53310	475	50700	475	71570	475	51380	475	26740	475	53380	475	70900
				476	81200	476	40230	476	55630	476	57500	476	55460	476	52370	476	51910	476	71800	476	53220	476	25970	476	52560	476	71040
				477	83010	477	42770	477	56110	477	58600	477	55870	477	56820	477	50970	477	71060	477	51870	477	27170	477	52960	477	74070
				478	86650	478	42460	478	56510	478	56950	478	56500	478	58820	478	51460	478	72880	478	53320	478	28200	478	55240	478	75740
				479	90260	479	42780	479	58570	479	59110	479	58820	479	62480	479	51030	479	73360	479	53320	479	28000	479	55100	479	78190
				480	94770	480	44280	480	58110	480	59030	480	57270	480	65410	480	50780	480	74590	480	51650	480	27220	480	54220	480	78820
				481	99640	481	45820	481	59760	481	60430	481	57490	481	67960	481	52380	481	73690	481	53980	481	28370	481	55100	481	83400
				482	103940	482	47260	482	59830	482	60610	482	59110	482	71470	482	53030	482	73900	482	52200	482	28330	482	56240	482	86040
				483	108640	483	48930	483	60220	483	59990	483	61520	483	67480	483	52430	483	75380	483	54370	483	28890	483	55590	483	89800
				484	113780	484	51120	484	60260	484	61920	484	59900	484	64690	484	53200	484	74870	484	54820	484	29040	484	55560	484	91270
				485	117310	485	51710	485	61720	485	63350	485	61280	485	63350	485	54650	485	78020	485	56200	485	29570	485	55170	485	93570
				486	121160	486	53440	486	63830	486	63380	486	62960	486	61440	486	54320	486	74810	486	55180	486	29660	486	57860	486	98330
				487	128040	487	56410	487	63670	487	64320	487	63230	487	59990	487	54020	487	74630	487	56080	487	30520	487	57190	487	99070
				488	134460	488	59580	488	67420	488	63220	488	64370	488	62670	488	56280	488	77770	488	56480	488	30560	488	56610	488	105040
				489	141650	489	63130	489	68890	489	66520	489	65730	489	62390	489	57120	489	78510	489	56910	489	29250	489	58740	489	106340
				490	151530	490	64970	490	71150	490	66900	490	66600	490	61450	490	58320	490	78050	490	57200	490	31310	490	57820	490	113470
				491	158380	491	68750	491	72540	491	68930	491	66540	491	62760	491	58770	491	79480	491	56550	491	29570	491	56470	491	118410
				492	167890	492	71680	492	76580	492	70060	492	70280	492	63760	492	59750	492	79730	492	58020	492	31070	492	59290	492	123730
				493	175150	493	76030	493	77460	493	71890	493	72100	493	67190	493	62050	493	81360	493	58590	493	31510	493	58080	493	128420
				494	189880	494	81760	494	81050	494	74720	494	72210	494	64520	494	63070	494	78920	494	59200	494	31270	494	59320	494	133910
				495	203200	495	87860	495	82360	495	75780	495	77170	495	66390	495	63700	495	81420	495	57920	495	30900	495	59230	495	139460
				496	213030	496	94510	496	87240	496	78190	496	76210	496	69490	496	64010	496	82460	496	60310	496	31540	496	58290	496	146830
				497	226960	497	99940	497	89310	497	80440	497	77420	497	69220	497	65290	497	84420	497	61120	497	30400	497	58250	497	153620
				498	245120	498	109050	498	97080	498	84170	498	82560	498	71800	498	66850	498	82410	498	58840	498	31530	498	59660	498	156690
				499	259760	499	118780	499	99800	499	85950	499	83680	499	72250	499	67630	499	85310	499	59170	499	32470	499	59820	499	164060
				500	278230	500	125210	500	103690	500	88570	500	87190	500	73620	500	69720	500	86520	500	60430	500	32310	500	58820	500	169960
				501	296150	501	133140	501	110810	501	93560	501	92060	501	75140	501	70900	501	87090	501	60760	501	33280	501	57990	501	178450
				502	314850	502	142910	502	115710	502	94760	502	90560	502	76200	502	70300	502	89580	502	59340	502	32430	502	57580	502	184390
				503	336320	503	159120	503	121080	503	98900	503	97200	503	78610	503	74140	503	89480	503	61630	503	31100	503	58250	503	193540
				504	363630	504	170280	504	127290	504	101820	504	99760	504	81840	504	75100	504	89930	504	60540	504	31390	504	59490	504	200590
				505	389920	505	186630	505	136970	505	106400	505	104990	505	82840	505	76700	505	91450	505	62660	505	32030	505	59920	505	206920
				506	419400	506	200790	506	145630	506	112260	506	109100	506	84390	506	80880	506	90830	506	60570	506	32490	506	58110	506	213340
				507	447930	507	216430	507	153520	507	115780	507	112720	507	88670	507	82070	507	93210	507	62060	507	33550	507	58430	507	224640
				508	481670	508	238570	508	161420	508	117990	508	117600	508	88250	508	83950	508	97470	508	63900	508	33420	508	58780	508	229850
				509	515840	509	257960	509	172860	509	125140	509	125260	509	91920	509	87730	509	99810	509	64750	509	33110	509	60210	509	242320
				510	552840	510	281610	510	181100	510	129700	510	130110	510	94040	510	89870	510	100100	510	63300	510	34230	510	59080	510	248810
				511	592680	511	304700	511	193380	511	137010	511	135050	511	99420	511	93560	511	103010	511	65180	511	32960	511	60230	511	258350
				512	636230	512	333950	512	209110	512	144810	512	141420	512	102350	512	95500	512	105540	512	66490	512	33950	512	59860	512	266830
				513	677820	513	363390	513	222480	513	150560	513	148040	513	106180	513	97490	513	107600	513	66560	513	34430	513	60200	513	272850
				514	725120	514	390110	514	233560	514	155890	514	152560	514	106680	514	102690	514	108110	514	67150	514	35180	514	59740	514	275740
				515	772460	515	427650	515	249070	515	165160	515	163990	515	111750	515	106130	515	112340	515	66180	515	33580	515	59310	515	286190
				516	831460	516	462190	516	265930	516	175280	516	173750	516	115870	516	110940	516	114210	516	69080	516	35650	516	59360	516	289670
				517	887440	517	499400	517	282880	517	179190	517	180030	517	121440	517	114020	517	117570	517	68680	517	34820	517	59980	517	294750
				518	934260	518	539860	518	301670	518	188120	518	188170	518	123400	518	118760	518	118210	518	70310	518	35880	518	60200	518	295920
				519	998510	519	582110	519	318590	519	199620	519	197750	519	127980	519	123260	519	122320	519	71700	519	36480	519	62040	519	300350
				520	1067770	520	638670	520	341710	520	211780	520	208820	520	133160	520	129090	520	126600	520	72530	520	37290	520	61500	520	303270
				521	1123790	521	682890	521	363780	521	222260	521	217760	521	139550	521	131780	521	130390	521	75570	521	37200	521	61720	521	306230
				522	1201450	522	733920	522	384290	522	233700	522	229490	522	143680	522	139070	522	136660	522	75790	522	37830	522	63420	522	310860
				523	1267960	523	799020	523	412150	523	243650	523	243600	523	153710	523	147580	523	138560	523	77350	523	40440	523	64110	523	314460
				524	1347920	524	864660	524	438140	524	257410	524	256230	524	157200	524	151050	524	144140	524	78090	524	38840	524	63020	524	319720
				525	1416850	525	921510	525	463630	525	270610	525	267290	525	165510	525	156330	525	146520	525	81480	525	41290	525	63970	525	324350
				526	1504820	526	989970	526	497390	526	286140	526	284210	526	173120	526	166780	526	152210	526	85140	526	41370	526	66510	526	328280
				527	1587400	527	1064920	527	524280	527	301470	527	302220	527	181940	527	174060	527	160470	527	84810	527	43960	527	66840	527	335370
				528	1674890	528	1144150	528	560910	528	313720	528	314250	528	195910	528	183660	528	166050	528	89130	528	44250	528	68470	528	338860
				529	1752760	529	1223210	529	592990	529	335940	529	333770	529	203640	529	192090	529	169560	529	88840	529	44670	529	70460	529	343830
				530	1848110	530	1309220	530	632970	530	349900	530	356690	530	220810	530	199910	530	178610	530	95240	530	44840	530	72520	530	345010
				531	1947080	531	1398210	531	673210	531	371770	531	370150	531	229070	531	210600	531	185250	531	98210	531	47130	531	73490	531	347360
				532	2042620	532	1486740	532	709420	532	393480	532	396280	532	244090	532	221820	532	194300	532	99900	532	49730	532	73610	532	350390
				533	2139630	533	1583800	533	755590	533	414530	533	418220	533	256700	533	233420	533	200840	533	103490	533	49180	533	76390	533	351280
				534	2244170	534	1689190	534	801460	534	434990	534	444750	534	266050	534	241800	534	212160	534	107650	534	51140	534	79450	534	355240
				535	2336820	535	1784860	535	855640	535	463410	535	466780	535	279230	535	257020	535	217940	535	110670	535	54160	535	79600	535	359200
				536	2447920	536	1890860	536	900120	536	489450	536	490620	536	295170	536	272720	536	232220	536	115540	536	55770	536	80260	536	361950
				537	2550380	537	2001450	537	947830	537	514490	537	522340	537	303870	537	286730	537	236330	537	119260	537	55770	537	83050	537	364660
				538	2646420	538	2107180	538	1000820	538	544350	538	553130	538	322260	538	296250	538	248530	538	123630	538	59640	538	85780	538	369330
				539	2753460	539	2212580	539	1059050	539	566650	539	585860	539	335410	539	314340	539	255700	539	128930	539	61430	539	88870	539	371820
				540	2863250	540	2334330	540	1115880	540	599690	540	618710	540	352290	540	332250	540	272940	540	132080	540	65620	540	90020	540	372040
				541	2978870	541	2451770	541	1177270	541	635750	541	650090	541	368620	541	348960	541	284760	541	138400	541	65880	541	94290	541	377190
				542	3080030	542	2571540	542	1242760	542	668500	542	687640	542	387250	542	371380	542	296060	542	143290	542	69360	542	94810	542	379630
				543	3184730	543	2697420	543	1298380	543	700170	543	722650	543	406620	543	387660	543	310640	543	149640	543	69750	543	99720	543	380850
				544	3296890	544	2813930	544	1367930	544	739810	544	761040	544	426040	544	403130	544	322480	544	155220	544	75050	544	99600	544	383090
				545	3401310	545	2937960	545	1447890	545	776990	545	804870	545	451290	545	433800	545	339520	545	161540	545	75160	545	102930	545	387470
				546	3523090	546	3051180	546	1519490	546	824890	546	844500	546	468650	546	451050	546	354880	546	171160	546	79220	546	105150	546	386200
				547	3628770	547	3175440	547	1590590	547	858250	547	890460	547	492190	547	476410	547	369820	547	172940	547	83520	547	108600	547	386940
				548	3727530	548	3295470	548	1657760	548	903400	548	937910	548	518340	548	502360	548	386720	548	185020	548	85990	548	110990	548	394390
				549	3829930	549	3426970	549	1737980	549	955060	549	987290	549	544370	549	529540	549	406440	549	193990	549	90710	549	119100	549	392410
				550	3928540	550	3534740	550	1808430	550	991500	550	1034470	550	570720	550	551370	550	423920	550	199070	550	93720	550	118990	550	398900
				551	4041660	551	3654000	551	1886360	551	1039570	551	1085420	551	597090	551	582170	551	443930	551	208520	551	96430	551	123020	551	400620
				552	4139160	552	3782970	552	1966730	552	1087930	552	1131320	552	629850	552	612030	552	460670	552	214840	552	100840	552	126360	552	398090
				553	4226770	553	3890520	553	2053240	553	1139320	553	1192160	553	657960	553	640850	553	485630	553	225760	553	107010	553	131910	553	404550
				554	4331990	554	4010350	554	2128270	554	1186930	554	1236620	554	687980	554	675570	554	504210	554	235300	554	110330	554	133380	554	399140
				555	4426710	555	4104990	555	2204310	555	1231720	555	1287250	555	721970	555	703010	555	524570	555	243460	555	113860	555	139900	555	407560
				556	4501810	556	4212550	556	2287070	556	1282680	556	1349040	556	750970	556	733830	556	553800	556	254380	556	119290	556	144270	556	408190
				557	4602530	557	4321400	557	2365210	557	1343240	557	1402530	557	781800	557	768450	557	571040	557	267430	557	123870	557	150880	557	408640
				558	4684020	558	4429340	558	2438770	558	1390460	558	1455750	558	823500	558	797470	558	588270	558	274460	558	130560	558	154240	558	412800
				559	4780850	559	4537460	559	2527740	559	1439500	559	1520380	559	855960	559	833230	559	618450	559	285160	559	136950	559	158690	559	414620
				560	4863320	560	4621500	560	2600500	560	1491820	560	1576360	560	891630	560	870080	560	641860	560	298600	560	141050	560	164520	560	411300
				561	4940290	561	4730770	561	2671170	561	1548780	561	1639570	561	934240	561	912110	561	667950	561	311140	561	146500	561	167740	561	416700
				562	5022150	562	4811180	562	2753560	562	1602170	562	1693210	562	967940	562	941010	562	694360	562	321450	562	154020	562	175470	562	417500
				563	5096600	563	4906870	563	2822120	563	1661420	563	1756240	563	1003090	563	972080	563	726630	563	336450	563	156800	563	182430	563	419940
				564	5177720	564	5014000	564	2907140	564	1711980	564	1818330	564	1043170	564	1013400	564	746580	564	347070	564	165530	564	186890	564	415760
				565	5240480	565	5096990	565	2968470	565	1755490	565	1869520	565	1081990	565	1050340	565	775880	565	363970	565	172890	565	194980	565	422480
				566	5315710	566	5160850	566	3046750	566	1809940	566	1925930	566	1119590	566	1090820	566	808790	566	376130	566	180640	566	201710	566	424710
				567	5386220	567	5256150	567	3121280	567	1874940	567	1993610	567	1162830	567	1130530	567	830290	567	389200	567	187690	567	207230	567	427430
				568	5462660	568	5336300	568	3198340	568	1925260	568	2048030	568	1199620	568	1171280	568	859910	568	404610	568	200220	568	217710	568	422480
				569	5519250	569	5406780	569	3267400	569	1971190	569	2101010	569	1240760	569	1210150	569	887110	569	422240	569	205130	569	221390	569	422710
				570	5596950	570	5499440	570	3334590	570	2022390	570	2164030	570	1285740	570	1249400	570	913920	570	440320	570	210560	570	230300	570	420100
				571	5653120	571	5572530	571	3401940	571	2074880	571	2216280	571	1319830	571	1289500	571	946830	571	453300	571	221110	571	238060	571	427930
				572	5721050	572	5638700	572	3473350	572	2122960	572	2280570	572	1355810	572	1329600	572	979930	572	471080	572	231420	572	246610	572	429400
				573	5781570	573	5709280	573	3534440	573	2189700	573	2331680	573	1401800	573	1370240	573	1008170	573	484700	573	237090	573	255080	573	428760
				574	5835510	574	5783210	574	3601110	574	2232030	574	2400320	574	1439710	574	1410150	574	1043810	574	504040	574	245780	574	263030	574	426740
				575	5899600	575	5850550	575	3662460	575	2288480	575	2444820	575	1481200	575	1450730	575	1073870	575	519480	575	256680	575	271680	575	430960
				576	5958770	576	5908920	576	3716360	576	2330160	576	2509200	576	1527330	576	1480440	576	1098620	576	538030	576	265020	576	277380	576	431330
				577	6015380	577	5974270	577	3775330	577	2380380	577	2554790	577	1559430	577	1519680	577	1134210	577	554700	577	274610	577	287120	577	431790
				578	6061740	578	6033750	578	3842830	578	2425350	578	2610040	578	1608980	578	1556000	578	1159200	578	577710	578	286780	578	297560	578	434770
				579	6123070	579	6094670	579	3893450	579	2471160	579	2659820	579	1638830	579	1590240	579	1191070	579	592800	579	296710	579	310460	579	432840
				580	6156180	580	6161860	580	3948930	580	2520830	580	2711000	580	1691040	580	1637160	580	1225130	580	609360	580	311170	580	318510	580	432260
				581	6218670	581	6211880	581	4013630	581	2558320	581	2763450	581	1742820	581	1667620	581	1255180	581	630750	581	320050	581	327980	581	427530
				582	6264720	582	6265150	582	4055010	582	2608100	582	2812470	582	1800760	582	1716030	582	1286150	582	652410	582	332680	582	338240	582	428170
				583	6314610	583	6305070	583	4119770	583	2650040	583	2854130	583	1867870	583	1753590	583	1312670	583	670250	583	344810	583	349550	583	432900
				584	6357320	584	6373160	584	4167030	584	2687560	584	2898500	584	1941210	584	1787850	584	1347380	584	695320	584	354400	584	360860	584	435330
				585	6392230	585	6434480	585	4218860	585	2732020	585	2950910	585	2002030	585	1821240	585	1382080	585	707940	585	368180	585	371530	585	435190
				586	6433560	586	6484220	586	4264220	586	2776980	586	2994550	586	2069480	586	1855490	586	1404320	586	724860	586	380830	586	379530	586	434260
				587	6483230	587	6531660	587	4331940	587	2823450	587	3033240	587	2138350	587	1894950	587	1431970	587	745430	587	394700	587	389410	587	434910
				588	6527090	588	6571820	588	4372450	588	2854150	588	3083900	588	2193020	588	1930280	588	1463830	588	768020	588	403680	588	401500	588	432970
				589	6559750	589	6628550	589	4411710	589	2906370	589	3129190	589	2247130	589	1958700	589	1491120	589	789560	589	416960	589	416660	589	436370
				590	6592860	590	6676880	590	4454720	590	2936620	590	3177960	590	2273900	590	1984830	590	1522090	590	803530	590	428500	590	424090	590	432890
				591	6652080	591	6718480	591	4497420	591	2967400	591	3212170	591	2286790	591	2021310	591	1546520	591	824680	591	444580	591	435140	591	433720
				592	6669730	592	6756680	592	4553980	592	3005810	592	3251840	592	2299000	592	2054280	592	1578410	592	850830	592	454750	592	447400	592	432770
				593	6719330	593	6797560	593	4589300	593	3045470	593	3296230	593	2302030	593	2090390	593	1607750	593	869320	593	469290	593	463380	593	432190
				594	6743520	594	6846670	594	4622420	594	3085260	594	3332050	594	2304890	594	2121930	594	1636830	594	884660	594	479810	594	473320	594	431170
				595	6764150	595	6861140	595	4665340	595	3124940	595	3381020	595	2295400	595	2153710	595	1664540	595	906310	595	493470	595	481130	595	427900
				596	6802710	596	6934500	596	4717060	596	3148080	596	3410290	596	2299680	596	2186060	596	1693960	596	920440	596	501700	596	493590	596	432550
				597	6835960	597	6956590	597	4744200	597	3181730	597	3443240	597	2313940	597	2208590	597	1710210	597	944680	597	519780	597	507720	597	431500
				598	6862810	598	6984690	598	4781240	598	3212070	598	3476210	598	2328970	598	2226940	598	1739570	598	959040	598	532710	598	514850	598	429480
				599	6905380	599	7028110	599	4824410	599	3238790	599	3510120	599	2348260	599	2263930	599	1762130	599	981980	599	541680	599	526980	599	427230
				600	6914330	600	7066000	600	4862890	600	3278290	600	3547550	600	2366650	600	2295500	600	1792770	600	997830	600	557280	600	543280	600	428550
				601	6941760	601	7073500	601	4899670	601	3302440	601	3592550	601	2391740	601	2314160	601	1813500	601	1013720	601	569000	601	556180	601	424410
				602	6962140	602	7113500	602	4920380	602	3338810	602	3604610	602	2403590	602	2340290	602	1836430	602	1034090	602	588340	602	567930	602	428050
				603	6991520	603	7141800	603	4948980	603	3359650	603	3635600	603	2431590	603	2374070	603	1853720	603	1053430	603	594120	603	577720	603	425440
				604	7007320	604	7189080	604	4988420	604	3386220	604	3669390	604	2453120	604	2401760	604	1880820	604	1067440	604	601780	604	586700	604	423120
				605	7030060	605	7200030	605	5010560	605	3407810	605	3688410	605	2481430	605	2416050	605	1902050	605	1091530	605	621570	605	600840	605	423770
				606	7048760	606	7224150	606	5045860	606	3431680	606	3725210	606	2498870	606	2438260	606	1921840	606	1106120	606	629400	606	608690	606	419230
				607	7061730	607	7250270	607	5080520	607	3450640	607	3756880	607	2514260	607	2457650	607	1945520	607	1116320	607	644080	607	622310	607	415470
				608	7081730	608	7265220	608	5106640	608	3477290	608	3774110	608	2532290	608	2474630	608	1965600	608	1132310	608	653510	608	630530	608	415610
				609	7106630	609	7302770	609	5133000	609	3500260	609	3794710	609	2561840	609	2494210	609	1982780	609	1154970	609	661110	609	643760	609	410620
				610	7112620	610	7297880	610	5153580	610	3523230	610	3829120	610	2581590	610	2515640	610	2001450	610	1162800	610	671760	610	654950	610	411830
				611	7130820	611	7337070	611	5175260	611	3537740	611	3848890	611	2596270	611	2534130	611	2013390	611	1179140	611	682500	611	664440	611	415800
				612	7133610	612	7339330	612	5198660	612	3573770	612	3870170	612	2613320	612	2554890	612	2029590	612	1199670	612	687650	612	673120	612	411270
				613	7144630	613	7357910	613	5222470	613	3585490	613	3886730	613	2639620	613	2569080	613	2051210	613	1204860	613	696920	613	681860	613	411990
				614	7151030	614	7377360	614	5243230	614	3600540	614	3911170	614	2645120	614	2585840	614	2064150	614	1213110	614	713770	614	689190	614	408350
				615	7161790	615	7400370	615	5261330	615	3622200	615	3933410	615	2667380	615	2599330	615	2076650	615	1224630	615	724050	615	696780	615	407960
				616	7157660	616	7386620	616	5276630	616	3641470	616	3949660	616	2687960	616	2624730	616	2092480	616	1240650	616	730820	616	709130	616	405680
				617	7188220	617	7413370	617	5291910	617	3666420	617	3968740	617	2704300	617	2633390	617	2112150	617	1249330	617	738330	617	720120	617	405640
				618	7176050	618	7412930	618	5318860	618	3667500	618	3988630	618	2717390	618	2653780	618	2123760	618	1264950	618	748080	618	731690	618	401740
				619	7181870	619	7429870	619	5334980	619	3694260	619	3999010	619	2731990	619	2662830	619	2135220	619	1271560	619	748150	619	728240	619	401530
				620	7170130	620	7438210	620	5350510	620	3705230	620	4015190	620	2758330	620	2677670	620	2149060	620	1290430	620	764930	620	741680	620	397960
				621	7182700	621	7452500	621	5361720	621	3725300	621	4038200	621	2774160	621	2680080	621	2154930	621	1296840	621	770860	621	750010	621	397740
				622	7179420	622	7449090	622	5374160	622	3732620	622	4047910	622	2795270	622	2700100	622	2174620	622	1306180	622	778680	622	759780	622	392290
				623	7182990	623	7465360	623	5401610	623	3750020	623	4055140	623	2810350	623	2703720	623	2186370	623	1312340	623	782070	623	764460	623	389380
				624	7176870	624	7465130	624	5398870	624	3757380	624	4081970	624	2830570	624	2724480	624	2192020	624	1321590	624	786530	624	774960	624	388010
				625	7192180	625	7462010	625	5421850	625	3768370	625	4089170	625	2837690	625	2742250	625	2200780	625	1324210	625	797640	625	783640	625	385720
				626	7173560	626	7467230	626	5438870	626	3770250	626	4100090	626	2857170	626	2747410	626	2210240	626	1340270	626	802320	626	788160	626	385800
				627	7170850	627	7471160	627	5445060	627	3800900	627	4121810	627	2868500	627	2760890	627	2226490	627	1349090	627	808260	627	791830	627	381230
				628	7164470	628	7476080	628	5453670	628	3805760	628	4135640	628	2877650	628	2769810	628	2230200	628	1362520	628	812950	628	800690	628	381300
				629	7161010	629	7465930	629	5447470	629	3810360	629	4139880	629	2907240	629	2772020	629	2242880	629	1365010	629	826740	629	807300	629	380580
				630	7152550	630	7474060	630	5462350	630	3817850	630	4145680	630	2908650	630	2785090	630	2260600	630	1374220	630	828260	630	806320	630	376340
				631	7151210	631	7446730	631	5485500	631	3830100	631	4159720	631	2913250	631	2796060	631	2257620	631	1382250	631	833630	631	818130	631	379710
				632	7131030	632	7461140	632	5490740	632	3837720	632	4164100	632	2922720	632	2807890	632	2266070	632	1383590	632	833370	632	820970	632	372260
				633	7139160	633	7455370	633	5500680	633	3837660	633	4167860	633	2922120	633	2808200	633	2271780	633	1391590	633	844040	633	823210	633	366740
				634	7128000	634	7458970	634	5500480	634	3844910	634	4182300	634	2932380	634	2826620	634	2276420	634	1397300	634	848600	634	833930	634	366820
				635	7106970	635	7452720	635	5509310	635	3857570	635	4188360	635	2937990	635	2826650	635	2298830	635	1404550	635	851360	635	841980	635	368460
				636	7096670	636	7442900	636	5512620	636	3861810	636	4204100	636	2941200	636	2830180	636	2304460	636	1413260	636	852660	636	836780	636	362860
				637	7085970	637	7422300	637	5513970	637	3865020	637	4198330	637	2932560	637	2841420	637	2304210	637	1413420	637	859680	637	848170	637	362110
				638	7072920	638	7423090	638	5514100	638	3875840	638	4212490	638	2953120	638	2844500	638	2310920	638	1427060	638	861810	638	854970	638	357720
				639	7055090	639	7404490	639	5523000	639	3884120	639	4213410	639	2944800	639	2847410	639	2313920	639	1426240	639	864960	639	858540	639	350250
				640	7032910	640	7416670	640	5530900	640	3882950	640	4216970	640	2951190	640	2857320	640	2325510	640	1431500	640	873820	640	858290	640	350610
				641	7038410	641	7386750	641	5526970	641	3885880	641	4212220	641	2959370	641	2849900	641	2318990	641	1436890	641	874770	641	861750	641	349180
				642	7009850	642	7366610	642	5522940	642	3880720	642	4215450	642	2955520	642	2861590	642	2340830	642	1432870	642	874970	642	867500	642	345760
				643	6990060	643	7365280	643	5511590	643	3885400	643	4217970	643	2954150	643	2859990	643	2329200	643	1445090	643	880190	643	863840	643	343280
				644	6955070	644	7338050	644	5513800	644	3889160	644	4234710	644	2956440	644	2863990	644	2341650	644	1442560	644	881210	644	876630	644	344700
				645	6954940	645	7320480	645	5514340	645	3880630	645	4231990	645	2954720	645	2870510	645	2337600	645	1445540	645	881040	645	877460	645	337730
				646	6903910	646	7295250	646	5515990	646	3876260	646	4214840	646	2966650	646	2866650	646	2340830	646	1449490	646	880600	646	878860	646	336700
				647	6884400	647	7271570	647	5492190	647	3891340	647	4227550	647	2954220	647	2864120	647	2335780	647	1447810	647	891470	647	880880	647	332670
				648	6842050	648	7263680	648	5491550	648	3878550	648	4211630	648	2952330	648	2859410	648	2346860	648	1458990	648	891050	648	884570	648	329420
				649	6830300	649	7230300	649	5474690	649	3879060	649	4211450	649	2952300	649	2868480	649	2344510	649	1460450	649	891400	649	882880	649	327000
				650	6799630	650	7210980	650	5446130	650	3867870	650	4199230	650	2960250	650	2858950	650	2348220	650	1455880	650	896330	650	884950	650	325240
				651	6753700	651	7161480	651	5445100	651	3869990	651	4191840	651	2965470	651	2860820	651	2342460	651	1456520	651	893190	651	884500	651	319650
				652	6720160	652	7135500	652	5415820	652	3862430	652	4181080	652	2998870	652	2857540	652	2344270	652	1456670	652	896330	652	886370	652	316260
				653	6689950	653	7106180	653	5431800	653	3853680	653	4181080	653	3030010	653	2840050	653	2334480	653	1461370	653	894090	653	890110	653	317580
				654	6637700	654	7076650	654	5409170	654	3826060	654	4169300	654	3071370	654	2842370	654	2336270	654	1462200	654	900300	654	893050	654	310590
				655	6628240	655	7030620	655	5385410	655	3823900	655	4156880	655	3083470	655	2838390	655	2331600	655	1453260	655	901480	655	884620	655	308280
				656	6578100	656	7003500	656	5372380	656	3814100	656	4144600	656	3083040	656	2826840	656	2331400	656	1448720	656	893590	656	889070	656	303460
				657	6527920	657	6968040	657	5331870	657	3807560	657	4125960	657	3053090	657	2815940	657	2310630	657	1453780	657	893720	657	888590	657	298890
				658	6492030	658	6929810	658	5316440	658	3788710	658	4110190	658	3020330	658	2814240	658	2323060	658	1446540	658	890090	658	882910	658	296570
				659	6455680	659	6890010	659	5305220	659	3774160	659	4097500	659	2980110	659	2801260	659	2303030	659	1442290	659	888740	659	884360	659	294500
				660	6406210	660	6843380	660	5279600	660	3753460	660	4084220	660	2941620	660	2797340	660	2310030	660	1445520	660	885280	660	884290	660	288900
				661	6368160	661	6788680	661	5253990	661	3735450	661	4071610	661	2901890	661	2790070	661	2298190	661	1441530	661	886040	661	883100	661	287060
				662	6313620	662	6748460	662	5224850	662	3727770	662	4050800	662	2881960	662	2774620	662	2283890	662	1441070	662	885420	662	885510	662	282030
				663	6263880	663	6708160	663	5191320	663	3708530	663	4027160	663	2870670	663	2770090	663	2284970	663	1432040	663	884320	663	876000	663	278680
				664	6213250	664	6665140	664	5168250	664	3697000	664	4003160	664	2853330	664	2756800	664	2279570	664	1428250	664	880140	664	876860	664	273830
				665	6157990	665	6612620	665	5144180	665	3683320	665	3994660	665	2842140	665	2724090	665	2261680	665	1426300	665	875540	665	880720	665	271090
				666	6117650	666	6585300	666	5105370	666	3651410	666	3975170	666	2828970	666	2718210	666	2246730	666	1411860	666	875660	666	873480	666	271070
				667	6049900	667	6520440	667	5077170	667	3629740	667	3947370	667	2812400	667	2711580	667	2238980	667	1415450	667	870010	667	864770	667	263150
				668	6017330	668	6472140	668	5040600	668	3627150	668	3910830	668	2805280	668	2699320	668	2237200	668	1408620	668	866300	668	866600	668	259160
				669	5957910	669	6418800	669	5005540	669	3584540	669	3897490	669	2788470	669	2691260	669	2222790	669	1407100	669	859650	669	860880	669	257590
				670	5913990	670	6352960	670	4968040	670	3566480	670	3868630	670	2768290	670	2670470	670	2201180	670	1392720	670	859990	670	856740	670	254360
				671	5833840	671	6310910	671	4943600	671	3545910	671	3848460	671	2750260	671	2650210	671	2199830	671	1377840	671	859590	671	859850	671	246550
				672	5797390	672	6246310	672	4897580	672	3518990	672	3818460	672	2737710	672	2636230	672	2189090	672	1380920	672	857070	672	847710	672	247020
				673	5732580	673	6182060	673	4863150	673	3491640	673	3788320	673	2712840	673	2616940	673	2164150	673	1369030	673	851160	673	848050	673	241640
				674	5667510	674	6121400	674	4826110	674	3473330	674	3766290	674	2692810	674	2598800	674	2157030	674	1361620	674	843920	674	841860	674	239820
				675	5623550	675	6084300	675	4781870	675	3425880	675	3723690	675	2669340	675	2561230	675	2137750	675	1353920	675	842050	675	838440	675	236280
				676	5534590	676	6005260	676	4736480	676	3406660	676	3697770	676	2634740	676	2542390	676	2122720	676	1339680	676	824950	676	829750	676	231110
				677	5469490	677	5932940	677	4677620	677	3366730	677	3665420	677	2611470	677	2518780	677	2095820	677	1323520	677	824730	677	828020	677	225590
				678	5406340	678	5888780	678	4643660	678	3337580	678	3630110	678	2587770	678	2510020	678	2078610	678	1314740	678	817290	678	817980	678	224640
				679	5336790	679	5802060	679	4601290	679	3307770	679	3589420	679	2556840	679	2475820	679	2066350	679	1304640	679	809380	679	810900	679	219530
				680	5278100	680	5749970	680	4557170	680	3282480	680	3550920	680	2539040	680	2455810	680	2047800	680	1297240	680	804290	680	809110	680	217720
				681	5215740	681	5679950	681	4512920	681	3253020	681	3531600	681	2504630	681	2438280	681	2030570	681	1284570	681	797970	681	801230	681	210570
				682	5173360	682	5629750	682	4490430	682	3235910	682	3504320	682	2498200	682	2421500	682	2025880	682	1284330	682	793030	682	799380	682	209670
				683	5128020	683	5600940	683	4462450	683	3211670	683	3498270	683	2485830	683	2410820	683	2009800	683	1275750	683	790850	683	801210	683	207100
				684	5087960	684	5548690	684	4435650	684	3209160	684	3468760	684	2472930	684	2410280	684	2007310	684	1277950	684	792360	684	798310	684	202380
				685	5058990	685	5525000	685	4414640	685	3193760	685	3464060	685	2472000	685	2400250	685	2003630	685	1275600	685	791610	685	795800	685	204510
				686	5037110	686	5502250	686	4410990	686	3176650	686	3454400	686	2469290	686	2397750	686	2000430	686	1273960	686	793560	686	800380	686	201300

## Sheet: Fig S2
2014-04-15	AEC
		th (hrs)				th (hrs)				th (hrs)				th (hrs)
	GLU-CdSe	0			GLU-CdSe	0.4			GLU-CdSe	17.5			GLU-CdSe	24.5
correct nm values	Wavelength (nm)	CPS			Wavelength (nm)	CPS			Wavelength (nm)	CPS			Wavelength (nm)	CPS
382	390	77110	0.0569384		390	593780	0.36911		390	957200	0.116849		390	763170	0.0647808
383	391	88840	0.0655999		391	677930	0.42142		391	1096760	0.133885		391	877840	0.0745145
384	392	104250	0.0769787		392	806580	0.501392		392	1288250	0.157261		392	1030870	0.0875042
385	393	125450	0.0926329		393	962500	0.598317		393	1530250	0.186803		393	1235060	0.104837
386	394	157880	0.116579		394	1201420	0.746836		394	1900310	0.231977		394	1534260	0.130234
387	395	288170	0.212786		395	2176320	1.35286		395	3373490	0.411813		395	2768540	0.235004
388	396	938940	0.693318		396	6327330	3.93324		396	9032410	1.10262		396	7744270	0.657364
389	397	2703970	1.99663		397	13254500	8.23936		397	16076400	1.9625		397	14922200	1.26665
390	398	5971870	4.40966		398	18054100	11.2229		398	19468700	2.37661		398	18987800	1.61176
391	399	9862470	7.2825		399	19716100	12.2561		399	18223900	2.22465		399	19321700	1.6401
392	400	13437300	9.92217		400	17510200	10.8848		400	18989100	2.31806		400	15548300	1.3198
393	401	16034700	11.8401		401	18445200	11.466		401	16024300	1.95614		401	17676100	1.50042
394	402	17517400	12.9349		402	17563200	10.9178		402	13962500	1.70445		402	15059500	1.27831
395	403	18379700	13.5717		403	15814900	9.83098		403	12806700	1.56336		403	13674300	1.16073
396	404	18810700	13.8899		404	14908800	9.26772		404	12149400	1.48312		404	12912600	1.09607
397	405	18934300	13.9812		405	14677200	9.12375		405	11914400	1.45443		405	12648500	1.07365
398	406	18789700	13.8744		406	15109700	9.39261		406	12073600	1.47386		406	12769900	1.08396
399	407	18245200	13.4724		407	16655700	10.3536		407	12712200	1.55182		407	13566700	1.15159
400	408	17361900	12.8201		408	18415000	11.4473		408	14171700	1.72999		408	15365800	1.30431
401	409	15697400	11.591		409	17159100	10.6666		409	17204700	2.10023		409	18149200	1.54057
402	410	13111500	9.6816		410	17087700	10.6222		410	17506900	2.13712		410	16015600	1.35947
403	411	9661130	7.13383		411	19530500	12.1407		411	17335300	2.11618		411	18269200	1.55076
404	412	5815250	4.29401		412	18054600	11.2232		412	19428400	2.37169		412	19258300	1.63472
405	413	2980560	2.20086		413	13808300	8.58362		413	16796500	2.0504		413	16250600	1.37941
406	414	1283610	0.947824		414	7421420	4.61336		414	10687900	1.30471		414	10003200	0.84911
407	415	594560	0.439026		415	2897350	1.80107		415	4648210	0.567422		415	4258970	0.361518
408	416	449780	0.33212		416	1726890	1.07348		416	2822620	0.344567		416	2560530	0.217348
409	417	432660	0.319478		417	1445540	0.898588		417	2363600	0.288532		417	2150630	0.182554
410	418	428110	0.316119		418	1288610	0.801036		418	2112270	0.257852		418	1913940	0.162463
411	419	435070	0.321258		419	1178680	0.7327		419	1931970	0.235842		419	1756050	0.14906
412	420	434960	0.321177		420	1086580	0.675448		420	1776160	0.216822		420	1622600	0.137733
413	421	437520	0.323067		421	1015220	0.631089		421	1662540	0.202952		421	1519170	0.128953
414	422	446120	0.329417		422	957150	0.594991		422	1558950	0.190306		422	1425330	0.120988
415	423	447180	0.3302		423	912490	0.567229		423	1485580	0.18135		423	1360470	0.115482
416	424	453390	0.334786		424	873790	0.543172		424	1420730	0.173433		424	1304110	0.110698
417	425	450750	0.332836		425	832230	0.517337		425	1359160	0.165917		425	1242770	0.105491
418	426	459780	0.339504		426	808320	0.502474		426	1309820	0.159894		426	1201930	0.102024
419	427	466160	0.344215		427	781040	0.485516		427	1258360	0.153612		427	1160680	0.098523
420	428	475530	0.351134		428	759680	0.472238		428	1232200	0.150419		428	1130400	0.0959527
421	429	483430	0.356967		429	742510	0.461565		429	1201120	0.146625		429	1099610	0.0933392
422	430	497880	0.367637		430	729850	0.453695		430	1172960	0.143187		430	1081100	0.091768
423	431	516050	0.381054		431	719890	0.447504		431	1152820	0.140729		431	1060920	0.090055
424	432	537970	0.39724		432	719950	0.447541		432	1145890	0.139883		432	1050270	0.089151
425	433	554150	0.409187		433	714500	0.444153		433	1123380	0.137135		433	1030930	0.0875093
426	434	576250	0.425506		434	712450	0.442879		434	1114430	0.136042		434	1026080	0.0870977
427	435	597830	0.441441		435	713680	0.443643		435	1108310	0.135295		435	1020700	0.086641
428	436	614560	0.453794		436	714510	0.444159		436	1106620	0.135089		436	1015940	0.0862369
429	437	642280	0.474263		437	715450	0.444744		437	1108650	0.135337		437	1014410	0.0861071
430	438	674120	0.497774		438	725280	0.450854		438	1104500	0.13483		438	1012610	0.0859543
431	439	721350	0.532649		439	746740	0.464194		439	1112180	0.135767		439	1013220	0.086006
432	440	777950	0.574442		440	762730	0.474134		440	1129090	0.137832		440	1015190	0.0861733
433	441	839010	0.619529		441	787320	0.48942		441	1146000	0.139896		441	1027660	0.0872318
434	442	919260	0.678786		442	811580	0.504501		442	1165560	0.142284		442	1041790	0.0884312
435	443	971340	0.717242		443	840530	0.522497		443	1176370	0.143603		443	1047990	0.0889575
436	444	1026020	0.757618		444	859040	0.534003		444	1204430	0.147029		444	1060430	0.0900134
437	445	1056410	0.780059		445	860830	0.535116		445	1201640	0.146688		445	1061120	0.090072
438	446	1068360	0.788883		446	854290	0.53105		446	1202050	0.146738		446	1059450	0.0899302
439	447	1042810	0.770016		447	844430	0.524921		447	1182900	0.1444		447	1053350	0.0894124
440	448	1017620	0.751416		448	818310	0.508684		448	1160440	0.141659		448	1046590	0.0888386
441	449	978690	0.72267		449	793990	0.493566		449	1138370	0.138965		449	1030190	0.0874465
442	450	950150	0.701596		450	763450	0.474582		450	1110830	0.135603		450	1005330	0.0853363
443	451	909560	0.671624		451	739150	0.459476		451	1084400	0.132376		451	998390	0.0847472
444	452	876550	0.647249		452	711610	0.442356		452	1055940	0.128902		452	986450	0.0837337
445	453	853430	0.630177		453	692140	0.430253		453	1042440	0.127254		453	977270	0.0829545
446	454	833140	0.615195		454	678900	0.422023		454	1023220	0.124908		454	974550	0.0827236
447	455	823180	0.60784		455	660630	0.410666		455	1009020	0.123174		455	977630	0.082985
448	456	802640	0.592674		456	649470	0.403729		456	1009900	0.123282		456	980590	0.0832363
449	457	791110	0.58416		457	644000	0.400328		457	1007520	0.122991		457	988350	0.083895
450	458	777940	0.574435		458	633830	0.394006		458	1013730	0.123749		458	1002980	0.0851368
451	459	781690	0.577204		459	629930	0.391582		459	1020120	0.124529		459	1024170	0.0869355
452	460	776450	0.573335		460	629310	0.391197		460	1037000	0.12659		460	1043220	0.0885526
453	461	775810	0.572862		461	634410	0.394367		461	1042310	0.127238		461	1084790	0.0920812
454	462	777160	0.573859		462	631150	0.39234		462	1069460	0.130553		462	1112430	0.0944274
455	463	778270	0.574679		463	634470	0.394404		463	1089430	0.13299		463	1150820	0.0976861
456	464	781360	0.57696		464	645010	0.400956		464	1122890	0.137075		464	1198720	0.101752
457	465	793840	0.586176		465	650110	0.404126		465	1147100	0.14003		465	1245660	0.105736
458	466	798210	0.589402		466	656390	0.40803		466	1186550	0.144846		466	1300130	0.11036
459	467	811990	0.599578		467	664450	0.413041		467	1224690	0.149502		467	1356670	0.115159
460	468	820300	0.605714		468	678840	0.421986		468	1262860	0.154161		468	1436740	0.121956
461	469	828720	0.611931		469	679650	0.422489		469	1309940	0.159909		469	1509130	0.128101
462	470	841950	0.6217		470	698480	0.434194		470	1368450	0.167051		470	1594950	0.135386
463	471	859480	0.634644		471	713130	0.443301		471	1418160	0.173119		471	1672170	0.14194
464	472	871630	0.643616		472	726280	0.451476		472	1484440	0.18121		472	1770930	0.150323
465	473	892370	0.658931		473	749890	0.466152		473	1545570	0.188673		473	1875040	0.159161
466	474	909590	0.671646		474	767250	0.476944		474	1618600	0.197588		474	1991910	0.169081
467	475	913880	0.674814		475	787420	0.489482		475	1695980	0.207034		475	2099900	0.178248
468	476	935370	0.690682		476	802200	0.49867		476	1778190	0.21707		476	2220310	0.188469
469	477	962270	0.710545		477	827270	0.514254		477	1867500	0.227972		477	2361120	0.200421
470	478	969870	0.716157		478	845500	0.525586		478	1954540	0.238597		478	2495270	0.211808
471	479	989620	0.730741		479	870390	0.541059		479	2041270	0.249185		479	2648980	0.224856
472	480	1010470	0.746136		480	889110	0.552695		480	2147420	0.262143		480	2797750	0.237484
473	481	1040150	0.768052		481	917950	0.570623		481	2258460	0.275698		481	2973690	0.252418
474	482	1049160	0.774705		482	936740	0.582304		482	2359390	0.288019		482	3145160	0.266973
475	483	1068410	0.788919		483	962930	0.598584		483	2484910	0.303341		483	3318530	0.28169
476	484	1088920	0.804064		484	993570	0.617631		484	2608100	0.318379		484	3526350	0.29933
477	485	1101820	0.81359		485	1020830	0.634576		485	2726200	0.332796		485	3713930	0.315253
478	486	1117220	0.824961		486	1039330	0.646076		486	2847310	0.347581		486	3917480	0.332531
479	487	1134290	0.837566		487	1067170	0.663382		487	2994490	0.365547		487	4114770	0.349278
480	488	1148140	0.847793		488	1093470	0.679731		488	3122000	0.381113		488	4348740	0.369138
481	489	1159870	0.856454		489	1115460	0.693401		489	3251870	0.396966		489	4557020	0.386818
482	490	1174480	0.867242		490	1135570	0.705902		490	3387990	0.413583		490	4774710	0.405296
483	491	1184330	0.874515		491	1157110	0.719292		491	3549290	0.433274		491	5027380	0.426744
484	492	1198080	0.884668		492	1186470	0.737543		492	3688210	0.450232		492	5233630	0.444251
485	493	1210270	0.89367		493	1203430	0.748085		493	3839980	0.468759		493	5464550	0.463852
486	494	1219690	0.900625		494	1224900	0.761432		494	3974690	0.485203		494	5691310	0.4831
487	495	1232690	0.910225		495	1240760	0.771291		495	4121770	0.503158		495	5942220	0.504399
488	496	1231940	0.909671		496	1265410	0.786614		496	4291710	0.523903		496	6183810	0.524906
489	497	1251380	0.924025		497	1287300	0.800221		497	4427600	0.540492		497	6386230	0.542088
490	498	1254240	0.926137		498	1296420	0.805891		498	4590020	0.560319		498	6620620	0.561984
491	499	1261940	0.931823		499	1324640	0.823433		499	4726300	0.576955		499	6840160	0.580619
492	500	1273310	0.940219		500	1342790	0.834715		500	4871350	0.594662		500	7084280	0.601341
493	501	1277110	0.943025		501	1370320	0.851829		501	5027450	0.613717		501	7291910	0.618966
494	502	1286200	0.949737		502	1382950	0.85968		502	5170330	0.631159		502	7504760	0.637033
495	503	1291370	0.953554		503	1409210	0.876004		503	5322990	0.649795		503	7739260	0.656938
496	504	1298620	0.958908		504	1421610	0.883712		504	5456810	0.666131		504	7936540	0.673684
497	505	1297440	0.958036		505	1443260	0.89717		505	5591060	0.682519		505	8140500	0.690997
498	506	1317500	0.972849		506	1449880	0.901286		506	5718380	0.698061		506	8326780	0.706809
499	507	1318680	0.97372		507	1473550	0.915999		507	5835190	0.712321		507	8512110	0.722541
500	508	1329390	0.981628		508	1484240	0.922645		508	5974300	0.729302		508	8686110	0.737311
501	509	1330540	0.982478		509	1500810	0.932945		509	6106430	0.745432		509	8859910	0.752064
502	510	1333240	0.984471		510	1517260	0.943171		510	6209430	0.758006		510	9035620	0.766978
503	511	1348950	0.996072		511	1527210	0.949356		511	6322050	0.771753		511	9181650	0.779374
504	512	1344480	0.992771		512	1542520	0.958873		512	6429090	0.78482		512	9331300	0.792077
505	513	1349190	0.996249		513	1545380	0.960651		513	6547390	0.799261		513	9478660	0.804585
506	514	1354270	1		514	1562110	0.971051		514	6643860	0.811038		514	9633860	0.817759
507	515	1349810	0.996707		515	1569690	0.975763		515	6744510	0.823325		515	9745140	0.827205
508	516	1351410	0.997888		516	1579440	0.981824		516	6832570	0.834074		516	9871360	0.837919
509	517	1336370	0.986783		517	1584700	0.985093		517	6927780	0.845697		517	10000900	0.848915
510	518	1347060	0.994676		518	1589220	0.987903		518	7007910	0.855479		518	10109000	0.858091
511	519	1344160	0.992535		519	1589300	0.987953		519	7087550	0.865201		519	10226500	0.868065
512	520	1338640	0.988459		520	1612470	1.00236		520	7175850	0.87598		520	10320400	0.876036
513	521	1330140	0.982182		521	1607940	0.99954		521	7242260	0.884087		521	10416200	0.884167
514	522	1328840	0.981222		522	1608680	1		522	7310490	0.892416		522	10511500	0.892257
515	523	1321460	0.975773		523	1608050	0.999608		523	7354970	0.897845		523	10592600	0.899141
516	524	1307590	0.965531		524	1613640	1.00308		524	7427190	0.906662		524	10672800	0.905949
517	525	1310910	0.967983		525	1604890	0.997644		525	7468720	0.911731		525	10732900	0.91105
518	526	1299420	0.959498		526	1600460	0.99489		526	7512860	0.91712		526	10793700	0.916211
519	527	1286490	0.949951		527	1594510	0.991192		527	7556490	0.922446		527	10856100	0.921508
520	528	1280520	0.945543		528	1594760	0.991347		528	7601070	0.927888		528	10915500	0.92655
521	529	1278380	0.943962		529	1596910	0.992683		529	7635590	0.932102		529	10959800	0.93031
522	530	1260020	0.930405		530	1589180	0.987878		530	7665570	0.935761		530	11013200	0.934843
523	531	1259730	0.930191		531	1588910	0.98771		531	7719310	0.942322		531	11053200	0.938238
524	532	1251720	0.924277		532	1582250	0.98357		532	7746890	0.945688		532	11108200	0.942907
525	533	1248880	0.922179		533	1577970	0.98091		533	7795570	0.951631		533	11162200	0.947491
526	534	1241150	0.916472		534	1576940	0.98027		534	7820720	0.954701		534	11227100	0.953
527	535	1234270	0.911391		535	1573890	0.978374		535	7843120	0.957435		535	11246900	0.95468
528	536	1215890	0.897819		536	1561820	0.970871		536	7888140	0.962931		536	11303100	0.959451
529	537	1213980	0.896409		537	1564390	0.972468		537	7907360	0.965277		537	11342000	0.962753
530	538	1203940	0.888996		538	1563310	0.971797		538	7940660	0.969343		538	11382100	0.966157
531	539	1197140	0.883974		539	1559230	0.969261		539	7960850	0.971807		539	11424800	0.969781
532	540	1183830	0.874146		540	1549360	0.963125		540	7973520	0.973354		540	11444500	0.971454
533	541	1182200	0.872943		541	1555070	0.966675		541	8014530	0.97836		541	11498000	0.975995
534	542	1169360	0.863461		542	1543390	0.959414		542	8046100	0.982214		542	11523600	0.978168
535	543	1164060	0.859548		543	1542080	0.9586		543	8053340	0.983098		543	11563800	0.98158
536	544	1156100	0.85367		544	1540270	0.957474		544	8075170	0.985763		544	11576700	0.982675
537	545	1141570	0.842941		545	1532870	0.952874		545	8105000	0.989404		545	11609200	0.985434
538	546	1145150	0.845585		546	1536680	0.955243		546	8134500	0.993005		546	11634300	0.987565
539	547	1128450	0.833253		547	1525180	0.948094		547	8129490	0.992394		547	11661400	0.989865
540	548	1120590	0.827449		548	1515790	0.942257		548	8135130	0.993082		548	11670100	0.990603
541	549	1112500	0.821476		549	1513470	0.940815		549	8143390	0.99409		549	11693600	0.992598
542	550	1101000	0.812984		550	1505070	0.935593		550	8155910	0.995619		550	11710300	0.994016
543	551	1094470	0.808162		551	1502320	0.933884		551	8168570	0.997164		551	11732300	0.995883
544	552	1095020	0.808568		552	1491100	0.926909		552	8177280	0.998227		552	11749300	0.997326
545	553	1081480	0.79857		553	1478040	0.918791		553	8181110	0.998695		553	11760800	0.998302
546	554	1074210	0.793202		554	1475920	0.917473		554	8180160	0.998579		554	11762700	0.998464
547	555	1058950	0.781934		555	1468080	0.912599		555	8191800	1		555	11757100	0.997988
548	556	1047670	0.773605		556	1458070	0.906377		556	8170830	0.99744		556	11781900	1.00009
549	557	1037590	0.766162		557	1454320	0.904046		557	8183470	0.998983		557	11772500	0.999295
550	558	1019020	0.75245		558	1444930	0.898208		558	8170360	0.997383		558	11780800	1
551	559	1021170	0.754037		559	1440670	0.89556		559	8165890	0.996837		559	11787900	1.0006
552	560	1005300	0.742319		560	1424740	0.885658		560	8149220	0.994802		560	11772500	0.999295
553	561	991550	0.732166		561	1419000	0.88209		561	8167660	0.997053		561	11775800	0.999576
554	562	982260	0.725306		562	1411260	0.877278		562	8148790	0.99475		562	11776400	0.999627
555	563	975130	0.720041		563	1399670	0.870074		563	8140990	0.993797		563	11750200	0.997403
556	564	963380	0.711365		564	1390080	0.864112		564	8104960	0.989399		564	11759000	0.99815
557	565	952570	0.703383		565	1376980	0.855969		565	8093850	0.988043		565	11745400	0.996995
558	566	939490	0.693724		566	1374850	0.854645		566	8085450	0.987018		566	11730000	0.995688
559	567	929850	0.686606		567	1365340	0.848733		567	8059030	0.983792		567	11724300	0.995204
560	568	920880	0.679983		568	1355980	0.842915		568	8042130	0.981729		568	11707300	0.993761
561	569	907210	0.669889		569	1340070	0.833025		569	8008840	0.977665		569	11701800	0.993294
562	570	903040	0.666809		570	1328540	0.825857		570	7990750	0.975457		570	11671600	0.990731
563	571	885830	0.654101		571	1318680	0.819728		571	7984520	0.974697		571	11653200	0.989169
564	572	873850	0.645255		572	1307330	0.812673		572	7928100	0.967809		572	11620700	0.98641
565	573	869620	0.642132		573	1305630	0.811616		573	7911440	0.965776		573	11612000	0.985672
566	574	856400	0.63237		574	1284840	0.798692		574	7884480	0.962484		574	11586100	0.983473
567	575	845070	0.624004		575	1274470	0.792246		575	7851870	0.958504		575	11569900	0.982098
568	576	835630	0.617034		576	1263130	0.785197		576	7818280	0.954403		576	11522300	0.978058
569	577	820900	0.606157		577	1251270	0.777824		577	7794400	0.951488		577	11506800	0.976742
570	578	817240	0.603454		578	1241800	0.771937		578	7754790	0.946653		578	11466400	0.973313
571	579	804270	0.593877		579	1233710	0.766908		579	7730280	0.943661		579	11448700	0.97181
572	580	795370	0.587305		580	1223570	0.760605		580	7691740	0.938956		580	11397500	0.967464
573	581	783710	0.578696		581	1208100	0.750988		581	7651770	0.934077		581	11369900	0.965121
574	582	772410	0.570352		582	1205980	0.749671		582	7614400	0.929515		582	11325400	0.961344
575	583	758410	0.560014		583	1184470	0.736299		583	7572290	0.924374		583	11304600	0.959578
576	584	750630	0.554269		584	1181210	0.734273		584	7533860	0.919683		584	11257900	0.955614
577	585	743140	0.548738		585	1163560	0.723301		585	7484750	0.913688		585	11223500	0.952694
578	586	730620	0.539494		586	1153700	0.717172		586	7464160	0.911175		586	11187800	0.949664
579	587	721340	0.532641		587	1145850	0.712292		587	7415120	0.905188		587	11136000	0.945267
580	588	708520	0.523175		588	1134190	0.705044		588	7370430	0.899733		588	11096600	0.941922
581	589	696860	0.514565		589	1119190	0.695719		589	7323220	0.89397		589	11054200	0.938323
582	590	690280	0.509706		590	1107250	0.688297		590	7279100	0.888584		590	11001800	0.933875
583	591	681640	0.503327		591	1093420	0.6797		591	7223820	0.881835		591	10956800	0.930056
584	592	671790	0.496053		592	1088320	0.67653		592	7178420	0.876293		592	10910700	0.926143
585	593	663450	0.489895		593	1071960	0.66636		593	7128260	0.87017		593	10842100	0.92032
586	594	647230	0.477918		594	1065840	0.662556		594	7071480	0.863239		594	10799800	0.916729
587	595	642110	0.474137		595	1046000	0.650223		595	7027000	0.857809		595	10744300	0.912018
588	596	632840	0.467292		596	1038940	0.645834		596	6975050	0.851467		596	10705400	0.908716
589	597	621940	0.459244		597	1026930	0.638368		597	6934900	0.846566		597	10645800	0.903657
590	598	610430	0.450745		598	1005970	0.625339		598	6871290	0.838801		598	10596000	0.89943
591	599	606700	0.44799		599	1001240	0.622398		599	6812130	0.831579		599	10533400	0.894116
592	600	590460	0.435999		600	989780	0.615275		600	6754880	0.82459		600	10472100	0.888912
593	601	583890	0.431147		601	971070	0.603644		601	6699010	0.81777		601	10399600	0.882758
594	602	568740	0.419961		602	962050	0.598037		602	6640270	0.8106		602	10344700	0.878098
595	603	562630	0.415449		603	954960	0.59363		603	6580030	0.803246		603	10284300	0.872971
596	604	557920	0.411971		604	931190	0.578853		604	6526300	0.796687		604	10225200	0.867955
597	605	545290	0.402645		605	923800	0.57426		605	6477260	0.7907		605	10158900	0.862327
598	606	534900	0.394973		606	914250	0.568323		606	6386760	0.779653		606	10089600	0.856444
599	607	525990	0.388394		607	900540	0.559801		607	6334880	0.77332		607	10008600	0.849569
600	608	516250	0.381202		608	887480	0.551682		608	6285010	0.767232		608	9944300	0.844111
601	609	506150	0.373744		609	873650	0.543085		609	6222930	0.759654		609	9874370	0.838175
602	610	498120	0.367814		610	866270	0.538497		610	6150790	0.750847		610	9796690	0.831581
603	611	485690	0.358636		611	854790	0.531361		611	6103310	0.745051		611	9729950	0.825916
604	612	481120	0.355262		612	838600	0.521297		612	6036840	0.736937		612	9646120	0.8188
605	613	472090	0.348594		613	826940	0.514049		613	5977100	0.729644		613	9565210	0.811932
606	614	459500	0.339297		614	809750	0.503363		614	5915010	0.722065		614	9482110	0.804878
607	615	456450	0.337045		615	802350	0.498763		615	5837060	0.712549		615	9425660	0.800087
608	616	445860	0.329225		616	789080	0.490514		616	5788640	0.706638		616	9344220	0.793174
609	617	439820	0.324765		617	776600	0.482756		617	5717560	0.697961		617	9254110	0.785525
610	618	432640	0.319464		618	767950	0.477379		618	5658620	0.690766		618	9188520	0.779957
611	619	424620	0.313542		619	756020	0.469963		619	5586970	0.68202		619	9112600	0.773513
612	620	412710	0.304747		620	746070	0.463778		620	5532690	0.675394		620	9018810	0.765552
613	621	406210	0.299948		621	733380	0.455889		621	5471180	0.667885		621	8946210	0.759389
614	622	400440	0.295687		622	721360	0.448417		622	5406430	0.659981		622	8872890	0.753165
615	623	397620	0.293605		623	710230	0.441499		623	5333540	0.651083		623	8773760	0.744751
616	624	384280	0.283754		624	698890	0.434449		624	5275840	0.644039		624	8695530	0.73811
617	625	375860	0.277537		625	693110	0.430856		625	5210730	0.636091		625	8639710	0.733372
618	626	372670	0.275181		626	682910	0.424516		626	5154930	0.629279		626	8559950	0.726602
619	627	361590	0.267		627	669090	0.415925		627	5080640	0.62021		627	8452420	0.717474
620	628	357480	0.263965		628	665150	0.413476		628	5034320	0.614556		628	8370820	0.710548
621	629	353400	0.260952		629	647440	0.402467		629	4968400	0.606509		629	8287250	0.703454
622	630	342990	0.253266		630	640690	0.398271		630	4900250	0.59819		630	8218380	0.697608
623	631	340220	0.25122		631	632800	0.393366		631	4842020	0.591081		631	8133480	0.690401
624	632	330850	0.244301		632	616130	0.383003		632	4781670	0.583714		632	8063510	0.684462
625	633	324670	0.239738		633	609570	0.378926		633	4742630	0.578948		633	7963380	0.675963
626	634	316540	0.233735		634	598020	0.371746		634	4672750	0.570418		634	7889460	0.669688
627	635	311640	0.230117		635	584870	0.363571		635	4597050	0.561177		635	7796960	0.661836
628	636	307110	0.226772		636	575860	0.357971		636	4549330	0.555352		636	7715890	0.654955
629	637	298950	0.220746		637	569050	0.353737		637	4485220	0.547526		637	7630590	0.647714
630	638	293390	0.216641		638	555980	0.345613		638	4436840	0.54162		638	7565680	0.642204
631	639	289390	0.213687		639	543850	0.338072		639	4377520	0.534378		639	7475790	0.634574
632	640	284340	0.209958		640	537950	0.334405		640	4323770	0.527817		640	7397590	0.627936
633	641	276350	0.204058		641	531100	0.330146		641	4255500	0.519483		641	7319920	0.621343
634	642	273760	0.202146		642	521910	0.324434		642	4206360	0.513484		642	7222690	0.61309
635	643	268240	0.19807		643	511040	0.317677		643	4137510	0.505079		643	7146050	0.606584
636	644	262340	0.193713		644	506320	0.314743		644	4089270	0.499191		644	7057150	0.599038
637	645	256100	0.189106		645	498500	0.309881		645	4036100	0.4927		645	6989130	0.593264
638	646	249940	0.184557		646	487280	0.302907		646	3970320	0.48467		646	6893870	0.585178
639	647	244690	0.18068		647	477950	0.297107		647	3917720	0.478249		647	6815760	0.578548
640	648	240490	0.177579		648	471710	0.293228		648	3854150	0.470489		648	6732070	0.571444
641	649	235220	0.173688		649	463720	0.288261		649	3796260	0.463422		649	6633340	0.563064
642	650	230590	0.170269		650	459950	0.285918		650	3741580	0.456747		650	6567180	0.557448
643	651	227240	0.167795		651	449640	0.279509		651	3695360	0.451105		651	6478770	0.549943
644	652	221060	0.163232		652	444050	0.276034		652	3639150	0.444243		652	6382420	0.541765
645	653	216820	0.160101		653	432380	0.268779		653	3579490	0.43696		653	6307320	0.53539
646	654	214110	0.1581		654	423840	0.263471		654	3531430	0.431093		654	6211670	0.527271
647	655	206210	0.152267		655	416710	0.259038		655	3475670	0.424286		655	6125160	0.519927
648	656	200760	0.148242		656	409980	0.254855		656	3412120	0.416529		656	6031770	0.512
649	657	198090	0.146271		657	402030	0.249913		657	3360780	0.410261		657	5942320	0.504407
650	658	192710	0.142298		658	394970	0.245524		658	3293940	0.402102		658	5866160	0.497942
651	659	187650	0.138562		659	384820	0.239215		659	3239710	0.395482		659	5771040	0.489868
652	660	184310	0.136095		660	380440	0.236492		660	3181230	0.388343		660	5674260	0.481653
653	661	179800	0.132765		661	374860	0.233023		661	3124070	0.381366		661	5585930	0.474155
654	662	174600	0.128926		662	365020	0.226907		662	3062680	0.373871		662	5492490	0.466224
655	663	168800	0.124643		663	359490	0.223469		663	3006260	0.366984		663	5413680	0.459534
656	664	170050	0.125566		664	351940	0.218776		664	2947960	0.359867		664	5300410	0.449919
657	665	161460	0.119223		665	345860	0.214996		665	2890880	0.352899		665	5218610	0.442976
658	666	160500	0.118514		666	336590	0.209234		666	2852230	0.348181		666	5121470	0.43473
659	667	155060	0.114497		667	333070	0.207046		667	2797020	0.341441		667	5044690	0.428213
660	668	153840	0.113596		668	328920	0.204466		668	2738960	0.334354		668	4953100	0.420438
661	669	146370	0.10808		669	317940	0.19764		669	2687910	0.328122		669	4865360	0.412991
662	670	145750	0.107623		670	317240	0.197205		670	2635360	0.321707		670	4769730	0.404873
663	671	139760	0.1032		671	307980	0.191449		671	2587220	0.31583		671	4685430	0.397717
664	672	139070	0.10269		672	302960	0.188328		672	2537520	0.309763		672	4606820	0.391045
665	673	134670	0.099441		673	296160	0.184101		673	2487410	0.303646		673	4517630	0.383474
666	674	130400	0.096288		674	291040	0.180919		674	2428660	0.296475		674	4431010	0.376121
667	675	128830	0.0951287		675	289760	0.180123		675	2380160	0.290554		675	4341220	0.3685
668	676	125030	0.0923228		676	280910	0.174621		676	2327160	0.284084		676	4271580	0.362588
669	677	122190	0.0902257		677	274700	0.170761		677	2284450	0.27887		677	4177520	0.354604
670	678	118560	0.0875453		678	269830	0.167734		678	2240340	0.273486		678	4097510	0.347813
671	679	117440	0.0867183		679	265160	0.164831		679	2185780	0.266825		679	3999760	0.339515
672	680	112100	0.0827752		680	259110	0.16107		680	2138120	0.261007		680	3926280	0.333278
673	681	108800	0.0803385		681	254100	0.157956		681	2092270	0.25541		681	3841000	0.326039
674	682	108140	0.0798511		682	251460	0.156314		682	2043270	0.249429		682	3765230	0.319607
675	683	104250	0.0769787		683	245670	0.152715		683	2002680	0.244474		683	3690680	0.313279
676	684	100920	0.0745199		684	237080	0.147375		684	1949270	0.237954		684	3596740	0.305305
677	685	98630	0.0728289		685	236970	0.147307		685	1908600	0.232989		685	3512780	0.298178
